# Supplementary material for: Modular safe-harbor transgene insertion (MosTI) for targeted single-copy and extrachromosomal array integration in C. elegans
Source: bioRxiv preprint, doi:10.1101/2022.04.19.488726, version 4 (2022-05-30)
Supplement: Supplemental Table 1 [file 488726_file03.xlsx]

## Sheet: 1. Strains
	Strain Name	Genotype	Description	Phenotype	Comments
	PS6038	unc-119(ed3) III; syEx1136	Source of unc-119(ed3)	Unc rescued	Highly outcrossed unc-119(ed3) version from Sternberg lab. Unc mutants segregating from this strain were used for generating MosTI landing sites
	CFJ77	kstSi32[cbr-unc-119(kst13)] I; unc-119(ed3)III	MosTI landing site Chr I - Unc selection	Unc
	CFJ42	kstSi42[cbr-unc-119(kst13)] II; unc-119(ed3)III	MosTI landing site Chr II - Unc selection	Unc
	CFJ94	unc-119(ed3)III; kstSi37[cbr-unc-119(kst13)] IV	MosTI landing site Chr IV - Unc selection	Unc
	CFJ111	kstSi61[cbr-unc-119(+, LoxP) hygroR(kst31) II; unc-119(ed3)III	MosTI landing site Chr II - Hygro selection	N2-like, non hygro resistant
	CFJ108	kstSi60[cbr-unc-119(+, LoxP)(+) Pmlc-2::gfp(kst32)] II; unc-119(ed3)III	MosTI landing site Chr II - fluorescence selection	N2-like, non-fluorescent
	CFJ184	kstSi84[cbr-unc-119(+, LoxP)(+) Pmlc-2::gfp(kst32)] I; unc-119(ed3)III	MosTI landing site Chr I - fluorescence selection	N2-like, non-fluorescent		´
	CFJ191	kstSi32[cbr-unc-119(kst13)] I; unc-119(ed3)III; kstEx45[Phsp-16.41::Cas9::gpd-2::TagRFP-T::smu-1 3' UTR, Pmlc-1::mCherry, NeoR]	MosTI landing site Chr I - Unc selection - HS Cas9 transgenic line	Unc, Neo resistant
	CFJ192	kstSi37[cbr-unc-119(kst13)] IV; unc-119(ed3)III; kstEx46[Phsp-16.41::Cas9::gpd-2::TagRFP-T::smu-1 3' UTR, Pmlc-1::mCherry, NeoR]	MosTI landing site Chr IV - Unc selection - HS Cas9 transgenic line	Unc, Neo resistant
	CFJ133	kstSi64 [unc-119(p1+p2, loxP)(+), Peft-3::ce-gfp]II; unc-119(ed3)III	Single copy MosTI insertion - Chr II	N2-like, fluorescent
	CFJ134	kstSi65 [unc-119(p1+p2, loxP)(+), Peft-3::ce-gfp]I; unc-119(ed3)III	Single copy MosTI insertion - Chr I	N2-like, fluorescent
	CFJ135	kstSi66 [unc-119(p1+p2, loxP)(+), Peft-3::ce-gfp]IV; unc-119(ed3)III	Single copy MosTI insertion - Chr IV	N2-like, fluorescent
	CFJ136	kstSi67 [unc-119(p1+p2, loxP)(+), Pmlc-2::gfp(p1,p2) (+), Pmex-5::ce-gfp]II; unc-119(ed3)III	Single copy MosTI insertion - Chr II	N2-like, fluorescent
	CFJ152	kstIs1 [Psmu-2::cas9::gpd-2::tagRFP::smu-1 3' UTR; unc-119 integration fragment; sgRNA 1; sgRNA 2; Pmlc-1::tagRFP; Pmlc-1::gfp, 1kb ladder] III	Array integration at unc-119 locus	N2-like, fluorescent
	CFJ154	kstIs3 [Psmu-2::cas9::gpd-2::tagRFP::smu-1 3' UTR; unc-119 integration fragment; sgRNA 1; sgRNA 2; Pmlc-1::tagRFP; Pmlc-1::gfp, 1kb ladder] III	Array integration at unc-119 locus	N2-like, fluorescent
	CFJ155	kstIs4 [Psmu-2::cas9::gpd-2::tagRFP::smu-1 3' UTR; unc-119 integration fragment; sgRNA 1; sgRNA 2; Pmlc-1::tagRFP; Pmlc-1::gfp, 1kb ladder] III	Array integration at unc-119 locus	N2-like, fluorescent
	CFJ156	kstIs5 [Psmu-2::cas9::gpd-2::tagRFP::smu-1 3' UTR; unc-119 integration fragment; sgRNA 1; sgRNA 2; Pmlc-1::tagRFP; Pmlc-1::gfp, 1kb ladder] III	Array integration at unc-119 locus	N2-like, fluorescent
	CFJ157	kstIs6 [unc-119 integration fragment; Pmlc-1::tagRFP; Pmlc-1::gfp; HygroR; 1kb ladder] III	Array integration at unc-119 locus	N2-like, fluorescent	Long-read Oxford Nanopore assembly of array integration done on this strain.
	CFJ158	kstIs7 [unc-119 integration fragment; Pmlc-1::tagRFP; Pmlc-1::gfp; HygroR; 1kb ladder] III	Array integration at unc-119 locus	N2-like, fluorescent
	CFJ159	kstIs8 [unc-119 integration fragment; Pmlc-1::tagRFP; Pmlc-1::gfp; HygroR; 1kb ladder] III	Array integration at unc-119 locus	N2-like, fluorescent
	CFJ160	kstIs9 [unc-119 integration fragment; Pmlc-1::tagRFP; Pmlc-1::gfp; HygroR; 1kb ladder] III	Array integration at unc-119 locus	N2-like, fluorescent

## Sheet: 2. Plasmids
Plasmid name	Composition	Resistance	Addgene	Method to generate	Reference
pCFJ2474	Psmu-2::Cas9(PATCs) gpd-2 tagRFP-T(myr, PATC) smu-1 3' UTR	AmpR	#159816	Three-fragment Gateway	Aljohani et al. 2020 Nat Comms.
pCFJ2563	MosTI(unc-119)[Prpl-7A::gfp ]	AmpR		Gene synthesis	This study
pCFJ782	HygroR	AmpR		PCR and Gateway cloning	Radman et al. 2013 PlosOne
pGH8	Prab-3::mCherry	AmpR	#19359	Three-fragment Gateway	Frøkjær-Jensen et al. 2008 Nature Genetics
pMDJ231	Phsp-16.41::Cas9::gpd-2::TagRFP-T::smu-1 UTR	AmpR		Three-fragment Gateway	This study
pMDJ39	Peft-3::Cre(PATC) tbb-2 3' UTR	AmpR		Three-fragment Gateway	This study
pSEM203	Landing cassette MosTI Chr II (unc-119)	AmpR		Gene synthesis and Golden-Gate assembly	This study
pSEM224	Landing casssette MosTI Chr I (unc-119)	AmpR		Golden-Gate cloning	This study
pSEM226	Landing casssette MosTI Chr IV (unc-119)	AmpR		Golden-Gate cloning	This study
pSEM231	Pmlc-1::ce-gfp::cbr-tbb-2 3'UTR	AmpR	#159897	Three-fragment Gateway	El Mouridi et al. 2020 MicroPublication Biology
pSEM233	Pmlc-1::tagRFP::cbr-tbb-2 3' UTR	AmpR	#159899	Three-fragment Gateway	El Mouridi et al. 2020 MicroPublication Biology
pSEM246	mosTI(unc-119) MCS cloning vector	AmpR	#182343	Gene synthesis	This study
pSEM247	MosTI(unc-119)[Peft-3::mMaple]	AmpR			This study
pSEM252	pDESTR4-R3 mosTI(unc-119) Gateway cloning vector	AmpR/Chlo	#159839	Golden-Gate cloning	This study
pSEM253	sgRNA hygroR mosTI selection	AmpR	#159827	Gene synthesis	This study
pSEM255	sgRNA spacer for Pmlc-2::gfp site	AmpR	#159835	Gene synthesis	This study
pSEM258	MosTi landing site conversion (unc-119 to HygroR)	AmpR		Gene synthesis and Golden-Gate assembly	This study
pSEM260	MosTi landing site conversion (unc-119 to Pmlc-2::gfp)	AmpR		Gene synthesis and Golden-Gate assembly	This study
pSEM262	pDESTR4-R3 mosTI Hygro Gateway cloning vector	AmpR/Chlo	#159840	Golden-Gate cloning	This study
pSEM264	pDESTR4-R3 mosTI Pmlc-2 gfp Gateway cloning vector	AmpR/Chlo	#159842	Golden-Gate cloning	This study
pSEM266	HygroR MosTI (Pmex-5::ce-gfp) target construct	AmpR	#159829		This study
pSEM268	Pmcl-2::gfp MosTI (Pmex-5-ce-gfp) target construct	AmpR	#159837		This study
pSEM270	HygroR MosTI target vector (MCS)	AmpR	#159826	Gene synthesis	This study
pSEM272	Pmlc-2::gfp MosTI targeting vector (MCS)	AmpR	#159834	Gene synthesis	This study
pSEM316	MosTI(unc-119)[Peft-3::mScarlet]	AmpR			This study
pSEM318	sgRNA mosTI unc-119 selection	AmpR	#159822	Gene synthesis	This study
pSEM319	Array insertion fragment unc-119 MosTI selection	AmpR	#159823	Gene synthesis	This study
pSEM320	sgRNA array insertion MosTI unc-119 selection	AmpR	#159824	Gene synthesis	This study
pSEM321	HygroR array insertion fragment	AmpR	#159828	Gene synthesis	This study
pSEM323	sgRNA array insertion Pmlc-2::gfp selection	AmpR	#159836	Gene synthesis	This study
pSEM351	MosTI(unc-119)[Peft-3::ce-gfp]	AmpR			This study
pSEM371	Array insertion fragment unc-119 locus	AmpR	#182640	Gene synthesis	This study
pSEM376	sgRNA for array insertion at unc-119 locus	AmpR	#182344	Gene synthesis	This study
pSEM377	sgRNA array insertion into unc-119 locus	AmpR		Gene synthesis	This study
pSEM386	mosTI(unc-119)[NNN | gfp | tbb-2] cloning vector	AmpR	#182345	Gene synthesis	This study
pSEM387	mosTI(unc-119)[NNN | gfp(nls) | tbb-2] cloning vector	AmpR	#182347	Gene synthesis	This study
pSEM388	mosTI(unc-119)[NNN | mScarlet | tbb-2] cloning vector	AmpR	#182348	Gene synthesis	This study
pSEM389	mosTI(unc-119)[NNN | mScarlet(2xNLS) | tbb-2] cloning vector	AmpR	#182349	Gene synthesis	This study
pSEM390	mosTI(unc-119)[Peft-3 | NNN | tbb-2] cloning vector	AmpR	#182350	Gene synthesis	This study
pSEM391	mosTI(unc-119)[Pmex-5 | NNN | tbb-2] cloning vector	AmpR	#182351	Gene synthesis	This study
pSEM394	mosTI(unc-119)[UPN | NNN | tbb-2] cloning vector	AmpR	#182352	Gene synthesis	This study
pSEM396	mosTI(unc-119)[NNN | operon | gfp tbb-2 utr] cloning vector	AmpR	#182353	Gene synthesis	This study
pSEM397	mosTI(unc-119) [NNN | operon | gfp(nls) tbb-2 utr] cloning vector	AmpR	#182354	Gene synthesis	This study
pSEM398	mosTI(unc-119) [NNN | operon | mScarlet tbb-2 utr] cloning vector	AmpR	#182355	Gene synthesis	This study
pSEM399	mosTI(unc-119) [NNN | operon | mScarlet(nls) tbb-2 utr] cloning vector	AmpR	#182356	Gene synthesis	This study
pSEM414	mosTI(unc-119)[Peft-3 | gfp(NLS) | tbb-2]	AmpR	#182357	Gene synthesis	This study
pSEM415	mosTI(unc-119)[Pmex-5 | gfp(NLS) | tbb-2]	AmpR	#182358	Gene synthesis	This study
pSEM416	mosTI(unc-119)[Pupn (ultra pan neuronal) | gfp(NLS) | tbb-2]	AmpR	#182359	Gene synthesis	This study
pSEM431	sgRNA MosTI insertion at ttTi5605	AmpR		Gene synthesis	This study
pSEM432	sgRNA MosTI insertion on chr I	AmpR		Gene synthesis	This study
pSEM433	sgRNA MosTI insertion on Chr. IV	AmpR		Gene synthesis	This study
pSEM434	sgRNA MosTI insertion on Chr. V	AmpR		Gene synthesis	This study

## Sheet: 3. Insertion sites
	Table 1
	Chromosome	Genomic location	Exact MosTI location (spacer - PAM)	Genetic location	Flanking genes	Strain	Landing sites	Selection	Target vector (MCS / Golden Gate)	Target vector three-fragment Gateway	sgRNA (single-copy)	Array target co-inject vectors	sgRNA (array integration)
	MosTI safe-harbor landing sites
	Chr. I	I: 7.5 Mb	TTCCGTGTCTTACTAC|TGTA - AGG	I: 2.09	spe-4, lars-2	CFJ77	kstSi32	unc-119	pSEM246	pSEM252	pSEM318	pSEM319	pSEM320
						CFJ184	kstSi84	Pmlc-2:gfp	pSEM272	pSEM264	pSEM255	pSEM323	pSEM323
	Chr. II	II: 8.4 Mb		II: 0.77	F14E5.1, F14E5.8	CFJ42	kstSi42	unc-119	pSEM246	pSEM252	pSEM318	pSEM319	pSEM320
			GATATCAGTCTGTTTCG|TAA - CGG			CFJ108	kstSi50	Pmlc-2:gfp	pSEM272	pSEM264	pSEM255	pSEM323	pSEM323
						CFJ111	kstSi61	HygroR	pSEM270	pSEM262	pSEM253	pSEM321	pSEM321
	Chr. IV	IV: 8.6 Mb	TAACTCTCAAGATCAAA|ACC - TGG	IV: 3.91	F42A9.3, F42A9.8	CFJ94	kstSi37	unc-119	pSEM246	pSEM252	pSEM318	pSEM319	pSEM320
	Array integration endogenous loci
	Chr. III	III: 10.9 Mb	n.a.	II: 5.59	unc-119	n.a.	unc-119(ed3)	unc-119	n.a.	n.a.	n.a.	pSEM371	pSEM376

## Sheet: 4. CFJ42 - SNPs
Chr	Positions	Ref	Alt	Type	Impact	Gene	WBGene	Transcript	Change	AA change	quality by depth (~12 = hetrozygous, ~30 = homozygous)
V	5084681	A	G	synonymous_variant	LOW	Y58A7A.4	WBGene00021978	Y58A7A.4	c.279T>C	p.Ile93Ile	36.92
X	85345	A	C	missense_variant&splice_region_variant	MODERATE	Y73B3A.3	WBGene00022205	Y73B3A.3	c.1466T>G	p.Leu489Arg	36.19
X	15748072	C	G	missense_variant	MODERATE	ZK678.t2	WBGene00014627	ZK678.t2	c.42C>G	p.Asp14Glu	35.59
IV	7597783	T	A	missense_variant	MODERATE	tag-80	WBGene00018468	F45E4.3a	c.8017T>A	p.Cys2673Ser	35.27
IV	7597783	T	A	missense_variant	MODERATE	tag-80	WBGene00018468	F45E4.3b	c.8017T>A	p.Cys2673Ser	35.27
V	7403446	A	G	synonymous_variant	LOW	srj-13	WBGene00005601	R13D7.3	c.585A>G	p.Glu195Glu	34.9
V	15766903	C	G	stop_gained	HIGH	F57A10.2	WBGene00010184	F57A10.2	c.230C>G	p.Ser77*	34.9
X	3812085	A	T	synonymous_variant	LOW	F35A5.1	WBGene00018024	F35A5.1	c.4620A>T	p.Pro1540Pro	34.74
V	6178803	T	C	synonymous_variant	LOW	ttn-1	WBGene00006436	W06H8.8g	c.18333A>G	p.Lys6111Lys	34.71
V	6178803	T	C	synonymous_variant	LOW	ttn-1	WBGene00006436	W06H8.8e.2	c.18333A>G	p.Lys6111Lys	34.71
V	6178803	T	C	synonymous_variant	LOW	ttn-1	WBGene00006436	W06H8.8f.2	c.18333A>G	p.Lys6111Lys	34.71
V	6178803	T	C	synonymous_variant	LOW	ttn-1	WBGene00006436	W06H8.8e.1	c.18333A>G	p.Lys6111Lys	34.71
V	6178803	T	C	synonymous_variant	LOW	ttn-1	WBGene00006436	W06H8.8f.1	c.18333A>G	p.Lys6111Lys	34.71
V	6178803	T	C	synonymous_variant	LOW	ttn-1	WBGene00006436	W06H8.8d	c.18273A>G	p.Lys6091Lys	34.71
V	15159894	C	T	missense_variant	MODERATE	str-45	WBGene00006110	T09F5.3	c.704C>T	p.Thr235Ile	34.71
II	3551208	G	A	missense_variant&splice_region_variant	MODERATE	W10G11.19	WBGene00021148	W10G11.19	c.217G>A	p.Glu73Lys	34.7
II	6628950	C	G	stop_gained	HIGH	F54H5.2	WBGene00018839	F54H5.2a	c.968C>G	p.Ser323*	34.69
II	6628950	C	G	stop_gained	HIGH	F54H5.2	WBGene00018839	F54H5.2b	c.206C>G	p.Ser69*	34.69
II	6628950	C	G	stop_gained	HIGH	F54H5.2	WBGene00018839	F54H5.2c	c.86C>G	p.Ser29*	34.69
X	15748074	A	G	missense_variant	MODERATE	ZK678.t2	WBGene00014627	ZK678.t2	c.44A>G	p.Lys15Arg	34.66
IV	11405088	A	G	missense_variant	MODERATE	cyp-31A2	WBGene00010354	H02I12.8	c.934A>G	p.Ile312Val	34.61
X	11578045	A	G	missense_variant	MODERATE	frm-3	WBGene00001490	H05G16.1	c.664A>G	p.Lys222Glu	34.6
II	6759977	C	G	missense_variant	MODERATE	F41G3.2	WBGene00018299	F41G3.2	c.574C>G	p.Arg192Gly	34.54
V	14424443	G	T	missense_variant	MODERATE	rrbs-1	WBGene00007617	C15H11.9	c.508C>A	p.Leu170Ile	34.5
I	4530052	T	A	splice_region_variant&intron_variant	LOW	bet-1	WBGene00022473	Y119C1B.8a	c.1897+8A>T		34.42
I	4530052	T	A	splice_region_variant&intron_variant	LOW	bet-1	WBGene00022473	Y119C1B.8b	c.1897+8A>T		34.42
II	4735861	G	A	missense_variant	MODERATE	F41C3.6	WBGene00018272	F41C3.6	c.502G>A	p.Gly168Arg	34.31
X	8814726	T	G	synonymous_variant	LOW	R04E5.2	WBGene00019869	R04E5.2	c.1017T>G	p.Ser339Ser	34.17
X	3812044	G	A	missense_variant	MODERATE	F35A5.1	WBGene00018024	F35A5.1	c.4579G>A	p.Glu1527Lys	34.14
II	9105427	A	C	missense_variant	MODERATE	T24H10.5	WBGene00012003	T24H10.5	c.1242A>C	p.Glu414Asp	34.13
II	6896377	T	A	splice_region_variant&intron_variant	LOW	C44B7.11	WBGene00016631	C44B7.11	c.877-5A>T		34.02
V	6177096	C	A	synonymous_variant	LOW	ttn-1	WBGene00006436	W06H8.8g	c.20040G>T	p.Val6680Val	34
V	6177096	C	A	synonymous_variant	LOW	ttn-1	WBGene00006436	W06H8.8e.2	c.20040G>T	p.Val6680Val	34
V	6177096	C	A	synonymous_variant	LOW	ttn-1	WBGene00006436	W06H8.8f.2	c.20040G>T	p.Val6680Val	34
V	6177096	C	A	synonymous_variant	LOW	ttn-1	WBGene00006436	W06H8.8e.1	c.20040G>T	p.Val6680Val	34
V	6177096	C	A	synonymous_variant	LOW	ttn-1	WBGene00006436	W06H8.8f.1	c.20040G>T	p.Val6680Val	34
V	6177096	C	A	synonymous_variant	LOW	ttn-1	WBGene00006436	W06H8.8d	c.19980G>T	p.Val6660Val	34
X	85332	T	A	missense_variant	MODERATE	Y73B3A.3	WBGene00022205	Y73B3A.3	c.1479A>T	p.Glu493Asp	34
II	5974584	T	C	missense_variant	MODERATE	B0034.5	WBGene00015005	B0034.5	c.311A>G	p.Lys104Arg	33.76
IV	7596509	T	A	synonymous_variant	LOW	tag-80	WBGene00018468	F45E4.3a	c.6810T>A	p.Val2270Val	33.73
IV	7596509	T	A	synonymous_variant	LOW	tag-80	WBGene00018468	F45E4.3b	c.6810T>A	p.Val2270Val	33.73
III	10368882	C	G	splice_region_variant&synonymous_variant	LOW	tbc-8	WBGene00008018	C38H2.1a	c.801C>G	p.Ser267Ser	33.7
III	10368882	C	G	splice_region_variant&synonymous_variant	LOW	tbc-8	WBGene00008018	C38H2.1b	c.117C>G	p.Ser39Ser	33.7
III	9588882	C	T	missense_variant	MODERATE	acox-5	WBGene00008167	C48B4.1	c.1093G>A	p.Glu365Lys	33.67
III	10907944	C	T	stop_gained	HIGH	unc-119	WBGene00006843	M142.1c	c.412C>T	p.Arg138*	33.67
III	10907944	C	T	stop_gained	HIGH	unc-119	WBGene00006843	M142.1a	c.337C>T	p.Arg113*	33.67
III	10907944	C	T	stop_gained	HIGH	unc-119	WBGene00006843	M142.1b	c.277C>T	p.Arg93*	33.67
IV	7597246	T	A	splice_donor_variant&intron_variant	HIGH	tag-80	WBGene00018468	F45E4.3a	c.7482+1T>A		33.62
IV	7597246	T	A	splice_donor_variant&intron_variant	HIGH	tag-80	WBGene00018468	F45E4.3b	c.7482+1T>A		33.62
V	5084795	A	G	synonymous_variant	LOW	Y58A7A.4	WBGene00021978	Y58A7A.4	c.213T>C	p.Asp71Asp	33.59
V	3216744	C	T	synonymous_variant	LOW	apx-1	WBGene00000168	K08D9.3	c.825C>T	p.Val275Val	33.52
III	8976491	C	T	missense_variant&splice_region_variant	MODERATE	pde-2	WBGene00011146	R08D7.6a	c.2072G>A	p.Arg691Lys	33.34
III	8976491	C	T	missense_variant&splice_region_variant	MODERATE	pde-2	WBGene00011146	R08D7.6b	c.2063G>A	p.Arg688Lys	33.34
IV	13157706	C	A	synonymous_variant	LOW	msh-5	WBGene00003421	F09E8.3a	c.1281C>A	p.Val427Val	33.32
IV	15712902	T	G	synonymous_variant	LOW	Y105C5A.15	WBGene00013639	Y105C5A.15c	c.393T>G	p.Thr131Thr	33.17
IV	15712902	T	G	synonymous_variant	LOW	Y105C5A.15	WBGene00013639	Y105C5A.15e	c.393T>G	p.Thr131Thr	33.17
IV	15712902	T	G	synonymous_variant	LOW	Y105C5A.15	WBGene00013639	Y105C5A.15a	c.111T>G	p.Thr37Thr	33.17
IV	15712902	T	G	synonymous_variant	LOW	Y105C5A.15	WBGene00013639	Y105C5A.15b	c.111T>G	p.Thr37Thr	33.17
IV	7596502	C	A	missense_variant	MODERATE	tag-80	WBGene00018468	F45E4.3a	c.6803C>A	p.Ala2268Glu	33.13
IV	7596502	C	A	missense_variant	MODERATE	tag-80	WBGene00018468	F45E4.3b	c.6803C>A	p.Ala2268Glu	33.13
IV	7482096	G	C	missense_variant	MODERATE	rod-1	WBGene00018900	F55G1.4	c.3296G>C	p.Ser1099Thr	33.06
I	10272522	T	A	missense_variant	MODERATE	ZC247.1	WBGene00013859	ZC247.1	c.5429A>T	p.Gln1810Leu	32.98
X	2192531	T	C	missense_variant	MODERATE	gap-1	WBGene00001515	T24C12.2	c.28T>C	p.Cys10Arg	32.59
V	5084684	T	A	synonymous_variant	LOW	Y58A7A.4	WBGene00021978	Y58A7A.4	c.276A>T	p.Arg92Arg	32.57
V	8633529	G	A	missense_variant	MODERATE	oac-29	WBGene00018295	F41E6.14	c.872C>T	p.Ser291Phe	32.56
II	1604202	C	A	synonymous_variant	LOW	bath-47	WBGene00006464	T07H3.1	c.1785C>A	p.Ile595Ile	32.49
III	6090953	G	C	missense_variant	MODERATE	C05D10.4	WBGene00015480	C05D10.4b	c.529C>G	p.Pro177Ala	32.38
III	6090953	G	C	missense_variant	MODERATE	C05D10.4	WBGene00015480	C05D10.4a	c.433C>G	p.Pro145Ala	32.38
III	6090953	G	C	5_prime_UTR_premature_start_codon_gain_variant	LOW	C05D10.4	WBGene00015480	C05D10.4c	c.-9C>G		32.38
II	6759980	A	G	missense_variant	MODERATE	F41G3.2	WBGene00018299	F41G3.2	c.577A>G	p.Asn193Asp	32.37
III	9677390	C	T	synonymous_variant	LOW	ugt-60	WBGene00007402	C07A9.6	c.1017G>A	p.Arg339Arg	32.36
IV	7591643	A	C	missense_variant	MODERATE	tag-80	WBGene00018468	F45E4.3a	c.1944A>C	p.Glu648Asp	32.34
IV	7591643	A	C	missense_variant	MODERATE	tag-80	WBGene00018468	F45E4.3b	c.1944A>C	p.Glu648Asp	32.34
II	229875	T	C	missense_variant	MODERATE	Y43H11AL.1	WBGene00021545	Y43H11AL.1b.1	c.733A>G	p.Lys245Glu	32.3
II	229875	T	C	missense_variant	MODERATE	Y43H11AL.1	WBGene00021545	Y43H11AL.1c	c.691A>G	p.Lys231Glu	32.3
II	229875	T	C	missense_variant	MODERATE	Y43H11AL.1	WBGene00021545	Y43H11AL.1b.2	c.733A>G	p.Lys245Glu	32.3
II	229875	T	C	missense_variant	MODERATE	Y43H11AL.1	WBGene00021545	Y43H11AL.1a.1	c.733A>G	p.Lys245Glu	32.3
II	229875	T	C	missense_variant	MODERATE	Y43H11AL.1	WBGene00021545	Y43H11AL.1a.2	c.733A>G	p.Lys245Glu	32.3
X	15227130	C	A	missense_variant	MODERATE	H03A11.2	WBGene00010357	H03A11.2	c.2889G>T	p.Gln963His	32.2
II	1684494	G	A	missense_variant	MODERATE	fbxb-25	WBGene00019034	F58E1.2	c.397G>A	p.Gly133Arg	32.16
X	3812034	A	T	synonymous_variant	LOW	F35A5.1	WBGene00018024	F35A5.1	c.4569A>T	p.Thr1523Thr	32.1
X	15226938	C	T	synonymous_variant	LOW	H03A11.2	WBGene00010357	H03A11.2	c.3081G>A	p.Lys1027Lys	32.08
II	7107557	C	T	missense_variant	MODERATE	F10E7.9	WBGene00017350	F10E7.9	c.880G>A	p.Gly294Ser	32.07
II	8068182	G	A	splice_region_variant	LOW	pdha-1	WBGene00011510	T05H10.6b	c.*377G>A		32.01
II	8068182	G	A	splice_region_variant	LOW	pdha-1	WBGene00011510	T05H10.6a.3	c.*377G>A		32.01
II	8068182	G	A	splice_region_variant	LOW	pdha-1	WBGene00011510	T05H10.6a.1	c.*377G>A		32.01
II	8068182	G	A	splice_region_variant	LOW	pdha-1	WBGene00011510	T05H10.6a.2	c.*377G>A		32.01
X	3812013	T	G	synonymous_variant	LOW	F35A5.1	WBGene00018024	F35A5.1	c.4548T>G	p.Pro1516Pro	31.98
X	3812028	T	G	missense_variant	MODERATE	F35A5.1	WBGene00018024	F35A5.1	c.4563T>G	p.Ser1521Arg	31.88
IV	7596427	A	T	missense_variant	MODERATE	tag-80	WBGene00018468	F45E4.3a	c.6728A>T	p.Tyr2243Phe	31.81
IV	7596427	A	T	missense_variant	MODERATE	tag-80	WBGene00018468	F45E4.3b	c.6728A>T	p.Tyr2243Phe	31.81
III	8693705	G	A	synonymous_variant	LOW	B0303.7	WBGene00015128	B0303.7a	c.51G>A	p.Gly17Gly	31.8
V	17598297	G	A	synonymous_variant	LOW	Y6G8.2	WBGene00012404	Y6G8.2a	c.81C>T	p.Leu27Leu	31.76
V	19029747	G	A	missense_variant	MODERATE	Y39B6A.25	WBGene00012684	Y39B6A.25	c.1153G>A	p.Gly385Arg	31.72
V	18941877	A	C	missense_variant	MODERATE	Y80D3A.8	WBGene00013586	Y80D3A.8	c.779A>C	p.Glu260Ala	31.64
V	6177140	C	T	missense_variant	MODERATE	ttn-1	WBGene00006436	W06H8.8g	c.19996G>A	p.Glu6666Lys	31.53
V	6177140	C	T	missense_variant	MODERATE	ttn-1	WBGene00006436	W06H8.8e.2	c.19996G>A	p.Glu6666Lys	31.53
V	6177140	C	T	missense_variant	MODERATE	ttn-1	WBGene00006436	W06H8.8f.2	c.19996G>A	p.Glu6666Lys	31.53
V	6177140	C	T	missense_variant	MODERATE	ttn-1	WBGene00006436	W06H8.8e.1	c.19996G>A	p.Glu6666Lys	31.53
V	6177140	C	T	missense_variant	MODERATE	ttn-1	WBGene00006436	W06H8.8f.1	c.19996G>A	p.Glu6666Lys	31.53
V	6177140	C	T	missense_variant	MODERATE	ttn-1	WBGene00006436	W06H8.8d	c.19936G>A	p.Glu6646Lys	31.53
V	8757776	G	T	missense_variant	MODERATE	B0507.7	WBGene00015224	B0507.7	c.450C>A	p.Asn150Lys	31.45
II	9169079	C	T	missense_variant	MODERATE	T23G7.2	WBGene00011965	T23G7.2a.1	c.457G>A	p.Ala153Thr	31.4
II	9169079	C	T	missense_variant	MODERATE	T23G7.2	WBGene00011965	T23G7.2a.2	c.457G>A	p.Ala153Thr	31.4
IV	783851	G	A	synonymous_variant	LOW	ugt-52	WBGene00018931	F56B3.7	c.1356G>A	p.Arg452Arg	31.37
II	7003307	T	C	missense_variant	MODERATE	C52E12.t2	WBGene00022966	C52E12.t2	c.35T>C	p.Val12Ala	31.3
X	3812027	G	C	missense_variant	MODERATE	F35A5.1	WBGene00018024	F35A5.1	c.4562G>C	p.Ser1521Thr	31.3
X	3502807	C	T	missense_variant	MODERATE	C12D12.1	WBGene00015713	C12D12.1c	c.620C>T	p.Thr207Ile	31.27
X	3502807	C	T	missense_variant	MODERATE	C12D12.1	WBGene00015713	C12D12.1b	c.620C>T	p.Thr207Ile	31.27
X	3502807	C	T	missense_variant	MODERATE	C12D12.1	WBGene00015713	C12D12.1a	c.620C>T	p.Thr207Ile	31.27
IV	7596481	T	A	missense_variant	MODERATE	tag-80	WBGene00018468	F45E4.3a	c.6782T>A	p.Val2261Glu	31.22
IV	7596481	T	A	missense_variant	MODERATE	tag-80	WBGene00018468	F45E4.3b	c.6782T>A	p.Val2261Glu	31.22
I	4765810	C	G	missense_variant	MODERATE	M04F3.2	WBGene00019768	M04F3.2	c.57C>G	p.Cys19Trp	31.18
III	1879552	T	G	missense_variant	MODERATE	smi-1	WBGene00004886	Y39A3CR.1a	c.479T>G	p.Phe160Cys	31.15
III	1879552	T	G	missense_variant	MODERATE	smi-1	WBGene00004886	Y39A3CR.1b	c.170T>G	p.Phe57Cys	31.15
I	10270583	C	T	synonymous_variant	LOW	ZC247.1	WBGene00013859	ZC247.1	c.7368G>A	p.Lys2456Lys	31.11
II	5974583	C	T	synonymous_variant	LOW	B0034.5	WBGene00015005	B0034.5	c.312G>A	p.Lys104Lys	30.93
II	6470161	C	A	synonymous_variant	LOW	T28D9.12	WBGene00044669	T28D9.12	c.162G>T	p.Ser54Ser	30.93
V	6177120	A	G	synonymous_variant	LOW	ttn-1	WBGene00006436	W06H8.8g	c.20016T>C	p.Ile6672Ile	30.73
V	6177120	A	G	synonymous_variant	LOW	ttn-1	WBGene00006436	W06H8.8e.2	c.20016T>C	p.Ile6672Ile	30.73
V	6177120	A	G	synonymous_variant	LOW	ttn-1	WBGene00006436	W06H8.8f.2	c.20016T>C	p.Ile6672Ile	30.73
V	6177120	A	G	synonymous_variant	LOW	ttn-1	WBGene00006436	W06H8.8e.1	c.20016T>C	p.Ile6672Ile	30.73
V	6177120	A	G	synonymous_variant	LOW	ttn-1	WBGene00006436	W06H8.8f.1	c.20016T>C	p.Ile6672Ile	30.73
V	6177120	A	G	synonymous_variant	LOW	ttn-1	WBGene00006436	W06H8.8d	c.19956T>C	p.Ile6652Ile	30.73
V	6406771	C	A	missense_variant	MODERATE	F57F4.4	WBGene00019017	F57F4.4	c.1171G>T	p.Asp391Tyr	30.66
III	9918846	C	G	synonymous_variant	LOW	F40F12.3	WBGene00009592	F40F12.3	c.756G>C	p.Gly252Gly	30.63
IV	10950293	A	C	missense_variant	MODERATE	Y69E1A.2	WBGene00013474	Y69E1A.2	c.368A>C	p.Lys123Thr	30.57
IV	10950294	G	A	synonymous_variant	LOW	Y69E1A.2	WBGene00013474	Y69E1A.2	c.369G>A	p.Lys123Lys	30.57
IV	7596492	G	T	missense_variant	MODERATE	tag-80	WBGene00018468	F45E4.3a	c.6793G>T	p.Val2265Leu	30.48
IV	7596492	G	T	missense_variant	MODERATE	tag-80	WBGene00018468	F45E4.3b	c.6793G>T	p.Val2265Leu	30.48
IV	7597194	T	A	missense_variant	MODERATE	tag-80	WBGene00018468	F45E4.3a	c.7431T>A	p.Asp2477Glu	30.44
IV	7597194	T	A	missense_variant	MODERATE	tag-80	WBGene00018468	F45E4.3b	c.7431T>A	p.Asp2477Glu	30.44
V	8757777	T	G	missense_variant	MODERATE	B0507.7	WBGene00015224	B0507.7	c.449A>C	p.Asn150Thr	30.29
MtDNA	12998	C	T	synonymous_variant	LOW	nduo-5	WBGene00010967	MTCE.35	c.1308C>T	p.Gly436Gly	30.22
I	4765802	G	T	stop_gained	HIGH	M04F3.2	WBGene00019768	M04F3.2	c.49G>T	p.Glu17*	30.13
V	3519267	T	G	missense_variant	MODERATE	str-227	WBGene00006258	C07G3.3	c.619T>G	p.Leu207Val	30
II	10313373	T	C	missense_variant	MODERATE	gcy-5	WBGene00001532	ZK970.6	c.1907A>G	p.Gln636Arg	29.98
III	2253925	A	T	missense_variant&splice_region_variant	MODERATE	fbxa-73	WBGene00020640	T20H9.4	c.91A>T	p.Met31Leu	29.97
V	5084650	T	C	missense_variant	MODERATE	Y58A7A.4	WBGene00021978	Y58A7A.4	c.310A>G	p.Asn104Asp	29.96
III	3650272	G	A	missense_variant	MODERATE	madf-8	WBGene00008118	C46F11.3	c.152C>T	p.Thr51Ile	29.89
V	6177142	G	A	missense_variant	MODERATE	ttn-1	WBGene00006436	W06H8.8g	c.19994C>T	p.Ser6665Phe	29.86
V	6177142	G	A	missense_variant	MODERATE	ttn-1	WBGene00006436	W06H8.8e.2	c.19994C>T	p.Ser6665Phe	29.86
V	6177142	G	A	missense_variant	MODERATE	ttn-1	WBGene00006436	W06H8.8f.2	c.19994C>T	p.Ser6665Phe	29.86
V	6177142	G	A	missense_variant	MODERATE	ttn-1	WBGene00006436	W06H8.8e.1	c.19994C>T	p.Ser6665Phe	29.86
V	6177142	G	A	missense_variant	MODERATE	ttn-1	WBGene00006436	W06H8.8f.1	c.19994C>T	p.Ser6665Phe	29.86
V	6177142	G	A	missense_variant	MODERATE	ttn-1	WBGene00006436	W06H8.8d	c.19934C>T	p.Ser6645Phe	29.86
III	8693701	G	C	missense_variant	MODERATE	B0303.7	WBGene00015128	B0303.7a	c.47G>C	p.Cys16Ser	29.81
V	6178832	T	C	missense_variant	MODERATE	ttn-1	WBGene00006436	W06H8.8g	c.18304A>G	p.Ile6102Val	29.81
V	6178832	T	C	missense_variant	MODERATE	ttn-1	WBGene00006436	W06H8.8e.2	c.18304A>G	p.Ile6102Val	29.81
V	6178832	T	C	missense_variant	MODERATE	ttn-1	WBGene00006436	W06H8.8f.2	c.18304A>G	p.Ile6102Val	29.81
V	6178832	T	C	missense_variant	MODERATE	ttn-1	WBGene00006436	W06H8.8e.1	c.18304A>G	p.Ile6102Val	29.81
V	6178832	T	C	missense_variant	MODERATE	ttn-1	WBGene00006436	W06H8.8f.1	c.18304A>G	p.Ile6102Val	29.81
V	6178832	T	C	missense_variant	MODERATE	ttn-1	WBGene00006436	W06H8.8d	c.18244A>G	p.Ile6082Val	29.81
V	6177100	T	G	missense_variant	MODERATE	ttn-1	WBGene00006436	W06H8.8g	c.20036A>C	p.Gln6679Pro	29.77
V	6177100	T	G	missense_variant	MODERATE	ttn-1	WBGene00006436	W06H8.8e.2	c.20036A>C	p.Gln6679Pro	29.77
V	6177100	T	G	missense_variant	MODERATE	ttn-1	WBGene00006436	W06H8.8f.2	c.20036A>C	p.Gln6679Pro	29.77
V	6177100	T	G	missense_variant	MODERATE	ttn-1	WBGene00006436	W06H8.8e.1	c.20036A>C	p.Gln6679Pro	29.77
V	6177100	T	G	missense_variant	MODERATE	ttn-1	WBGene00006436	W06H8.8f.1	c.20036A>C	p.Gln6679Pro	29.77
V	6177100	T	G	missense_variant	MODERATE	ttn-1	WBGene00006436	W06H8.8d	c.19976A>C	p.Gln6659Pro	29.77
V	5084642	C	T	synonymous_variant	LOW	Y58A7A.4	WBGene00021978	Y58A7A.4	c.318G>A	p.Val106Val	29.72
MtDNA	8429	A	G	synonymous_variant	LOW	ctc-1	WBGene00010964	MTCE.26	c.585A>G	p.Val195Val	29.65
III	12953329	T	G	missense_variant	MODERATE	ttm-1	WBGene00012712	Y39E4A.2b	c.1109A>C	p.Asn370Thr	29.59
III	12953329	T	G	missense_variant	MODERATE	ttm-1	WBGene00012712	Y39E4A.2c	c.878A>C	p.Asn293Thr	29.59
III	12953329	T	G	missense_variant	MODERATE	ttm-1	WBGene00012712	Y39E4A.2a	c.1052A>C	p.Asn351Thr	29.59
X	15227136	A	G	synonymous_variant	LOW	H03A11.2	WBGene00010357	H03A11.2	c.2883T>C	p.Gly961Gly	29.52
X	12341341	C	A	missense_variant	MODERATE	zig-2	WBGene00006979	F42F12.2	c.43G>T	p.Ala15Ser	29.48
V	6177134	G	C	missense_variant	MODERATE	ttn-1	WBGene00006436	W06H8.8g	c.20002C>G	p.Gln6668Glu	29.37
V	6177134	G	C	missense_variant	MODERATE	ttn-1	WBGene00006436	W06H8.8e.2	c.20002C>G	p.Gln6668Glu	29.37
V	6177134	G	C	missense_variant	MODERATE	ttn-1	WBGene00006436	W06H8.8f.2	c.20002C>G	p.Gln6668Glu	29.37
V	6177134	G	C	missense_variant	MODERATE	ttn-1	WBGene00006436	W06H8.8e.1	c.20002C>G	p.Gln6668Glu	29.37
V	6177134	G	C	missense_variant	MODERATE	ttn-1	WBGene00006436	W06H8.8f.1	c.20002C>G	p.Gln6668Glu	29.37
V	6177134	G	C	missense_variant	MODERATE	ttn-1	WBGene00006436	W06H8.8d	c.19942C>G	p.Gln6648Glu	29.37
I	10272518	A	T	synonymous_variant	LOW	ZC247.1	WBGene00013859	ZC247.1	c.5433T>A	p.Pro1811Pro	29.33
IV	7596508	T	A	missense_variant	MODERATE	tag-80	WBGene00018468	F45E4.3a	c.6809T>A	p.Val2270Asp	29.23
IV	7596508	T	A	missense_variant	MODERATE	tag-80	WBGene00018468	F45E4.3b	c.6809T>A	p.Val2270Asp	29.23
V	5084757	G	A	missense_variant	MODERATE	Y58A7A.4	WBGene00021978	Y58A7A.4	c.251C>T	p.Pro84Leu	29.14
II	6549864	A	G	missense_variant	MODERATE	tag-184	WBGene00007050	F18C5.3	c.832A>G	p.Met278Val	29.02
IV	11226271	A	C	missense_variant	MODERATE	col-125	WBGene00000699	C29F4.1	c.686A>C	p.Gln229Pro	28.72
X	3812075	C	T	missense_variant	MODERATE	F35A5.1	WBGene00018024	F35A5.1	c.4610C>T	p.Ala1537Val	28.6
III	9889523	C	T	missense_variant	MODERATE	alg-4	WBGene00006449	ZK757.3a.1	c.1228G>A	p.Ala410Thr	28.54
III	9889523	C	T	missense_variant	MODERATE	alg-4	WBGene00006449	ZK757.3b	c.1219G>A	p.Ala407Thr	28.54
III	9889523	C	T	missense_variant	MODERATE	alg-4	WBGene00006449	ZK757.3a.2	c.1228G>A	p.Ala410Thr	28.54
II	6721813	G	C	stop_lost	HIGH	T14B4.t1	WBGene00023138	T14B4.t1	c.48G>C	p.Ter16Tyrext*?	28.52
I	12471097	C	G	missense_variant	MODERATE	T27F6.1	WBGene00012102	T27F6.1	c.1183G>C	p.Glu395Gln	28.5
IV	10950153	T	C	splice_region_variant&intron_variant	LOW	Y69E1A.2	WBGene00013474	Y69E1A.2	c.268+8T>C		28.36
V	16816504	T	C	splice_region_variant&intron_variant	LOW	T20B3.1	WBGene00011850	T20B3.1	c.381-3T>C		28.3
II	2036313	G	T	missense_variant	MODERATE	bath-19	WBGene00019132	F59H6.1	c.838C>A	p.Leu280Ile	28.12
V	5084669	T	C	synonymous_variant	LOW	Y58A7A.4	WBGene00021978	Y58A7A.4	c.291A>G	p.Thr97Thr	27.87
III	2405335	C	T	splice_region_variant&intron_variant	LOW	H14E04.1	WBGene00019198	H14E04.1	c.646-8C>T		27.77
I	4765814	A	G	missense_variant	MODERATE	M04F3.2	WBGene00019768	M04F3.2	c.61A>G	p.Thr21Ala	27.76
II	8185828	A	T	missense_variant	MODERATE	cct-1	WBGene00000377	T05C12.7	c.339A>T	p.Lys113Asn	27.73
IV	10950015	C	T	synonymous_variant	LOW	Y69E1A.2	WBGene00013474	Y69E1A.2	c.138C>T	p.His46His	27.68
IV	10949928	A	G	synonymous_variant	LOW	Y69E1A.2	WBGene00013474	Y69E1A.2	c.51A>G	p.Gly17Gly	27.55
V	19828988	T	C	synonymous_variant	LOW	pcp-4	WBGene00003959	Y116F11B.3	c.684A>G	p.Gln228Gln	27.52
II	6721812	A	C	stop_lost	HIGH	T14B4.t1	WBGene00023138	T14B4.t1	c.47A>C	p.Ter16Serext*?	27.46
V	6177095	G	C	missense_variant	MODERATE	ttn-1	WBGene00006436	W06H8.8g	c.20041C>G	p.Pro6681Ala	27.38
V	6177095	G	C	missense_variant	MODERATE	ttn-1	WBGene00006436	W06H8.8e.2	c.20041C>G	p.Pro6681Ala	27.38
V	6177095	G	C	missense_variant	MODERATE	ttn-1	WBGene00006436	W06H8.8f.2	c.20041C>G	p.Pro6681Ala	27.38
V	6177095	G	C	missense_variant	MODERATE	ttn-1	WBGene00006436	W06H8.8e.1	c.20041C>G	p.Pro6681Ala	27.38
V	6177095	G	C	missense_variant	MODERATE	ttn-1	WBGene00006436	W06H8.8f.1	c.20041C>G	p.Pro6681Ala	27.38
V	6177095	G	C	missense_variant	MODERATE	ttn-1	WBGene00006436	W06H8.8d	c.19981C>G	p.Pro6661Ala	27.38
IV	10950006	A	G	synonymous_variant	LOW	Y69E1A.2	WBGene00013474	Y69E1A.2	c.129A>G	p.Lys43Lys	27.34
II	6759972	C	G	missense_variant	MODERATE	F41G3.2	WBGene00018299	F41G3.2	c.569C>G	p.Pro190Arg	27.28
IV	10949934	A	C	synonymous_variant	LOW	Y69E1A.2	WBGene00013474	Y69E1A.2	c.57A>C	p.Pro19Pro	27.24
IV	10949930	C	T	missense_variant	MODERATE	Y69E1A.2	WBGene00013474	Y69E1A.2	c.53C>T	p.Ala18Val	27.23
V	8963428	C	G	missense_variant	MODERATE	nhr-44	WBGene00003634	T19A5.4	c.435G>C	p.Lys145Asn	27.22
II	7200976	C	T	synonymous_variant	LOW	E04F6.2	WBGene00017122	E04F6.2	c.207C>T	p.Ser69Ser	27.15
IV	7596309	A	C	missense_variant	MODERATE	tag-80	WBGene00018468	F45E4.3a	c.6610A>C	p.Thr2204Pro	27.08
IV	7596309	A	C	missense_variant	MODERATE	tag-80	WBGene00018468	F45E4.3b	c.6610A>C	p.Thr2204Pro	27.08
V	5084663	A	G	synonymous_variant	LOW	Y58A7A.4	WBGene00021978	Y58A7A.4	c.297T>C	p.Asp99Asp	26.94
V	6177141	A	G	synonymous_variant	LOW	ttn-1	WBGene00006436	W06H8.8g	c.19995T>C	p.Ser6665Ser	26.82
V	6177141	A	G	synonymous_variant	LOW	ttn-1	WBGene00006436	W06H8.8e.2	c.19995T>C	p.Ser6665Ser	26.82
V	6177141	A	G	synonymous_variant	LOW	ttn-1	WBGene00006436	W06H8.8f.2	c.19995T>C	p.Ser6665Ser	26.82
V	6177141	A	G	synonymous_variant	LOW	ttn-1	WBGene00006436	W06H8.8e.1	c.19995T>C	p.Ser6665Ser	26.82
V	6177141	A	G	synonymous_variant	LOW	ttn-1	WBGene00006436	W06H8.8f.1	c.19995T>C	p.Ser6665Ser	26.82
V	6177141	A	G	synonymous_variant	LOW	ttn-1	WBGene00006436	W06H8.8d	c.19935T>C	p.Ser6645Ser	26.82
X	3812048	A	C	missense_variant	MODERATE	F35A5.1	WBGene00018024	F35A5.1	c.4583A>C	p.Asp1528Ala	26.6
IV	7591680	T	A	missense_variant	MODERATE	tag-80	WBGene00018468	F45E4.3a	c.1981T>A	p.Cys661Ser	26.18
IV	7591680	T	A	missense_variant	MODERATE	tag-80	WBGene00018468	F45E4.3b	c.1981T>A	p.Cys661Ser	26.18
III	3167079	G	A	missense_variant	MODERATE	R148.5	WBGene00020104	R148.5a	c.292G>A	p.Gly98Ser	25.85
III	3167079	G	A	missense_variant	MODERATE	R148.5	WBGene00020104	R148.5b	c.292G>A	p.Gly98Ser	25.85
IV	10950432	G	A	synonymous_variant	LOW	Y69E1A.2	WBGene00013474	Y69E1A.2	c.507G>A	p.Gly169Gly	25.81
IV	7597128	A	T	missense_variant	MODERATE	tag-80	WBGene00018468	F45E4.3a	c.7365A>T	p.Glu2455Asp	25.79
IV	7597128	A	T	missense_variant	MODERATE	tag-80	WBGene00018468	F45E4.3b	c.7365A>T	p.Glu2455Asp	25.79
X	14717527	G	A	synonymous_variant	LOW	tag-53	WBGene00006432	F33C8.1a	c.3633G>A	p.Arg1211Arg	25.76
X	14717527	G	A	synonymous_variant	LOW	tag-53	WBGene00006432	F33C8.1b	c.3522G>A	p.Arg1174Arg	25.76
X	3812054	C	A	missense_variant	MODERATE	F35A5.1	WBGene00018024	F35A5.1	c.4589C>A	p.Pro1530Gln	25.65
II	2849019	C	T	missense_variant	MODERATE	ptc-3	WBGene00004210	Y110A2AL.8c	c.1798G>A	p.Glu600Lys	25.57
II	2849019	C	T	missense_variant	MODERATE	ptc-3	WBGene00004210	Y110A2AL.8a	c.1771G>A	p.Glu591Lys	25.57
II	2849019	C	T	missense_variant	MODERATE	ptc-3	WBGene00004210	Y110A2AL.8b	c.1771G>A	p.Glu591Lys	25.57
I	13209372	C	T	synonymous_variant	LOW	ZK1225.2	WBGene00014236	ZK1225.2	c.714C>T	p.Tyr238Tyr	25.41
V	5084654	C	A	missense_variant	MODERATE	Y58A7A.4	WBGene00021978	Y58A7A.4	c.306G>T	p.Lys102Asn	25.4
IV	10950941	A	G	synonymous_variant	LOW	Y69E1A.2	WBGene00013474	Y69E1A.2	c.966A>G	p.Ala322Ala	25.26
III	3387045	T	C	missense_variant	MODERATE	C56G7.2	WBGene00008347	C56G7.2	c.968A>G	p.Asn323Ser	25.14
V	5084806	C	A	missense_variant	MODERATE	Y58A7A.4	WBGene00021978	Y58A7A.4	c.202G>T	p.Ala68Ser	25.07
I	10271831	T	C	synonymous_variant	LOW	ZC247.1	WBGene00013859	ZC247.1	c.6120A>G	p.Lys2040Lys	24.95
II	6759973	G	A	synonymous_variant	LOW	F41G3.2	WBGene00018299	F41G3.2	c.570G>A	p.Pro190Pro	24.86
IV	7597770	G	A	synonymous_variant	LOW	tag-80	WBGene00018468	F45E4.3a	c.8004G>A	p.Pro2668Pro	24.86
IV	7597770	G	A	synonymous_variant	LOW	tag-80	WBGene00018468	F45E4.3b	c.8004G>A	p.Pro2668Pro	24.86
IV	11100234	A	C	stop_gained	HIGH	str-3	WBGene00006071	M7.13	c.138T>G	p.Tyr46*	24.74
X	3812118	T	A	synonymous_variant	LOW	F35A5.1	WBGene00018024	F35A5.1	c.4653T>A	p.Pro1551Pro	24.6
III	11029199	C	T	missense_variant	MODERATE	Y48A6B.8	WBGene00012969	Y48A6B.8	c.193G>A	p.Glu65Lys	24.24
II	13440675	G	T	missense_variant	MODERATE	tbc-15	WBGene00013016	Y48E1C.3	c.263C>A	p.Thr88Lys	23.83
X	9460253	A	C	missense_variant	MODERATE	ZK899.5	WBGene00014143	ZK899.5	c.585T>G	p.Asp195Glu	23.8
V	6178476	A	T	missense_variant	MODERATE	ttn-1	WBGene00006436	W06H8.8g	c.18660T>A	p.His6220Gln	23.56
V	6178476	A	T	missense_variant	MODERATE	ttn-1	WBGene00006436	W06H8.8e.2	c.18660T>A	p.His6220Gln	23.56
V	6178476	A	T	missense_variant	MODERATE	ttn-1	WBGene00006436	W06H8.8f.2	c.18660T>A	p.His6220Gln	23.56
V	6178476	A	T	missense_variant	MODERATE	ttn-1	WBGene00006436	W06H8.8e.1	c.18660T>A	p.His6220Gln	23.56
V	6178476	A	T	missense_variant	MODERATE	ttn-1	WBGene00006436	W06H8.8f.1	c.18660T>A	p.His6220Gln	23.56
V	6178476	A	T	missense_variant	MODERATE	ttn-1	WBGene00006436	W06H8.8d	c.18600T>A	p.His6200Gln	23.56
II	3833269	C	T	missense_variant	MODERATE	oac-4	WBGene00015873	C17A2.5	c.2177G>A	p.Ser726Asn	23.47
MtDNA	1897	G	A	missense_variant	MODERATE	nduo-1	WBGene00010959	MTCE.11	c.135G>A	p.Met45Ile	23.07
IV	10950126	A	T	synonymous_variant	LOW	Y69E1A.2	WBGene00013474	Y69E1A.2	c.249A>T	p.Val83Val	22.87
II	3833262	G	A	synonymous_variant	LOW	oac-4	WBGene00015873	C17A2.5	c.2184C>T	p.Cys728Cys	22.4
II	3833289	T	G	missense_variant	MODERATE	oac-4	WBGene00015873	C17A2.5	c.2157A>C	p.Gln719His	22.29
II	12606144	G	A	missense_variant	MODERATE	lips-15	WBGene00012585	Y38E10A.7	c.169G>A	p.Asp57Asn	22.2
II	12606145	A	C	missense_variant	MODERATE	lips-15	WBGene00012585	Y38E10A.7	c.170A>C	p.Asp57Ala	22.2
II	3568843	T	G	missense_variant	MODERATE	clec-127	WBGene00021138	W10G11.5	c.323A>C	p.Gln108Pro	22.19
V	6173442	G	A	synonymous_variant	LOW	ttn-1	WBGene00006436	W06H8.8g	c.23694C>T	p.Asp7898Asp	22.19
V	6173442	G	A	synonymous_variant	LOW	ttn-1	WBGene00006436	W06H8.8e.2	c.23694C>T	p.Asp7898Asp	22.19
V	6173442	G	A	synonymous_variant	LOW	ttn-1	WBGene00006436	W06H8.8f.2	c.23694C>T	p.Asp7898Asp	22.19
V	6173442	G	A	synonymous_variant	LOW	ttn-1	WBGene00006436	W06H8.8e.1	c.23694C>T	p.Asp7898Asp	22.19
V	6173442	G	A	synonymous_variant	LOW	ttn-1	WBGene00006436	W06H8.8f.1	c.23694C>T	p.Asp7898Asp	22.19
V	6173442	G	A	synonymous_variant	LOW	ttn-1	WBGene00006436	W06H8.8d	c.23634C>T	p.Asp7878Asp	22.19
V	6173449	T	A	missense_variant	MODERATE	ttn-1	WBGene00006436	W06H8.8g	c.23687A>T	p.Glu7896Val	22.19
V	6173449	T	A	missense_variant	MODERATE	ttn-1	WBGene00006436	W06H8.8e.2	c.23687A>T	p.Glu7896Val	22.19
V	6173449	T	A	missense_variant	MODERATE	ttn-1	WBGene00006436	W06H8.8f.2	c.23687A>T	p.Glu7896Val	22.19
V	6173449	T	A	missense_variant	MODERATE	ttn-1	WBGene00006436	W06H8.8e.1	c.23687A>T	p.Glu7896Val	22.19
V	6173449	T	A	missense_variant	MODERATE	ttn-1	WBGene00006436	W06H8.8f.1	c.23687A>T	p.Glu7896Val	22.19
V	6173449	T	A	missense_variant	MODERATE	ttn-1	WBGene00006436	W06H8.8d	c.23627A>T	p.Glu7876Val	22.19
II	12606134	G	A	synonymous_variant	LOW	lips-15	WBGene00012585	Y38E10A.7	c.159G>A	p.Gly53Gly	22.06
II	12606137	A	G	synonymous_variant	LOW	lips-15	WBGene00012585	Y38E10A.7	c.162A>G	p.Gly54Gly	22.06
II	3833258	C	T	missense_variant	MODERATE	oac-4	WBGene00015873	C17A2.5	c.2188G>A	p.Ala730Thr	21.95
II	3568839	A	G	synonymous_variant	LOW	clec-127	WBGene00021138	W10G11.5	c.327T>C	p.Leu109Leu	21.84
II	3568841	G	T	missense_variant	MODERATE	clec-127	WBGene00021138	W10G11.5	c.325C>A	p.Leu109Ile	21.84
I	10270601	A	G	synonymous_variant	LOW	ZC247.1	WBGene00013859	ZC247.1	c.7350T>C	p.Ile2450Ile	21.81
I	10270581	G	A	missense_variant	MODERATE	ZC247.1	WBGene00013859	ZC247.1	c.7370C>T	p.Ser2457Phe	21.61
I	10269046	A	C	missense_variant	MODERATE	ZC247.1	WBGene00013859	ZC247.1	c.8905T>G	p.Phe2969Val	21.49
II	3833313	A	G	synonymous_variant	LOW	oac-4	WBGene00015873	C17A2.5	c.2133T>C	p.His711His	21.3
I	4765836	C	T	missense_variant	MODERATE	M04F3.2	WBGene00019768	M04F3.2	c.83C>T	p.Pro28Leu	21.18
I	4765837	T	G	synonymous_variant	LOW	M04F3.2	WBGene00019768	M04F3.2	c.84T>G	p.Pro28Pro	21.18
II	12606209	A	T	splice_region_variant&intron_variant	LOW	lips-15	WBGene00012585	Y38E10A.7	c.189-3A>T		20.94
II	3568848	G	T	synonymous_variant	LOW	clec-127	WBGene00021138	W10G11.5	c.318C>A	p.Ser106Ser	20.51
II	3833318	G	T	missense_variant	MODERATE	oac-4	WBGene00015873	C17A2.5	c.2128C>A	p.Gln710Lys	20.28
I	10271396	G	A	synonymous_variant	LOW	ZC247.1	WBGene00013859	ZC247.1	c.6555C>T	p.Ser2185Ser	19.52
II	3833327	A	T	missense_variant	MODERATE	oac-4	WBGene00015873	C17A2.5	c.2119T>A	p.Ser707Thr	19.35
II	3833250	C	T	splice_region_variant&stop_retained_variant	LOW	oac-4	WBGene00015873	C17A2.5	c.2196G>A	p.Ter732Ter	19.33
II	12606075	T	A	missense_variant	MODERATE	lips-15	WBGene00012585	Y38E10A.7	c.100T>A	p.Ser34Thr	19.21
I	10276686	C	T	synonymous_variant	LOW	ZC247.1	WBGene00013859	ZC247.1	c.1305G>A	p.Lys435Lys	19.09
II	3568850	A	T	missense_variant	MODERATE	clec-127	WBGene00021138	W10G11.5	c.316T>A	p.Ser106Thr	19.04
II	3833330	A	T	missense_variant	MODERATE	oac-4	WBGene00015873	C17A2.5	c.2116T>A	p.Phe706Ile	18.86
II	12606079	C	G	missense_variant	MODERATE	lips-15	WBGene00012585	Y38E10A.7	c.104C>G	p.Ala35Gly	18.84
II	3833561	A	C	splice_region_variant&intron_variant	LOW	oac-4	WBGene00015873	C17A2.5	c.1932+7T>G		18.62
I	238168	G	A	synonymous_variant	LOW	Y48G1BM.6	WBGene00021671	Y48G1BM.6	c.85C>T	p.Leu29Leu	18.16
II	12606222	G	A	missense_variant	MODERATE	lips-15	WBGene00012585	Y38E10A.7	c.199G>A	p.Val67Ile	18.12
II	12606225	A	G	missense_variant	MODERATE	lips-15	WBGene00012585	Y38E10A.7	c.202A>G	p.Ile68Val	18.12
IV	16788371	G	T	missense_variant	MODERATE	Y43D4A.6	WBGene00012792	Y43D4A.6	c.848G>T	p.Arg283Leu	18.06
IV	16788372	T	C	synonymous_variant	LOW	Y43D4A.6	WBGene00012792	Y43D4A.6	c.849T>C	p.Arg283Arg	18.06
IV	16788373	A	C	synonymous_variant	LOW	Y43D4A.6	WBGene00012792	Y43D4A.6	c.850A>C	p.Arg284Arg	18.06
II	3833570	T	C	missense_variant&splice_region_variant	MODERATE	oac-4	WBGene00015873	C17A2.5	c.1930A>G	p.Asn644Asp	17.79
II	7123751	A	G	synonymous_variant	LOW	F10E7.2	WBGene00017344	F10E7.2	c.213A>G	p.Gln71Gln	17.77
II	3568853	G	T	missense_variant	MODERATE	clec-127	WBGene00021138	W10G11.5	c.313C>A	p.Pro105Thr	17.74
V	6174236	T	*,C	missense_variant	MODERATE	ttn-1	WBGene00006436	W06H8.8g	c.22900A>G	p.Asn7634Asp	17.7
V	6174236	T	*,C	missense_variant	MODERATE	ttn-1	WBGene00006436	W06H8.8e.2	c.22900A>G	p.Asn7634Asp	17.7
V	6174236	T	*,C	missense_variant	MODERATE	ttn-1	WBGene00006436	W06H8.8f.2	c.22900A>G	p.Asn7634Asp	17.7
V	6174236	T	*,C	missense_variant	MODERATE	ttn-1	WBGene00006436	W06H8.8e.1	c.22900A>G	p.Asn7634Asp	17.7
V	6174236	T	*,C	missense_variant	MODERATE	ttn-1	WBGene00006436	W06H8.8f.1	c.22900A>G	p.Asn7634Asp	17.7
V	6174236	T	*,C	missense_variant	MODERATE	ttn-1	WBGene00006436	W06H8.8d	c.22840A>G	p.Asn7614Asp	17.7
V	6177052	A	T	missense_variant	MODERATE	ttn-1	WBGene00006436	W06H8.8g	c.20084T>A	p.Leu6695His	17.59
V	6177052	A	T	missense_variant	MODERATE	ttn-1	WBGene00006436	W06H8.8e.2	c.20084T>A	p.Leu6695His	17.59
V	6177052	A	T	missense_variant	MODERATE	ttn-1	WBGene00006436	W06H8.8f.2	c.20084T>A	p.Leu6695His	17.59
V	6177052	A	T	missense_variant	MODERATE	ttn-1	WBGene00006436	W06H8.8e.1	c.20084T>A	p.Leu6695His	17.59
V	6177052	A	T	missense_variant	MODERATE	ttn-1	WBGene00006436	W06H8.8f.1	c.20084T>A	p.Leu6695His	17.59
V	6177052	A	T	missense_variant	MODERATE	ttn-1	WBGene00006436	W06H8.8d	c.20024T>A	p.Leu6675His	17.59
IV	7597999	G	A	missense_variant	MODERATE	tag-80	WBGene00018468	F45E4.3a	c.8233G>A	p.Ala2745Thr	17.55
IV	7597999	G	A	missense_variant	MODERATE	tag-80	WBGene00018468	F45E4.3b	c.8233G>A	p.Ala2745Thr	17.55
V	6174160	G	C	missense_variant	MODERATE	ttn-1	WBGene00006436	W06H8.8g	c.22976C>G	p.Ala7659Gly	17.47
V	6174160	G	C	missense_variant	MODERATE	ttn-1	WBGene00006436	W06H8.8e.2	c.22976C>G	p.Ala7659Gly	17.47
V	6174160	G	C	missense_variant	MODERATE	ttn-1	WBGene00006436	W06H8.8f.2	c.22976C>G	p.Ala7659Gly	17.47
V	6174160	G	C	missense_variant	MODERATE	ttn-1	WBGene00006436	W06H8.8e.1	c.22976C>G	p.Ala7659Gly	17.47
V	6174160	G	C	missense_variant	MODERATE	ttn-1	WBGene00006436	W06H8.8f.1	c.22976C>G	p.Ala7659Gly	17.47
V	6174160	G	C	missense_variant	MODERATE	ttn-1	WBGene00006436	W06H8.8d	c.22916C>G	p.Ala7639Gly	17.47
V	6179549	T	A	missense_variant	MODERATE	ttn-1	WBGene00006436	W06H8.8g	c.17587A>T	p.Thr5863Ser	17.44
V	6179549	T	A	missense_variant	MODERATE	ttn-1	WBGene00006436	W06H8.8e.2	c.17587A>T	p.Thr5863Ser	17.44
V	6179549	T	A	missense_variant	MODERATE	ttn-1	WBGene00006436	W06H8.8f.2	c.17587A>T	p.Thr5863Ser	17.44
V	6179549	T	A	missense_variant	MODERATE	ttn-1	WBGene00006436	W06H8.8e.1	c.17587A>T	p.Thr5863Ser	17.44
V	6179549	T	A	missense_variant	MODERATE	ttn-1	WBGene00006436	W06H8.8f.1	c.17587A>T	p.Thr5863Ser	17.44
V	6179549	T	A	missense_variant	MODERATE	ttn-1	WBGene00006436	W06H8.8d	c.17527A>T	p.Thr5843Ser	17.44
V	6179551	G	C	missense_variant	MODERATE	ttn-1	WBGene00006436	W06H8.8g	c.17585C>G	p.Pro5862Arg	17.44
V	6179551	G	C	missense_variant	MODERATE	ttn-1	WBGene00006436	W06H8.8e.2	c.17585C>G	p.Pro5862Arg	17.44
V	6179551	G	C	missense_variant	MODERATE	ttn-1	WBGene00006436	W06H8.8f.2	c.17585C>G	p.Pro5862Arg	17.44
V	6179551	G	C	missense_variant	MODERATE	ttn-1	WBGene00006436	W06H8.8e.1	c.17585C>G	p.Pro5862Arg	17.44
V	6179551	G	C	missense_variant	MODERATE	ttn-1	WBGene00006436	W06H8.8f.1	c.17585C>G	p.Pro5862Arg	17.44
V	6179551	G	C	missense_variant	MODERATE	ttn-1	WBGene00006436	W06H8.8d	c.17525C>G	p.Pro5842Arg	17.44
IV	16788349	A	T	missense_variant&splice_region_variant	MODERATE	Y43D4A.6	WBGene00012792	Y43D4A.6	c.826A>T	p.Thr276Ser	17.42
IV	7591706	A	G	synonymous_variant	LOW	tag-80	WBGene00018468	F45E4.3a	c.2007A>G	p.Lys669Lys	17.36
IV	7591706	A	G	synonymous_variant	LOW	tag-80	WBGene00018468	F45E4.3b	c.2007A>G	p.Lys669Lys	17.36
II	3833355	C	T	missense_variant	MODERATE	oac-4	WBGene00015873	C17A2.5	c.2091G>A	p.Met697Ile	17.27
II	3833348	C	T	missense_variant	MODERATE	oac-4	WBGene00015873	C17A2.5	c.2098G>A	p.Glu700Lys	17.26
II	3835995	T	C	synonymous_variant	LOW	oac-4	WBGene00015873	C17A2.5	c.21A>G	p.Thr7Thr	17.22
II	3835997	T	G	missense_variant	MODERATE	oac-4	WBGene00015873	C17A2.5	c.19A>C	p.Thr7Pro	17.22
I	238077	T	G	missense_variant	MODERATE	Y48G1BM.6	WBGene00021671	Y48G1BM.6	c.176A>C	p.Lys59Thr	17.19
X	8846738	G	A	stop_gained	HIGH	C28G1.t2	WBGene00022948	C28G1.t2	c.18G>A	p.Trp6*	17.17
II	3106582	C	G	missense_variant	MODERATE	clec-122	WBGene00021290	Y25C1A.3	c.518C>G	p.Ala173Gly	17.14
III	9101378	T	A	missense_variant	MODERATE	ZK507.3	WBGene00013979	ZK507.3	c.12T>A	p.Ser4Arg	17.13
I	10267127	C	G	missense_variant	MODERATE	ZC247.1	WBGene00013859	ZC247.1	c.10824G>C	p.Leu3608Phe	17.12
I	10267129	A	G	synonymous_variant	LOW	ZC247.1	WBGene00013859	ZC247.1	c.10822T>C	p.Leu3608Leu	17.12
V	6174145	T	A	missense_variant	MODERATE	ttn-1	WBGene00006436	W06H8.8g	c.22991A>T	p.Glu7664Val	17.1
V	6174145	T	A	missense_variant	MODERATE	ttn-1	WBGene00006436	W06H8.8e.2	c.22991A>T	p.Glu7664Val	17.1
V	6174145	T	A	missense_variant	MODERATE	ttn-1	WBGene00006436	W06H8.8f.2	c.22991A>T	p.Glu7664Val	17.1
V	6174145	T	A	missense_variant	MODERATE	ttn-1	WBGene00006436	W06H8.8e.1	c.22991A>T	p.Glu7664Val	17.1
V	6174145	T	A	missense_variant	MODERATE	ttn-1	WBGene00006436	W06H8.8f.1	c.22991A>T	p.Glu7664Val	17.1
V	6174145	T	A	missense_variant	MODERATE	ttn-1	WBGene00006436	W06H8.8d	c.22931A>T	p.Glu7644Val	17.1
IV	7591619	C	T	synonymous_variant	LOW	tag-80	WBGene00018468	F45E4.3a	c.1920C>T	p.Asp640Asp	16.98
IV	7591619	C	T	synonymous_variant	LOW	tag-80	WBGene00018468	F45E4.3b	c.1920C>T	p.Asp640Asp	16.98
II	12606342	G	A	missense_variant	MODERATE	lips-15	WBGene00012585	Y38E10A.7	c.319G>A	p.Val107Ile	16.95
II	12606343	T	A	missense_variant	MODERATE	lips-15	WBGene00012585	Y38E10A.7	c.320T>A	p.Val107Asp	16.95
II	7123745	A	T	missense_variant	MODERATE	F10E7.2	WBGene00017344	F10E7.2	c.207A>T	p.Gln69His	16.9
I	238211	A	G	synonymous_variant	LOW	Y48G1BM.6	WBGene00021671	Y48G1BM.6	c.42T>C	p.Phe14Phe	16.89
II	3833577	T	C	synonymous_variant	LOW	oac-4	WBGene00015873	C17A2.5	c.1923A>G	p.Val641Val	16.84
I	238106	C	T	synonymous_variant	LOW	Y48G1BM.6	WBGene00021671	Y48G1BM.6	c.147G>A	p.Arg49Arg	16.59
I	232000	A	G	missense_variant	MODERATE	Y48G1BM.6	WBGene00021671	Y48G1BM.6	c.3472T>C	p.Tyr1158His	16.57
III	9101384	A	G	synonymous_variant	LOW	ZK507.3	WBGene00013979	ZK507.3	c.18A>G	p.Lys6Lys	16.57
II	12606344	T	C	synonymous_variant	LOW	lips-15	WBGene00012585	Y38E10A.7	c.321T>C	p.Val107Val	16.53
II	3833579	C	A	missense_variant	MODERATE	oac-4	WBGene00015873	C17A2.5	c.1921G>T	p.Val641Leu	16.41
I	238244	T	A	missense_variant	MODERATE	Y48G1BM.6	WBGene00021671	Y48G1BM.6	c.9A>T	p.Leu3Phe	16.38
IV	16785007	C	G	missense_variant	MODERATE	Y43D4A.5	WBGene00012791	Y43D4A.5a	c.4588C>G	p.Leu1530Val	16.37
IV	16785007	C	G	missense_variant	MODERATE	Y43D4A.5	WBGene00012791	Y43D4A.5b	c.1822C>G	p.Leu608Val	16.37
IV	16785007	C	G	missense_variant	MODERATE	Y43D4A.5	WBGene00012791	Y43D4A.5c	c.4543C>G	p.Leu1515Val	16.37
IV	16785007	C	G	missense_variant	MODERATE	Y43D4A.5	WBGene00012791	Y43D4A.5d	c.1777C>G	p.Leu593Val	16.37
I	10276705	G	T	missense_variant	MODERATE	ZC247.1	WBGene00013859	ZC247.1	c.1286C>A	p.Thr429Asn	16.21
II	3833471	C	A	missense_variant	MODERATE	oac-4	WBGene00015873	C17A2.5	c.1975G>T	p.Ala659Ser	16.1
I	10273448	C	T	synonymous_variant	LOW	ZC247.1	WBGene00013859	ZC247.1	c.4503G>A	p.Lys1501Lys	16.09
II	3834862	T	G	missense_variant	MODERATE	oac-4	WBGene00015873	C17A2.5	c.973A>C	p.Ile325Leu	16.04
II	3833581	A	G	missense_variant	MODERATE	oac-4	WBGene00015873	C17A2.5	c.1919T>C	p.Leu640Ser	15.99
I	238080	A	C	missense_variant	MODERATE	Y48G1BM.6	WBGene00021671	Y48G1BM.6	c.173T>G	p.Phe58Cys	15.93
II	12606581	T	A	synonymous_variant	LOW	lips-15	WBGene00012585	Y38E10A.7	c.558T>A	p.Gly186Gly	15.88
II	12606582	A	T	missense_variant	MODERATE	lips-15	WBGene00012585	Y38E10A.7	c.559A>T	p.Thr187Ser	15.88
I	238154	C	T	synonymous_variant	LOW	Y48G1BM.6	WBGene00021671	Y48G1BM.6	c.99G>A	p.Thr33Thr	15.81
III	9101445	T	C	splice_region_variant&intron_variant	LOW	ZK507.3	WBGene00013979	ZK507.3	c.71+8T>C		15.75
II	12606350	G	A	synonymous_variant	LOW	lips-15	WBGene00012585	Y38E10A.7	c.327G>A	p.Thr109Thr	15.73
I	231982	C	T	missense_variant	MODERATE	Y48G1BM.6	WBGene00021671	Y48G1BM.6	c.3490G>A	p.Val1164Met	15.67
I	238090	C	T	missense_variant	MODERATE	Y48G1BM.6	WBGene00021671	Y48G1BM.6	c.163G>A	p.Ala55Thr	15.61
I	238091	C	T	synonymous_variant	LOW	Y48G1BM.6	WBGene00021671	Y48G1BM.6	c.162G>A	p.Ala54Ala	15.61
II	12606352	C	T	missense_variant	MODERATE	lips-15	WBGene00012585	Y38E10A.7	c.329C>T	p.Ala110Val	15.6
V	6175437	A	C	missense_variant	MODERATE	ttn-1	WBGene00006436	W06H8.8g	c.21699T>G	p.Asn7233Lys	15.6
V	6175437	A	C	missense_variant	MODERATE	ttn-1	WBGene00006436	W06H8.8e.2	c.21699T>G	p.Asn7233Lys	15.6
V	6175437	A	C	missense_variant	MODERATE	ttn-1	WBGene00006436	W06H8.8f.2	c.21699T>G	p.Asn7233Lys	15.6
V	6175437	A	C	missense_variant	MODERATE	ttn-1	WBGene00006436	W06H8.8e.1	c.21699T>G	p.Asn7233Lys	15.6
V	6175437	A	C	missense_variant	MODERATE	ttn-1	WBGene00006436	W06H8.8f.1	c.21699T>G	p.Asn7233Lys	15.6
V	6175437	A	C	missense_variant	MODERATE	ttn-1	WBGene00006436	W06H8.8d	c.21639T>G	p.Asn7213Lys	15.6
I	10266776	G	A	synonymous_variant	LOW	ZC247.1	WBGene00013859	ZC247.1	c.11175C>T	p.Ser3725Ser	15.56
II	3833586	T	C	synonymous_variant	LOW	oac-4	WBGene00015873	C17A2.5	c.1914A>G	p.Ala638Ala	15.43
I	238087	T	C	missense_variant	MODERATE	Y48G1BM.6	WBGene00021671	Y48G1BM.6	c.166A>G	p.Thr56Ala	15.31
I	10266739	A	G	missense_variant	MODERATE	ZC247.1	WBGene00013859	ZC247.1	c.11212T>C	p.Tyr3738His	15.25
I	238081	A	T	missense_variant	MODERATE	Y48G1BM.6	WBGene00021671	Y48G1BM.6	c.172T>A	p.Phe58Ile	15.01
II	12606267	C	A	missense_variant	MODERATE	lips-15	WBGene00012585	Y38E10A.7	c.244C>A	p.Pro82Thr	14.99
II	12606626	A	G	synonymous_variant	LOW	lips-15	WBGene00012585	Y38E10A.7	c.603A>G	p.Thr201Thr	14.85
II	3833587	G	A	missense_variant	MODERATE	oac-4	WBGene00015873	C17A2.5	c.1913C>T	p.Ala638Val	14.84
I	238055	G	C	splice_region_variant&intron_variant	LOW	Y48G1BM.6	WBGene00021671	Y48G1BM.6	c.193+5C>G		14.7
II	12606619	T	C	missense_variant	MODERATE	lips-15	WBGene00012585	Y38E10A.7	c.596T>C	p.Val199Ala	14.58
V	6181047	A	T	missense_variant	MODERATE	ttn-1	WBGene00006436	W06H8.8g	c.16089T>A	p.Asp5363Glu	14.42
V	6181047	A	T	missense_variant	MODERATE	ttn-1	WBGene00006436	W06H8.8e.2	c.16089T>A	p.Asp5363Glu	14.42
V	6181047	A	T	missense_variant	MODERATE	ttn-1	WBGene00006436	W06H8.8f.2	c.16089T>A	p.Asp5363Glu	14.42
V	6181047	A	T	missense_variant	MODERATE	ttn-1	WBGene00006436	W06H8.8e.1	c.16089T>A	p.Asp5363Glu	14.42
V	6181047	A	T	missense_variant	MODERATE	ttn-1	WBGene00006436	W06H8.8f.1	c.16089T>A	p.Asp5363Glu	14.42
V	6181047	A	T	missense_variant	MODERATE	ttn-1	WBGene00006436	W06H8.8d	c.16089T>A	p.Asp5363Glu	14.42
V	6173464	G	C	missense_variant	MODERATE	ttn-1	WBGene00006436	W06H8.8g	c.23672C>G	p.Ala7891Gly	14.26
V	6173464	G	C	missense_variant	MODERATE	ttn-1	WBGene00006436	W06H8.8e.2	c.23672C>G	p.Ala7891Gly	14.26
V	6173464	G	C	missense_variant	MODERATE	ttn-1	WBGene00006436	W06H8.8f.2	c.23672C>G	p.Ala7891Gly	14.26
V	6173464	G	C	missense_variant	MODERATE	ttn-1	WBGene00006436	W06H8.8e.1	c.23672C>G	p.Ala7891Gly	14.26
V	6173464	G	C	missense_variant	MODERATE	ttn-1	WBGene00006436	W06H8.8f.1	c.23672C>G	p.Ala7891Gly	14.26
V	6173464	G	C	missense_variant	MODERATE	ttn-1	WBGene00006436	W06H8.8d	c.23612C>G	p.Ala7871Gly	14.26
IV	16787420	A	T	stop_gained	HIGH	Y43D4A.6	WBGene00012792	Y43D4A.6	c.94A>T	p.Lys32*	14.24
I	11629911	T	A	synonymous_variant	LOW	W04G5.3	WBGene00012264	W04G5.3	c.198T>A	p.Ile66Ile	13.95
X	8846775	C	T	stop_gained	HIGH	C28G1.t2	WBGene00022948	C28G1.t2	c.55C>T	p.Arg19*	13.93
III	5507102	G	T	missense_variant	MODERATE	D1044.7	WBGene00017032	D1044.7	c.1151C>A	p.Thr384Asn	13.9
I	232066	C	A	missense_variant	MODERATE	Y48G1BM.6	WBGene00021671	Y48G1BM.6	c.3406G>T	p.Ala1136Ser	13.86
II	3833755	T	C	missense_variant	MODERATE	oac-4	WBGene00015873	C17A2.5	c.1745A>G	p.His582Arg	13.84
I	238058	A	G	splice_donor_variant&intron_variant	HIGH	Y48G1BM.6	WBGene00021671	Y48G1BM.6	c.193+2T>C		13.83
II	12606021	G	A	missense_variant	MODERATE	lips-15	WBGene00012585	Y38E10A.7	c.46G>A	p.Ala16Thr	13.75
V	6174224	G	*,T	missense_variant	MODERATE	ttn-1	WBGene00006436	W06H8.8g	c.22912C>A	p.Gln7638Lys	13.55
V	6174224	G	*,T	missense_variant	MODERATE	ttn-1	WBGene00006436	W06H8.8e.2	c.22912C>A	p.Gln7638Lys	13.55
V	6174224	G	*,T	missense_variant	MODERATE	ttn-1	WBGene00006436	W06H8.8f.2	c.22912C>A	p.Gln7638Lys	13.55
V	6174224	G	*,T	missense_variant	MODERATE	ttn-1	WBGene00006436	W06H8.8e.1	c.22912C>A	p.Gln7638Lys	13.55
V	6174224	G	*,T	missense_variant	MODERATE	ttn-1	WBGene00006436	W06H8.8f.1	c.22912C>A	p.Gln7638Lys	13.55
V	6174224	G	*,T	missense_variant	MODERATE	ttn-1	WBGene00006436	W06H8.8d	c.22852C>A	p.Gln7618Lys	13.55
I	10273910	C	T	synonymous_variant	LOW	ZC247.1	WBGene00013859	ZC247.1	c.4041G>A	p.Lys1347Lys	13.52
II	3833775	A	C	synonymous_variant	LOW	oac-4	WBGene00015873	C17A2.5	c.1725T>G	p.Gly575Gly	13.47
I	11629874	C	T	missense_variant	MODERATE	W04G5.3	WBGene00012264	W04G5.3	c.161C>T	p.Ser54Phe	13.44
I	12027210	G	A	synonymous_variant	LOW	Y53C10A.10	WBGene00013138	Y53C10A.10	c.3684G>A	p.Pro1228Pro	13.41
X	8846784	T	C	missense_variant	MODERATE	C28G1.t2	WBGene00022948	C28G1.t2	c.64T>C	p.Ser22Pro	13.19
V	6174219	C	*,T	synonymous_variant	LOW	ttn-1	WBGene00006436	W06H8.8g	c.22917G>A	p.Lys7639Lys	13.12
V	6174219	C	*,T	synonymous_variant	LOW	ttn-1	WBGene00006436	W06H8.8e.2	c.22917G>A	p.Lys7639Lys	13.12
V	6174219	C	*,T	synonymous_variant	LOW	ttn-1	WBGene00006436	W06H8.8f.2	c.22917G>A	p.Lys7639Lys	13.12
V	6174219	C	*,T	synonymous_variant	LOW	ttn-1	WBGene00006436	W06H8.8e.1	c.22917G>A	p.Lys7639Lys	13.12
V	6174219	C	*,T	synonymous_variant	LOW	ttn-1	WBGene00006436	W06H8.8f.1	c.22917G>A	p.Lys7639Lys	13.12
V	6174219	C	*,T	synonymous_variant	LOW	ttn-1	WBGene00006436	W06H8.8d	c.22857G>A	p.Lys7619Lys	13.12
II	12606566	T	A	synonymous_variant	LOW	lips-15	WBGene00012585	Y38E10A.7	c.543T>A	p.Ala181Ala	13.1
V	6173469	A	G	synonymous_variant	LOW	ttn-1	WBGene00006436	W06H8.8g	c.23667T>C	p.Ala7889Ala	12.95
V	6173469	A	G	synonymous_variant	LOW	ttn-1	WBGene00006436	W06H8.8e.2	c.23667T>C	p.Ala7889Ala	12.95
V	6173469	A	G	synonymous_variant	LOW	ttn-1	WBGene00006436	W06H8.8f.2	c.23667T>C	p.Ala7889Ala	12.95
V	6173469	A	G	synonymous_variant	LOW	ttn-1	WBGene00006436	W06H8.8e.1	c.23667T>C	p.Ala7889Ala	12.95
V	6173469	A	G	synonymous_variant	LOW	ttn-1	WBGene00006436	W06H8.8f.1	c.23667T>C	p.Ala7889Ala	12.95
V	6173469	A	G	synonymous_variant	LOW	ttn-1	WBGene00006436	W06H8.8d	c.23607T>C	p.Ala7869Ala	12.95
II	3833745	T	C	synonymous_variant	LOW	oac-4	WBGene00015873	C17A2.5	c.1755A>G	p.Thr585Thr	12.9
II	3833747	T	C	missense_variant	MODERATE	oac-4	WBGene00015873	C17A2.5	c.1753A>G	p.Thr585Ala	12.9
IV	7591492	C	T	missense_variant	MODERATE	tag-80	WBGene00018468	F45E4.3a	c.1793C>T	p.Ser598Leu	12.88
IV	7591492	C	T	missense_variant	MODERATE	tag-80	WBGene00018468	F45E4.3b	c.1793C>T	p.Ser598Leu	12.88
II	3833761	T	C	missense_variant	MODERATE	oac-4	WBGene00015873	C17A2.5	c.1739A>G	p.Glu580Gly	12.84
II	3833766	T	G	synonymous_variant	LOW	oac-4	WBGene00015873	C17A2.5	c.1734A>C	p.Ile578Ile	12.84
V	6181036	G	T	missense_variant	MODERATE	ttn-1	WBGene00006436	W06H8.8g	c.16100C>A	p.Thr5367Lys	12.73
V	6181036	G	T	missense_variant	MODERATE	ttn-1	WBGene00006436	W06H8.8e.2	c.16100C>A	p.Thr5367Lys	12.73
V	6181036	G	T	missense_variant	MODERATE	ttn-1	WBGene00006436	W06H8.8f.2	c.16100C>A	p.Thr5367Lys	12.73
V	6181036	G	T	missense_variant	MODERATE	ttn-1	WBGene00006436	W06H8.8e.1	c.16100C>A	p.Thr5367Lys	12.73
V	6181036	G	T	missense_variant	MODERATE	ttn-1	WBGene00006436	W06H8.8f.1	c.16100C>A	p.Thr5367Lys	12.73
V	6181036	G	T	missense_variant	MODERATE	ttn-1	WBGene00006436	W06H8.8d	c.16100C>A	p.Thr5367Lys	12.73
I	10266811	G	A	synonymous_variant	LOW	ZC247.1	WBGene00013859	ZC247.1	c.11140C>T	p.Leu3714Leu	12.68
X	1836813	A	G	synonymous_variant	LOW	T26C11.2	WBGene00020828	T26C11.2	c.477A>G	p.Lys159Lys	12.61
II	7447258	T	G	missense_variant	MODERATE	Y9D1A.1	WBGene00021186	Y9D1A.1	c.494T>G	p.Val165Gly	12.58
II	3833724	A	G	synonymous_variant	LOW	oac-4	WBGene00015873	C17A2.5	c.1776T>C	p.Asp592Asp	12.56
II	3833752	G	T	missense_variant	MODERATE	oac-4	WBGene00015873	C17A2.5	c.1748C>A	p.Thr583Lys	12.53
II	3835911	A	G	synonymous_variant	LOW	oac-4	WBGene00015873	C17A2.5	c.105T>C	p.Asn35Asn	12.5
II	12606543	A	G	missense_variant	MODERATE	lips-15	WBGene00012585	Y38E10A.7	c.520A>G	p.Ile174Val	12.49
II	12606660	G	A	missense_variant	MODERATE	lips-15	WBGene00012585	Y38E10A.7	c.637G>A	p.Asp213Asn	12.49
II	12606661	A	C	missense_variant	MODERATE	lips-15	WBGene00012585	Y38E10A.7	c.638A>C	p.Asp213Ala	12.49
I	10275824	C	G	synonymous_variant	LOW	ZC247.1	WBGene00013859	ZC247.1	c.2127G>C	p.Ser709Ser	12.45
I	10275828	G	A	missense_variant	MODERATE	ZC247.1	WBGene00013859	ZC247.1	c.2123C>T	p.Ala708Val	12.45
II	7123715	T	G	missense_variant	MODERATE	F10E7.2	WBGene00017344	F10E7.2	c.177T>G	p.Cys59Trp	12.38
X	9078292	A	G	synonymous_variant	LOW	F47E1.t1	WBGene00023052	F47E1.t1	c.34T>C	p.Leu12Leu	12.33
V	6174216	C	*,A	missense_variant	MODERATE	ttn-1	WBGene00006436	W06H8.8g	c.22920G>T	p.Glu7640Asp	12.29
V	6174216	C	*,A	missense_variant	MODERATE	ttn-1	WBGene00006436	W06H8.8e.2	c.22920G>T	p.Glu7640Asp	12.29
V	6174216	C	*,A	missense_variant	MODERATE	ttn-1	WBGene00006436	W06H8.8f.2	c.22920G>T	p.Glu7640Asp	12.29
V	6174216	C	*,A	missense_variant	MODERATE	ttn-1	WBGene00006436	W06H8.8e.1	c.22920G>T	p.Glu7640Asp	12.29
V	6174216	C	*,A	missense_variant	MODERATE	ttn-1	WBGene00006436	W06H8.8f.1	c.22920G>T	p.Glu7640Asp	12.29
V	6174216	C	*,A	missense_variant	MODERATE	ttn-1	WBGene00006436	W06H8.8d	c.22860G>T	p.Glu7620Asp	12.29
II	3835938	A	G	synonymous_variant	LOW	oac-4	WBGene00015873	C17A2.5	c.78T>C	p.Phe26Phe	12.28
I	11629866	A	T	missense_variant	MODERATE	W04G5.3	WBGene00012264	W04G5.3	c.153A>T	p.Leu51Phe	12.26
I	10273358	C	T	synonymous_variant	LOW	ZC247.1	WBGene00013859	ZC247.1	c.4593G>A	p.Lys1531Lys	12.2
II	3833749	G	A	missense_variant	MODERATE	oac-4	WBGene00015873	C17A2.5	c.1751C>T	p.Thr584Ile	12.19
IV	11144577	A	T	synonymous_variant	LOW	F01G4.4	WBGene00008503	F01G4.4b	c.1035A>T	p.Pro345Pro	12.13
IV	11144577	A	T	synonymous_variant	LOW	F01G4.4	WBGene00008503	F01G4.4a	c.1035A>T	p.Pro345Pro	12.13
I	10266820	A	C	missense_variant	MODERATE	ZC247.1	WBGene00013859	ZC247.1	c.11131T>G	p.Ser3711Ala	12.09
IV	11144984	G	T	missense_variant	MODERATE	F01G4.4	WBGene00008503	F01G4.4b	c.1442G>T	p.Arg481Ile	12.06
IV	11144984	G	T	missense_variant	MODERATE	F01G4.4	WBGene00008503	F01G4.4a	c.1442G>T	p.Arg481Ile	12.06
II	3833599	G	A	missense_variant	MODERATE	oac-4	WBGene00015873	C17A2.5	c.1901C>T	p.Ala634Val	12.01
IV	7594434	G	A	missense_variant	MODERATE	tag-80	WBGene00018468	F45E4.3a	c.4735G>A	p.Ala1579Thr	11.94
IV	7594434	G	A	missense_variant	MODERATE	tag-80	WBGene00018468	F45E4.3b	c.4735G>A	p.Ala1579Thr	11.94
II	3835927	G	A	missense_variant	MODERATE	oac-4	WBGene00015873	C17A2.5	c.89C>T	p.Pro30Leu	11.89
II	3835885	A	G	splice_region_variant&intron_variant	LOW	oac-4	WBGene00015873	C17A2.5	c.125+6T>C		11.8
III	9101487	C	A	missense_variant&splice_region_variant	MODERATE	ZK507.3	WBGene00013979	ZK507.3	c.72C>A	p.Asn24Lys	11.8
V	6181025	C	G	missense_variant	MODERATE	ttn-1	WBGene00006436	W06H8.8g	c.16111G>C	p.Glu5371Gln	11.78
V	6181025	C	G	missense_variant	MODERATE	ttn-1	WBGene00006436	W06H8.8e.2	c.16111G>C	p.Glu5371Gln	11.78
V	6181025	C	G	missense_variant	MODERATE	ttn-1	WBGene00006436	W06H8.8f.2	c.16111G>C	p.Glu5371Gln	11.78
V	6181025	C	G	missense_variant	MODERATE	ttn-1	WBGene00006436	W06H8.8e.1	c.16111G>C	p.Glu5371Gln	11.78
V	6181025	C	G	missense_variant	MODERATE	ttn-1	WBGene00006436	W06H8.8f.1	c.16111G>C	p.Glu5371Gln	11.78
V	6181025	C	G	missense_variant	MODERATE	ttn-1	WBGene00006436	W06H8.8d	c.16111G>C	p.Glu5371Gln	11.78
I	10273346	A	T	synonymous_variant	LOW	ZC247.1	WBGene00013859	ZC247.1	c.4605T>A	p.Ser1535Ser	11.73
II	3835923	T	C	synonymous_variant	LOW	oac-4	WBGene00015873	C17A2.5	c.93A>G	p.Ala31Ala	11.69
V	6179138	C	G	missense_variant	MODERATE	ttn-1	WBGene00006436	W06H8.8g	c.17998G>C	p.Glu6000Gln	11.66
V	6179138	C	G	missense_variant	MODERATE	ttn-1	WBGene00006436	W06H8.8e.2	c.17998G>C	p.Glu6000Gln	11.66
V	6179138	C	G	missense_variant	MODERATE	ttn-1	WBGene00006436	W06H8.8f.2	c.17998G>C	p.Glu6000Gln	11.66
V	6179138	C	G	missense_variant	MODERATE	ttn-1	WBGene00006436	W06H8.8e.1	c.17998G>C	p.Glu6000Gln	11.66
V	6179138	C	G	missense_variant	MODERATE	ttn-1	WBGene00006436	W06H8.8f.1	c.17998G>C	p.Glu6000Gln	11.66
V	6179138	C	G	missense_variant	MODERATE	ttn-1	WBGene00006436	W06H8.8d	c.17938G>C	p.Glu5980Gln	11.66
II	3835809	A	G	synonymous_variant	LOW	oac-4	WBGene00015873	C17A2.5	c.163T>C	p.Leu55Leu	11.41
II	3835945	A	C	missense_variant	MODERATE	oac-4	WBGene00015873	C17A2.5	c.71T>G	p.Leu24Arg	11.41
I	11629657	C	T	missense_variant	MODERATE	W04G5.3	WBGene00012264	W04G5.3	c.17C>T	p.Ser6Leu	11.36
I	10270550	A	T	missense_variant	MODERATE	ZC247.1	WBGene00013859	ZC247.1	c.7401T>A	p.Asp2467Glu	11.33
IV	7593194	A	G	synonymous_variant	LOW	tag-80	WBGene00018468	F45E4.3a	c.3495A>G	p.Gln1165Gln	11.32
IV	7593194	A	G	synonymous_variant	LOW	tag-80	WBGene00018468	F45E4.3b	c.3495A>G	p.Gln1165Gln	11.32
I	10274419	A	G	missense_variant	MODERATE	ZC247.1	WBGene00013859	ZC247.1	c.3532T>C	p.Phe1178Leu	11.3
II	12606638	A	C	missense_variant	MODERATE	lips-15	WBGene00012585	Y38E10A.7	c.615A>C	p.Lys205Asn	11.3
IV	7597974	T	A	missense_variant	MODERATE	tag-80	WBGene00018468	F45E4.3a	c.8208T>A	p.Asp2736Glu	11.26
IV	7597974	T	A	missense_variant	MODERATE	tag-80	WBGene00018468	F45E4.3b	c.8208T>A	p.Asp2736Glu	11.26
I	10269800	T	A	synonymous_variant	LOW	ZC247.1	WBGene00013859	ZC247.1	c.8151A>T	p.Pro2717Pro	11.24
IV	7593177	A	C	missense_variant	MODERATE	tag-80	WBGene00018468	F45E4.3a	c.3478A>C	p.Lys1160Gln	11.01
IV	7593177	A	C	missense_variant	MODERATE	tag-80	WBGene00018468	F45E4.3b	c.3478A>C	p.Lys1160Gln	11.01
II	12606839	A	T	synonymous_variant	LOW	lips-15	WBGene00012585	Y38E10A.7	c.765A>T	p.Ala255Ala	10.97
IV	7593195	A	G	missense_variant	MODERATE	tag-80	WBGene00018468	F45E4.3a	c.3496A>G	p.Thr1166Ala	10.94
IV	7593195	A	G	missense_variant	MODERATE	tag-80	WBGene00018468	F45E4.3b	c.3496A>G	p.Thr1166Ala	10.94
IV	7593197	A	T	synonymous_variant	LOW	tag-80	WBGene00018468	F45E4.3a	c.3498A>T	p.Thr1166Thr	10.94
IV	7593197	A	T	synonymous_variant	LOW	tag-80	WBGene00018468	F45E4.3b	c.3498A>T	p.Thr1166Thr	10.94
II	3835843	G	A	synonymous_variant	LOW	oac-4	WBGene00015873	C17A2.5	c.129C>T	p.Phe43Phe	10.92
IV	16787369	G	A	missense_variant	MODERATE	Y43D4A.6	WBGene00012792	Y43D4A.6	c.43G>A	p.Gly15Arg	10.9
I	5163007	C	T	synonymous_variant	LOW	let-630	WBGene00002804	Y110A7A.19	c.1674G>A	p.Leu558Leu	10.72
II	12606842	G	T	synonymous_variant	LOW	lips-15	WBGene00012585	Y38E10A.7	c.768G>T	p.Thr256Thr	10.69
II	12606845	C	A	synonymous_variant	LOW	lips-15	WBGene00012585	Y38E10A.7	c.771C>A	p.Ala257Ala	10.69
V	6171911	C	T	missense_variant	MODERATE	ttn-1	WBGene00006436	W06H8.8g	c.25225G>A	p.Ala8409Thr	10.66
V	6171911	C	T	missense_variant	MODERATE	ttn-1	WBGene00006436	W06H8.8e.2	c.25225G>A	p.Ala8409Thr	10.66
V	6171911	C	T	missense_variant	MODERATE	ttn-1	WBGene00006436	W06H8.8f.2	c.25225G>A	p.Ala8409Thr	10.66
V	6171911	C	T	missense_variant	MODERATE	ttn-1	WBGene00006436	W06H8.8e.1	c.25225G>A	p.Ala8409Thr	10.66
V	6171911	C	T	missense_variant	MODERATE	ttn-1	WBGene00006436	W06H8.8f.1	c.25225G>A	p.Ala8409Thr	10.66
V	6171911	C	T	missense_variant	MODERATE	ttn-1	WBGene00006436	W06H8.8d	c.25165G>A	p.Ala8389Thr	10.66
I	10269901	T	A	missense_variant	MODERATE	ZC247.1	WBGene00013859	ZC247.1	c.8050A>T	p.Met2684Leu	10.45
IV	7594409	T	A	missense_variant	MODERATE	tag-80	WBGene00018468	F45E4.3a	c.4710T>A	p.Asp1570Glu	10.35
IV	7594409	T	A	missense_variant	MODERATE	tag-80	WBGene00018468	F45E4.3b	c.4710T>A	p.Asp1570Glu	10.35
II	12606848	A	G	synonymous_variant	LOW	lips-15	WBGene00012585	Y38E10A.7	c.774A>G	p.Glu258Glu	10.18
II	12606855	A	G	missense_variant&splice_region_variant	MODERATE	lips-15	WBGene00012585	Y38E10A.7	c.781A>G	p.Asn261Asp	10.18
I	10269814	A	G	synonymous_variant	LOW	ZC247.1	WBGene00013859	ZC247.1	c.8137T>C	p.Leu2713Leu	10.05
II	3833996	C	T	synonymous_variant	LOW	oac-4	WBGene00015873	C17A2.5	c.1593G>A	p.Leu531Leu	9.89
II	3833998	G	A	synonymous_variant	LOW	oac-4	WBGene00015873	C17A2.5	c.1591C>T	p.Leu531Leu	9.89
I	12027227	A	G	missense_variant	MODERATE	Y53C10A.10	WBGene00013138	Y53C10A.10	c.3701A>G	p.Asn1234Ser	9.83
IV	7595734	C	A	missense_variant	MODERATE	tag-80	WBGene00018468	F45E4.3a	c.6035C>A	p.Ala2012Asp	9.79
IV	7595734	C	A	missense_variant	MODERATE	tag-80	WBGene00018468	F45E4.3b	c.6035C>A	p.Ala2012Asp	9.79
IV	7592640	G	A	missense_variant	MODERATE	tag-80	WBGene00018468	F45E4.3a	c.2941G>A	p.Val981Ile	9.71
IV	7592640	G	A	missense_variant	MODERATE	tag-80	WBGene00018468	F45E4.3b	c.2941G>A	p.Val981Ile	9.71
IV	7598124	T	C	synonymous_variant	LOW	tag-80	WBGene00018468	F45E4.3a	c.8358T>C	p.His2786His	9.61
IV	7598124	T	C	synonymous_variant	LOW	tag-80	WBGene00018468	F45E4.3b	c.8358T>C	p.His2786His	9.61
IV	7598490	G	A	synonymous_variant	LOW	tag-80	WBGene00018468	F45E4.3a	c.8724G>A	p.Arg2908Arg	9.57
IV	7598490	G	A	synonymous_variant	LOW	tag-80	WBGene00018468	F45E4.3b	c.8724G>A	p.Arg2908Arg	9.57
II	3833913	A	T	missense_variant	MODERATE	oac-4	WBGene00015873	C17A2.5	c.1627T>A	p.Phe543Ile	9.56
IV	7594361	G	A	synonymous_variant	LOW	tag-80	WBGene00018468	F45E4.3a	c.4662G>A	p.Arg1554Arg	9.53
IV	7594361	G	A	synonymous_variant	LOW	tag-80	WBGene00018468	F45E4.3b	c.4662G>A	p.Arg1554Arg	9.53
II	12606673	A	G	missense_variant	MODERATE	lips-15	WBGene00012585	Y38E10A.7	c.650A>G	p.Asp217Gly	9.52
I	10275315	G	T	missense_variant	MODERATE	ZC247.1	WBGene00013859	ZC247.1	c.2636C>A	p.Thr879Asn	9.42
IV	7591688	A	T	missense_variant	MODERATE	tag-80	WBGene00018468	F45E4.3a	c.1989A>T	p.Glu663Asp	9.4
IV	7591688	A	T	missense_variant	MODERATE	tag-80	WBGene00018468	F45E4.3b	c.1989A>T	p.Glu663Asp	9.4
IV	7599133	T	C	synonymous_variant	LOW	tag-80	WBGene00018468	F45E4.3a	c.9363T>C	p.Ala3121Ala	9.4
IV	7599133	T	C	synonymous_variant	LOW	tag-80	WBGene00018468	F45E4.3b	c.9363T>C	p.Ala3121Ala	9.4
V	6178599	T	C	synonymous_variant	LOW	ttn-1	WBGene00006436	W06H8.8g	c.18537A>G	p.Val6179Val	9.33
V	6178599	T	C	synonymous_variant	LOW	ttn-1	WBGene00006436	W06H8.8e.2	c.18537A>G	p.Val6179Val	9.33
V	6178599	T	C	synonymous_variant	LOW	ttn-1	WBGene00006436	W06H8.8f.2	c.18537A>G	p.Val6179Val	9.33
V	6178599	T	C	synonymous_variant	LOW	ttn-1	WBGene00006436	W06H8.8e.1	c.18537A>G	p.Val6179Val	9.33
V	6178599	T	C	synonymous_variant	LOW	ttn-1	WBGene00006436	W06H8.8f.1	c.18537A>G	p.Val6179Val	9.33
V	6178599	T	C	synonymous_variant	LOW	ttn-1	WBGene00006436	W06H8.8d	c.18477A>G	p.Val6159Val	9.33
II	3835962	A	G	synonymous_variant	LOW	oac-4	WBGene00015873	C17A2.5	c.54T>C	p.Leu18Leu	9.24
I	238637	A	G	synonymous_variant	LOW	Y48G1BM.7	WBGene00021672	Y48G1BM.7	c.315T>C	p.Ser105Ser	9.18
II	12606860	C	T	splice_region_variant&intron_variant	LOW	lips-15	WBGene00012585	Y38E10A.7	c.783+3C>T		9.12
II	3833907	G	C	missense_variant	MODERATE	oac-4	WBGene00015873	C17A2.5	c.1633C>G	p.Arg545Gly	9.11
V	6171921	G	C	synonymous_variant	LOW	ttn-1	WBGene00006436	W06H8.8g	c.25215C>G	p.Leu8405Leu	9.04
V	6171921	G	C	synonymous_variant	LOW	ttn-1	WBGene00006436	W06H8.8e.2	c.25215C>G	p.Leu8405Leu	9.04
V	6171921	G	C	synonymous_variant	LOW	ttn-1	WBGene00006436	W06H8.8f.2	c.25215C>G	p.Leu8405Leu	9.04
V	6171921	G	C	synonymous_variant	LOW	ttn-1	WBGene00006436	W06H8.8e.1	c.25215C>G	p.Leu8405Leu	9.04
V	6171921	G	C	synonymous_variant	LOW	ttn-1	WBGene00006436	W06H8.8f.1	c.25215C>G	p.Leu8405Leu	9.04
V	6171921	G	C	synonymous_variant	LOW	ttn-1	WBGene00006436	W06H8.8d	c.25155C>G	p.Leu8385Leu	9.04
I	237848	T	G	missense_variant	MODERATE	Y48G1BM.6	WBGene00021671	Y48G1BM.6	c.199A>C	p.Thr67Pro	8.97
I	237851	G	A	missense_variant&splice_region_variant	MODERATE	Y48G1BM.6	WBGene00021671	Y48G1BM.6	c.196C>T	p.His66Tyr	8.97
II	3833881	A	G	synonymous_variant	LOW	oac-4	WBGene00015873	C17A2.5	c.1659T>C	p.Phe553Phe	8.84
II	3833884	T	G	missense_variant	MODERATE	oac-4	WBGene00015873	C17A2.5	c.1656A>C	p.Lys552Asn	8.84
I	4765851	A	T	splice_region_variant&intron_variant	LOW	M04F3.2	WBGene00019768	M04F3.2	c.91+7A>T		8.81
V	8707719	G	A	missense_variant	MODERATE	ZC178.2	WBGene00022536	ZC178.2	c.2162C>T	p.Ser721Phe	8.7
II	3833887	G	A	synonymous_variant	LOW	oac-4	WBGene00015873	C17A2.5	c.1653C>T	p.Asp551Asp	8.58
X	15748050	T	A	missense_variant	MODERATE	ZK678.t2	WBGene00014627	ZK678.t2	c.20T>A	p.Phe7Tyr	8.55
IV	7598177	C	A	missense_variant	MODERATE	tag-80	WBGene00018468	F45E4.3a	c.8411C>A	p.Thr2804Lys	8.39
IV	7598177	C	A	missense_variant	MODERATE	tag-80	WBGene00018468	F45E4.3b	c.8411C>A	p.Thr2804Lys	8.39
II	3833857	C	A	missense_variant	MODERATE	oac-4	WBGene00015873	C17A2.5	c.1683G>T	p.Lys561Asn	8.35
II	7367587	G	A	synonymous_variant	LOW	F43E2.6	WBGene00018394	F43E2.6a	c.198C>T	p.Gly66Gly	8.34
II	7367587	G	A	synonymous_variant	LOW	F43E2.6	WBGene00018394	F43E2.6b.1	c.174C>T	p.Gly58Gly	8.34
II	7367587	G	A	synonymous_variant	LOW	F43E2.6	WBGene00018394	F43E2.6b.2	c.174C>T	p.Gly58Gly	8.34
II	3833877	C	T	missense_variant	MODERATE	oac-4	WBGene00015873	C17A2.5	c.1663G>A	p.Glu555Lys	8.08
II	7367579	T	C	missense_variant	MODERATE	F43E2.6	WBGene00018394	F43E2.6a	c.206A>G	p.Asp69Gly	8.08
II	7367579	T	C	missense_variant	MODERATE	F43E2.6	WBGene00018394	F43E2.6b.1	c.182A>G	p.Asp61Gly	8.08
II	7367579	T	C	missense_variant	MODERATE	F43E2.6	WBGene00018394	F43E2.6b.2	c.182A>G	p.Asp61Gly	8.08
I	12027239	A	G	missense_variant	MODERATE	Y53C10A.10	WBGene00013138	Y53C10A.10	c.3713A>G	p.Glu1238Gly	7.99
IV	7598170	G	A	missense_variant	MODERATE	tag-80	WBGene00018468	F45E4.3a	c.8404G>A	p.Ala2802Thr	7.99
IV	7598170	G	A	missense_variant	MODERATE	tag-80	WBGene00018468	F45E4.3b	c.8404G>A	p.Ala2802Thr	7.99
X	3812218	A	G	missense_variant	MODERATE	F35A5.1	WBGene00018024	F35A5.1	c.4753A>G	p.Arg1585Gly	7.98
V	5755525	G	T	missense_variant	MODERATE	K09H11.11	WBGene00044541	K09H11.11	c.34C>A	p.Gln12Lys	7.9
I	10274917	T	A	missense_variant	MODERATE	ZC247.1	WBGene00013859	ZC247.1	c.3034A>T	p.Thr1012Ser	7.81
III	9101511	C	T	synonymous_variant	LOW	ZK507.3	WBGene00013979	ZK507.3	c.96C>T	p.Gly32Gly	7.78
IV	7594894	A	C	missense_variant	MODERATE	tag-80	WBGene00018468	F45E4.3a	c.5195A>C	p.Lys1732Thr	7.7
IV	7594894	A	C	missense_variant	MODERATE	tag-80	WBGene00018468	F45E4.3b	c.5195A>C	p.Lys1732Thr	7.7
II	7367574	T	C	missense_variant	MODERATE	F43E2.6	WBGene00018394	F43E2.6a	c.211A>G	p.Asn71Asp	7.6
II	7367574	T	C	missense_variant	MODERATE	F43E2.6	WBGene00018394	F43E2.6b.1	c.187A>G	p.Asn63Asp	7.6
II	7367574	T	C	missense_variant	MODERATE	F43E2.6	WBGene00018394	F43E2.6b.2	c.187A>G	p.Asn63Asp	7.6
II	3833867	T	C	missense_variant	MODERATE	oac-4	WBGene00015873	C17A2.5	c.1673A>G	p.Lys558Arg	7.54
IV	7593768	G	A	missense_variant	MODERATE	tag-80	WBGene00018468	F45E4.3a	c.4069G>A	p.Val1357Ile	7.51
IV	7593768	G	A	missense_variant	MODERATE	tag-80	WBGene00018468	F45E4.3b	c.4069G>A	p.Val1357Ile	7.51
I	10270766	C	T	synonymous_variant	LOW	ZC247.1	WBGene00013859	ZC247.1	c.7185G>A	p.Pro2395Pro	7.22
III	9101520	A	T	synonymous_variant	LOW	ZK507.3	WBGene00013979	ZK507.3	c.105A>T	p.Gly35Gly	7.21
II	7367568	T	C	missense_variant	MODERATE	F43E2.6	WBGene00018394	F43E2.6a	c.217A>G	p.Met73Val	7.16
II	7367568	T	C	missense_variant	MODERATE	F43E2.6	WBGene00018394	F43E2.6b.1	c.193A>G	p.Met65Val	7.16
II	7367568	T	C	missense_variant	MODERATE	F43E2.6	WBGene00018394	F43E2.6b.2	c.193A>G	p.Met65Val	7.16
I	10270769	T	G	synonymous_variant	LOW	ZC247.1	WBGene00013859	ZC247.1	c.7182A>C	p.Gly2394Gly	7.13
IV	7595676	G	A	missense_variant	MODERATE	tag-80	WBGene00018468	F45E4.3a	c.5977G>A	p.Glu1993Lys	7.08
IV	7595676	G	A	missense_variant	MODERATE	tag-80	WBGene00018468	F45E4.3b	c.5977G>A	p.Glu1993Lys	7.08
I	10275065	C	T	synonymous_variant	LOW	ZC247.1	WBGene00013859	ZC247.1	c.2886G>A	p.Lys962Lys	6.84
IV	7595767	T	C	missense_variant	MODERATE	tag-80	WBGene00018468	F45E4.3a	c.6068T>C	p.Val2023Ala	6.84
IV	7595767	T	C	missense_variant	MODERATE	tag-80	WBGene00018468	F45E4.3b	c.6068T>C	p.Val2023Ala	6.84
II	3833828	C	T	splice_region_variant&intron_variant	LOW	oac-4	WBGene00015873	C17A2.5	c.1709+3G>A		6.7
II	3833845	C	T	synonymous_variant	LOW	oac-4	WBGene00015873	C17A2.5	c.1695G>A	p.Leu565Leu	6.7
II	3833863	A	G	synonymous_variant	LOW	oac-4	WBGene00015873	C17A2.5	c.1677T>C	p.Ala559Ala	6.7
I	10275860	A	T	synonymous_variant	LOW	ZC247.1	WBGene00013859	ZC247.1	c.2091T>A	p.Ser697Ser	6.62
I	5162917	A	T	stop_gained	HIGH	let-630	WBGene00002804	Y110A7A.19	c.1764T>A	p.Tyr588*	6.58
V	6171936	A	C	missense_variant	MODERATE	ttn-1	WBGene00006436	W06H8.8g	c.25200T>G	p.Asp8400Glu	6.57
V	6171936	A	C	missense_variant	MODERATE	ttn-1	WBGene00006436	W06H8.8e.2	c.25200T>G	p.Asp8400Glu	6.57
V	6171936	A	C	missense_variant	MODERATE	ttn-1	WBGene00006436	W06H8.8f.2	c.25200T>G	p.Asp8400Glu	6.57
V	6171936	A	C	missense_variant	MODERATE	ttn-1	WBGene00006436	W06H8.8e.1	c.25200T>G	p.Asp8400Glu	6.57
V	6171936	A	C	missense_variant	MODERATE	ttn-1	WBGene00006436	W06H8.8f.1	c.25200T>G	p.Asp8400Glu	6.57
V	6171936	A	C	missense_variant	MODERATE	ttn-1	WBGene00006436	W06H8.8d	c.25140T>G	p.Asp8380Glu	6.57
I	237845	T	G	missense_variant	MODERATE	Y48G1BM.6	WBGene00021671	Y48G1BM.6	c.202A>C	p.Thr68Pro	6.53
II	3833823	G	A	splice_region_variant&intron_variant	LOW	oac-4	WBGene00015873	C17A2.5	c.1709+8C>T		6.53
X	9464036	T	G	missense_variant	MODERATE	ZK899.6	WBGene00014144	ZK899.6	c.585T>G	p.Asp195Glu	6.48
I	10269086	G	A	synonymous_variant	LOW	ZC247.1	WBGene00013859	ZC247.1	c.8865C>T	p.Ser2955Ser	6.4
IV	7595254	A	G	missense_variant	MODERATE	tag-80	WBGene00018468	F45E4.3a	c.5555A>G	p.Glu1852Gly	6.26
IV	7595254	A	G	missense_variant	MODERATE	tag-80	WBGene00018468	F45E4.3b	c.5555A>G	p.Glu1852Gly	6.26
II	3833976	T	A	splice_region_variant&intron_variant	LOW	oac-4	WBGene00015873	C17A2.5	c.1609+4A>T		6.25
IV	10489802	C	T	missense_variant	MODERATE	ced-5	WBGene00000419	C02F4.1	c.3365C>T	p.Thr1122Met	5.99
II	7123998	A	G	missense_variant	MODERATE	F10E7.2	WBGene00017344	F10E7.2	c.335A>G	p.Asp112Gly	5.88
IV	11145032	A	G	missense_variant	MODERATE	F01G4.4	WBGene00008503	F01G4.4b	c.1490A>G	p.Gln497Arg	5.86
IV	11145032	A	G	missense_variant	MODERATE	F01G4.4	WBGene00008503	F01G4.4a	c.1490A>G	p.Gln497Arg	5.86
I	10274501	A	T	synonymous_variant	LOW	ZC247.1	WBGene00013859	ZC247.1	c.3450T>A	p.Ser1150Ser	5.74
IV	11145033	A	G	synonymous_variant	LOW	F01G4.4	WBGene00008503	F01G4.4b	c.1491A>G	p.Gln497Gln	5.68
IV	11145033	A	G	synonymous_variant	LOW	F01G4.4	WBGene00008503	F01G4.4a	c.1491A>G	p.Gln497Gln	5.68
IV	7595545	C	T	missense_variant	MODERATE	tag-80	WBGene00018468	F45E4.3a	c.5846C>T	p.Ser1949Leu	5.67
IV	7595545	C	T	missense_variant	MODERATE	tag-80	WBGene00018468	F45E4.3b	c.5846C>T	p.Ser1949Leu	5.67
V	6178320	C	T	synonymous_variant	LOW	ttn-1	WBGene00006436	W06H8.8g	c.18816G>A	p.Lys6272Lys	5.55
V	6178320	C	T	synonymous_variant	LOW	ttn-1	WBGene00006436	W06H8.8e.2	c.18816G>A	p.Lys6272Lys	5.55
V	6178320	C	T	synonymous_variant	LOW	ttn-1	WBGene00006436	W06H8.8f.2	c.18816G>A	p.Lys6272Lys	5.55
V	6178320	C	T	synonymous_variant	LOW	ttn-1	WBGene00006436	W06H8.8e.1	c.18816G>A	p.Lys6272Lys	5.55
V	6178320	C	T	synonymous_variant	LOW	ttn-1	WBGene00006436	W06H8.8f.1	c.18816G>A	p.Lys6272Lys	5.55
V	6178320	C	T	synonymous_variant	LOW	ttn-1	WBGene00006436	W06H8.8d	c.18756G>A	p.Lys6252Lys	5.55
V	8702033	G	T	missense_variant	MODERATE	ZC178.1	WBGene00022535	ZC178.1	c.602G>T	p.Arg201Met	5.51
I	10274039	A	T	synonymous_variant	LOW	ZC247.1	WBGene00013859	ZC247.1	c.3912T>A	p.Ser1304Ser	5.28
IV	7595783	A	T	synonymous_variant	LOW	tag-80	WBGene00018468	F45E4.3a	c.6084A>T	p.Val2028Val	5.21
IV	7595783	A	T	synonymous_variant	LOW	tag-80	WBGene00018468	F45E4.3b	c.6084A>T	p.Val2028Val	5.21
I	10270012	A	T	missense_variant	MODERATE	ZC247.1	WBGene00013859	ZC247.1	c.7939T>A	p.Ser2647Thr	4.88
I	10271089	T	C	missense_variant	MODERATE	ZC247.1	WBGene00013859	ZC247.1	c.6862A>G	p.Asn2288Asp	4.78
IV	7595255	A	T	missense_variant	MODERATE	tag-80	WBGene00018468	F45E4.3a	c.5556A>T	p.Glu1852Asp	4.75
IV	7595255	A	T	missense_variant	MODERATE	tag-80	WBGene00018468	F45E4.3b	c.5556A>T	p.Glu1852Asp	4.75
V	6175377	C	G	synonymous_variant	LOW	ttn-1	WBGene00006436	W06H8.8g	c.21759G>C	p.Leu7253Leu	4.68
V	6175377	C	G	synonymous_variant	LOW	ttn-1	WBGene00006436	W06H8.8e.2	c.21759G>C	p.Leu7253Leu	4.68
V	6175377	C	G	synonymous_variant	LOW	ttn-1	WBGene00006436	W06H8.8f.2	c.21759G>C	p.Leu7253Leu	4.68
V	6175377	C	G	synonymous_variant	LOW	ttn-1	WBGene00006436	W06H8.8e.1	c.21759G>C	p.Leu7253Leu	4.68
V	6175377	C	G	synonymous_variant	LOW	ttn-1	WBGene00006436	W06H8.8f.1	c.21759G>C	p.Leu7253Leu	4.68
V	6175377	C	G	synonymous_variant	LOW	ttn-1	WBGene00006436	W06H8.8d	c.21699G>C	p.Leu7233Leu	4.68
X	15228426	C	A	missense_variant	MODERATE	H03A11.2	WBGene00010357	H03A11.2	c.1593G>T	p.Gln531His	4.68
I	10270997	C	T	synonymous_variant	LOW	ZC247.1	WBGene00013859	ZC247.1	c.6954G>A	p.Pro2318Pro	4.58
I	10271000	T	G	synonymous_variant	LOW	ZC247.1	WBGene00013859	ZC247.1	c.6951A>C	p.Gly2317Gly	4.58
IV	7598179	G	A	missense_variant	MODERATE	tag-80	WBGene00018468	F45E4.3a	c.8413G>A	p.Val2805Ile	4.51
IV	7598179	G	A	missense_variant	MODERATE	tag-80	WBGene00018468	F45E4.3b	c.8413G>A	p.Val2805Ile	4.51
I	10274276	T	A	synonymous_variant	LOW	ZC247.1	WBGene00013859	ZC247.1	c.3675A>T	p.Ser1225Ser	4.44
X	1553896	A	G	missense_variant	MODERATE	K06A9.1	WBGene00019435	K06A9.1b	c.4867A>G	p.Thr1623Ala	4.38
IV	7597400	A	G	missense_variant	MODERATE	tag-80	WBGene00018468	F45E4.3a	c.7634A>G	p.Gln2545Arg	4.36
IV	7597400	A	G	missense_variant	MODERATE	tag-80	WBGene00018468	F45E4.3b	c.7634A>G	p.Gln2545Arg	4.36
V	6171939	T	C	synonymous_variant	LOW	ttn-1	WBGene00006436	W06H8.8g	c.25197A>G	p.Lys8399Lys	4.35
V	6171939	T	C	synonymous_variant	LOW	ttn-1	WBGene00006436	W06H8.8e.2	c.25197A>G	p.Lys8399Lys	4.35
V	6171939	T	C	synonymous_variant	LOW	ttn-1	WBGene00006436	W06H8.8f.2	c.25197A>G	p.Lys8399Lys	4.35
V	6171939	T	C	synonymous_variant	LOW	ttn-1	WBGene00006436	W06H8.8e.1	c.25197A>G	p.Lys8399Lys	4.35
V	6171939	T	C	synonymous_variant	LOW	ttn-1	WBGene00006436	W06H8.8f.1	c.25197A>G	p.Lys8399Lys	4.35
V	6171939	T	C	synonymous_variant	LOW	ttn-1	WBGene00006436	W06H8.8d	c.25137A>G	p.Lys8379Lys	4.35
I	10275362	C	G	synonymous_variant	LOW	ZC247.1	WBGene00013859	ZC247.1	c.2589G>C	p.Ser863Ser	4.3
V	5080541	T	A	missense_variant	MODERATE	Y58A7A.3	WBGene00021977	Y58A7A.3	c.225A>T	p.Glu75Asp	4.25
V	5080552	C	T	missense_variant	MODERATE	Y58A7A.3	WBGene00021977	Y58A7A.3	c.214G>A	p.Asp72Asn	4.25
I	10273649	C	G	missense_variant	MODERATE	ZC247.1	WBGene00013859	ZC247.1	c.4302G>C	p.Met1434Ile	4.24
V	6180792	C	T	synonymous_variant	LOW	ttn-1	WBGene00006436	W06H8.8g	c.16344G>A	p.Lys5448Lys	4.19
V	6180792	C	T	synonymous_variant	LOW	ttn-1	WBGene00006436	W06H8.8e.2	c.16344G>A	p.Lys5448Lys	4.19
V	6180792	C	T	synonymous_variant	LOW	ttn-1	WBGene00006436	W06H8.8f.2	c.16344G>A	p.Lys5448Lys	4.19
V	6180792	C	T	synonymous_variant	LOW	ttn-1	WBGene00006436	W06H8.8e.1	c.16344G>A	p.Lys5448Lys	4.19
V	6180792	C	T	synonymous_variant	LOW	ttn-1	WBGene00006436	W06H8.8f.1	c.16344G>A	p.Lys5448Lys	4.19
V	6180792	C	T	synonymous_variant	LOW	ttn-1	WBGene00006436	W06H8.8d	c.16284G>A	p.Lys5428Lys	4.19
V	6180795	G	T	synonymous_variant	LOW	ttn-1	WBGene00006436	W06H8.8g	c.16341C>A	p.Ser5447Ser	4.19
V	6180795	G	T	synonymous_variant	LOW	ttn-1	WBGene00006436	W06H8.8e.2	c.16341C>A	p.Ser5447Ser	4.19
V	6180795	G	T	synonymous_variant	LOW	ttn-1	WBGene00006436	W06H8.8f.2	c.16341C>A	p.Ser5447Ser	4.19
V	6180795	G	T	synonymous_variant	LOW	ttn-1	WBGene00006436	W06H8.8e.1	c.16341C>A	p.Ser5447Ser	4.19
V	6180795	G	T	synonymous_variant	LOW	ttn-1	WBGene00006436	W06H8.8f.1	c.16341C>A	p.Ser5447Ser	4.19
V	6180795	G	T	synonymous_variant	LOW	ttn-1	WBGene00006436	W06H8.8d	c.16281C>A	p.Ser5427Ser	4.19
V	5080530	G	T	missense_variant	MODERATE	Y58A7A.3	WBGene00021977	Y58A7A.3	c.236C>A	p.Thr79Asn	4.02
V	5080533	A	G	missense_variant	MODERATE	Y58A7A.3	WBGene00021977	Y58A7A.3	c.233T>C	p.Leu78Ser	4.02
V	5080534	A	T	missense_variant	MODERATE	Y58A7A.3	WBGene00021977	Y58A7A.3	c.232T>A	p.Leu78Met	4.02
V	5080550	A	G	synonymous_variant	LOW	Y58A7A.3	WBGene00021977	Y58A7A.3	c.216T>C	p.Asp72Asp	4.02
I	10267210	G	T	missense_variant	MODERATE	ZC247.1	WBGene00013859	ZC247.1	c.10741C>A	p.Leu3581Met	3.96
V	6175400	G	T	missense_variant	MODERATE	ttn-1	WBGene00006436	W06H8.8g	c.21736C>A	p.Gln7246Lys	3.94
V	6175400	G	T	missense_variant	MODERATE	ttn-1	WBGene00006436	W06H8.8e.2	c.21736C>A	p.Gln7246Lys	3.94
V	6175400	G	T	missense_variant	MODERATE	ttn-1	WBGene00006436	W06H8.8f.2	c.21736C>A	p.Gln7246Lys	3.94
V	6175400	G	T	missense_variant	MODERATE	ttn-1	WBGene00006436	W06H8.8e.1	c.21736C>A	p.Gln7246Lys	3.94
V	6175400	G	T	missense_variant	MODERATE	ttn-1	WBGene00006436	W06H8.8f.1	c.21736C>A	p.Gln7246Lys	3.94
V	6175400	G	T	missense_variant	MODERATE	ttn-1	WBGene00006436	W06H8.8d	c.21676C>A	p.Gln7226Lys	3.94
V	6175784	G	T	missense_variant	MODERATE	ttn-1	WBGene00006436	W06H8.8g	c.21352C>A	p.Gln7118Lys	3.94
V	6175784	G	T	missense_variant	MODERATE	ttn-1	WBGene00006436	W06H8.8e.2	c.21352C>A	p.Gln7118Lys	3.94
V	6175784	G	T	missense_variant	MODERATE	ttn-1	WBGene00006436	W06H8.8f.2	c.21352C>A	p.Gln7118Lys	3.94
V	6175784	G	T	missense_variant	MODERATE	ttn-1	WBGene00006436	W06H8.8e.1	c.21352C>A	p.Gln7118Lys	3.94
V	6175784	G	T	missense_variant	MODERATE	ttn-1	WBGene00006436	W06H8.8f.1	c.21352C>A	p.Gln7118Lys	3.94
V	6175784	G	T	missense_variant	MODERATE	ttn-1	WBGene00006436	W06H8.8d	c.21292C>A	p.Gln7098Lys	3.94
II	11216020	A	G	synonymous_variant	LOW	srap-1	WBGene00011522	T06D8.1a	c.7848A>G	p.Glu2616Glu	3.91
II	11216020	A	G	synonymous_variant	LOW	srap-1	WBGene00011522	T06D8.1b	c.7848A>G	p.Glu2616Glu	3.91
II	11216020	A	G	synonymous_variant	LOW	srap-1	WBGene00011522	T06D8.1c	c.7236A>G	p.Glu2412Glu	3.91
I	10273808	A	T	synonymous_variant	LOW	ZC247.1	WBGene00013859	ZC247.1	c.4143T>A	p.Ser1381Ser	3.9
II	7367627	T	A	missense_variant	MODERATE	F43E2.6	WBGene00018394	F43E2.6a	c.158A>T	p.Asp53Val	3.9
II	7367627	T	A	missense_variant	MODERATE	F43E2.6	WBGene00018394	F43E2.6b.1	c.134A>T	p.Asp45Val	3.9
II	7367627	T	A	missense_variant	MODERATE	F43E2.6	WBGene00018394	F43E2.6b.2	c.134A>T	p.Asp45Val	3.9
IV	7594805	T	C	synonymous_variant	LOW	tag-80	WBGene00018468	F45E4.3a	c.5106T>C	p.Ser1702Ser	3.9
IV	7594805	T	C	synonymous_variant	LOW	tag-80	WBGene00018468	F45E4.3b	c.5106T>C	p.Ser1702Ser	3.9
IV	7592301	A	C	missense_variant	MODERATE	tag-80	WBGene00018468	F45E4.3a	c.2602A>C	p.Asn868His	3.84
IV	7592301	A	C	missense_variant	MODERATE	tag-80	WBGene00018468	F45E4.3b	c.2602A>C	p.Asn868His	3.84
V	5080547	T	A	synonymous_variant	LOW	Y58A7A.3	WBGene00021977	Y58A7A.3	c.219A>T	p.Arg73Arg	3.8
IV	7595518	T	G	missense_variant	MODERATE	tag-80	WBGene00018468	F45E4.3a	c.5819T>G	p.Ile1940Ser	3.41
IV	7595518	T	G	missense_variant	MODERATE	tag-80	WBGene00018468	F45E4.3b	c.5819T>G	p.Ile1940Ser	3.41
V	5080556	C	G	synonymous_variant	LOW	Y58A7A.3	WBGene00021977	Y58A7A.3	c.210G>C	p.Ala70Ala	3.39
X	3304556	C	T	synonymous_variant	LOW	F11D5.7	WBGene00043980	F11D5.7	c.126C>T	p.Asn42Asn	3.39
X	3304562	T	C	synonymous_variant	LOW	F11D5.7	WBGene00043980	F11D5.7	c.132T>C	p.Thr44Thr	3.39
X	3304565	A	G	synonymous_variant	LOW	F11D5.7	WBGene00043980	F11D5.7	c.135A>G	p.Leu45Leu	3.39
X	3304574	C	T	synonymous_variant	LOW	F11D5.7	WBGene00043980	F11D5.7	c.144C>T	p.His48His	3.39
V	6175386	A	G	synonymous_variant	LOW	ttn-1	WBGene00006436	W06H8.8g	c.21750T>C	p.Asp7250Asp	3.38
V	6175386	A	G	synonymous_variant	LOW	ttn-1	WBGene00006436	W06H8.8e.2	c.21750T>C	p.Asp7250Asp	3.38
V	6175386	A	G	synonymous_variant	LOW	ttn-1	WBGene00006436	W06H8.8f.2	c.21750T>C	p.Asp7250Asp	3.38
V	6175386	A	G	synonymous_variant	LOW	ttn-1	WBGene00006436	W06H8.8e.1	c.21750T>C	p.Asp7250Asp	3.38
V	6175386	A	G	synonymous_variant	LOW	ttn-1	WBGene00006436	W06H8.8f.1	c.21750T>C	p.Asp7250Asp	3.38
V	6175386	A	G	synonymous_variant	LOW	ttn-1	WBGene00006436	W06H8.8d	c.21690T>C	p.Asp7230Asp	3.38
V	6179422	G	A	missense_variant	MODERATE	ttn-1	WBGene00006436	W06H8.8g	c.17714C>T	p.Pro5905Leu	3.34
V	6179422	G	A	missense_variant	MODERATE	ttn-1	WBGene00006436	W06H8.8e.2	c.17714C>T	p.Pro5905Leu	3.34
V	6179422	G	A	missense_variant	MODERATE	ttn-1	WBGene00006436	W06H8.8f.2	c.17714C>T	p.Pro5905Leu	3.34
V	6179422	G	A	missense_variant	MODERATE	ttn-1	WBGene00006436	W06H8.8e.1	c.17714C>T	p.Pro5905Leu	3.34
V	6179422	G	A	missense_variant	MODERATE	ttn-1	WBGene00006436	W06H8.8f.1	c.17714C>T	p.Pro5905Leu	3.34
V	6179422	G	A	missense_variant	MODERATE	ttn-1	WBGene00006436	W06H8.8d	c.17654C>T	p.Pro5885Leu	3.34
I	10269790	C	T	missense_variant	MODERATE	ZC247.1	WBGene00013859	ZC247.1	c.8161G>A	p.Glu2721Lys	3.33
V	1642941	A	G	missense_variant	MODERATE	Y46H3D.1	WBGene00021608	Y46H3D.1	c.100A>G	p.Lys34Glu	3.3
I	10271200	A	G	synonymous_variant	LOW	ZC247.1	WBGene00013859	ZC247.1	c.6751T>C	p.Leu2251Leu	3.29
I	10275395	A	G	synonymous_variant	LOW	ZC247.1	WBGene00013859	ZC247.1	c.2556T>C	p.Tyr852Tyr	3.19
V	5080553	C	G	missense_variant	MODERATE	Y58A7A.3	WBGene00021977	Y58A7A.3	c.213G>C	p.Met71Ile	3.17
X	3304568	T	C	synonymous_variant	LOW	F11D5.7	WBGene00043980	F11D5.7	c.138T>C	p.Ser46Ser	3.17
X	3304570	C	A	missense_variant	MODERATE	F11D5.7	WBGene00043980	F11D5.7	c.140C>A	p.Thr47Asn	3.17
II	7367520	C	A	missense_variant	MODERATE	F43E2.6	WBGene00018394	F43E2.6a	c.265G>T	p.Asp89Tyr	3.11
II	7367520	C	A	missense_variant	MODERATE	F43E2.6	WBGene00018394	F43E2.6b.1	c.241G>T	p.Asp81Tyr	3.11
II	7367520	C	A	missense_variant	MODERATE	F43E2.6	WBGene00018394	F43E2.6b.2	c.241G>T	p.Asp81Tyr	3.11
I	10273814	T	A	synonymous_variant	LOW	ZC247.1	WBGene00013859	ZC247.1	c.4137A>T	p.Ser1379Ser	3.1
I	5163266	T	C	synonymous_variant	LOW	let-630	WBGene00002804	Y110A7A.19	c.1515A>G	p.Gln505Gln	3.02
I	10275194	A	T	synonymous_variant	LOW	ZC247.1	WBGene00013859	ZC247.1	c.2757T>A	p.Ser919Ser	2.97
V	5080559	A	T	missense_variant&splice_region_variant	MODERATE	Y58A7A.3	WBGene00021977	Y58A7A.3	c.207T>A	p.Asn69Lys	2.95
V	6179432	T	A	missense_variant	MODERATE	ttn-1	WBGene00006436	W06H8.8g	c.17704A>T	p.Thr5902Ser	2.95
V	6179432	T	A	missense_variant	MODERATE	ttn-1	WBGene00006436	W06H8.8e.2	c.17704A>T	p.Thr5902Ser	2.95
V	6179432	T	A	missense_variant	MODERATE	ttn-1	WBGene00006436	W06H8.8f.2	c.17704A>T	p.Thr5902Ser	2.95
V	6179432	T	A	missense_variant	MODERATE	ttn-1	WBGene00006436	W06H8.8e.1	c.17704A>T	p.Thr5902Ser	2.95
V	6179432	T	A	missense_variant	MODERATE	ttn-1	WBGene00006436	W06H8.8f.1	c.17704A>T	p.Thr5902Ser	2.95
V	6179432	T	A	missense_variant	MODERATE	ttn-1	WBGene00006436	W06H8.8d	c.17644A>T	p.Thr5882Ser	2.95
V	6182826	T	C	synonymous_variant	LOW	ttn-1	WBGene00006436	W06H8.8g	c.14310A>G	p.Lys4770Lys	2.86
V	6182826	T	C	synonymous_variant	LOW	ttn-1	WBGene00006436	W06H8.8e.2	c.14310A>G	p.Lys4770Lys	2.86
V	6182826	T	C	synonymous_variant	LOW	ttn-1	WBGene00006436	W06H8.8f.2	c.14310A>G	p.Lys4770Lys	2.86
V	6182826	T	C	synonymous_variant	LOW	ttn-1	WBGene00006436	W06H8.8e.1	c.14310A>G	p.Lys4770Lys	2.86
V	6182826	T	C	synonymous_variant	LOW	ttn-1	WBGene00006436	W06H8.8f.1	c.14310A>G	p.Lys4770Lys	2.86
V	6182826	T	C	synonymous_variant	LOW	ttn-1	WBGene00006436	W06H8.8d	c.14310A>G	p.Lys4770Lys	2.86
I	10275425	A	T	synonymous_variant	LOW	ZC247.1	WBGene00013859	ZC247.1	c.2526T>A	p.Ser842Ser	2.85
IV	15931400	T	A	stop_lost	HIGH	Y105C5B.t4	WBGene00014611	Y105C5B.t4	c.14A>T	p.Ter5Leuext*?	2.79
I	10275212	C	A	missense_variant	MODERATE	ZC247.1	WBGene00013859	ZC247.1	c.2739G>T	p.Leu913Phe	2.78
V	6177108	T	C	synonymous_variant	LOW	ttn-1	WBGene00006436	W06H8.8g	c.20028A>G	p.Lys6676Lys	2.75
V	6177108	T	C	synonymous_variant	LOW	ttn-1	WBGene00006436	W06H8.8e.2	c.20028A>G	p.Lys6676Lys	2.75
V	6177108	T	C	synonymous_variant	LOW	ttn-1	WBGene00006436	W06H8.8f.2	c.20028A>G	p.Lys6676Lys	2.75
V	6177108	T	C	synonymous_variant	LOW	ttn-1	WBGene00006436	W06H8.8e.1	c.20028A>G	p.Lys6676Lys	2.75
V	6177108	T	C	synonymous_variant	LOW	ttn-1	WBGene00006436	W06H8.8f.1	c.20028A>G	p.Lys6676Lys	2.75
V	6177108	T	C	synonymous_variant	LOW	ttn-1	WBGene00006436	W06H8.8d	c.19968A>G	p.Lys6656Lys	2.75
X	3304541	A	G	missense_variant	MODERATE	F11D5.7	WBGene00043980	F11D5.7	c.111A>G	p.Ile37Met	2.75
X	3304547	G	A	synonymous_variant	LOW	F11D5.7	WBGene00043980	F11D5.7	c.117G>A	p.Glu39Glu	2.75
I	10269338	T	A	synonymous_variant	LOW	ZC247.1	WBGene00013859	ZC247.1	c.8613A>T	p.Pro2871Pro	2.73
I	10275180	G	C	missense_variant	MODERATE	ZC247.1	WBGene00013859	ZC247.1	c.2771C>G	p.Pro924Arg	2.73
IV	16780557	C	T	missense_variant	MODERATE	Y43D4A.5	WBGene00012791	Y43D4A.5a	c.3860C>T	p.Ser1287Leu	2.73
IV	16780557	C	T	missense_variant	MODERATE	Y43D4A.5	WBGene00012791	Y43D4A.5b	c.1094C>T	p.Ser365Leu	2.73
IV	16780557	C	T	missense_variant	MODERATE	Y43D4A.5	WBGene00012791	Y43D4A.5c	c.3860C>T	p.Ser1287Leu	2.73
IV	16780557	C	T	missense_variant	MODERATE	Y43D4A.5	WBGene00012791	Y43D4A.5d	c.1094C>T	p.Ser365Leu	2.73
IV	16780558	A	C	synonymous_variant	LOW	Y43D4A.5	WBGene00012791	Y43D4A.5a	c.3861A>C	p.Ser1287Ser	2.73
IV	16780558	A	C	synonymous_variant	LOW	Y43D4A.5	WBGene00012791	Y43D4A.5b	c.1095A>C	p.Ser365Ser	2.73
IV	16780558	A	C	synonymous_variant	LOW	Y43D4A.5	WBGene00012791	Y43D4A.5c	c.3861A>C	p.Ser1287Ser	2.73
IV	16780558	A	C	synonymous_variant	LOW	Y43D4A.5	WBGene00012791	Y43D4A.5d	c.1095A>C	p.Ser365Ser	2.73
I	618828	A	G	missense_variant	MODERATE	sago-2	WBGene00018921	F56A6.1a	c.521A>G	p.Lys174Arg	2.69
I	618828	A	G	missense_variant	MODERATE	sago-2	WBGene00018921	F56A6.1b	c.521A>G	p.Lys174Arg	2.69
V	6182874	T	C	synonymous_variant	LOW	ttn-1	WBGene00006436	W06H8.8g	c.14262A>G	p.Ala4754Ala	2.67
V	6182874	T	C	synonymous_variant	LOW	ttn-1	WBGene00006436	W06H8.8e.2	c.14262A>G	p.Ala4754Ala	2.67
V	6182874	T	C	synonymous_variant	LOW	ttn-1	WBGene00006436	W06H8.8f.2	c.14262A>G	p.Ala4754Ala	2.67
V	6182874	T	C	synonymous_variant	LOW	ttn-1	WBGene00006436	W06H8.8e.1	c.14262A>G	p.Ala4754Ala	2.67
V	6182874	T	C	synonymous_variant	LOW	ttn-1	WBGene00006436	W06H8.8f.1	c.14262A>G	p.Ala4754Ala	2.67
V	6182874	T	C	synonymous_variant	LOW	ttn-1	WBGene00006436	W06H8.8d	c.14262A>G	p.Ala4754Ala	2.67
IV	7599106	T	A	missense_variant	MODERATE	tag-80	WBGene00018468	F45E4.3a	c.9336T>A	p.Asp3112Glu	2.59
IV	7599106	T	A	missense_variant	MODERATE	tag-80	WBGene00018468	F45E4.3b	c.9336T>A	p.Asp3112Glu	2.59
I	10275200	T	A	synonymous_variant	LOW	ZC247.1	WBGene00013859	ZC247.1	c.2751A>T	p.Ser917Ser	2.54
I	10270363	A	T	missense_variant	MODERATE	ZC247.1	WBGene00013859	ZC247.1	c.7588T>A	p.Leu2530Met	2.53
I	5163128	T	G	synonymous_variant	LOW	let-630	WBGene00002804	Y110A7A.19	c.1605A>C	p.Thr535Thr	2.5
II	12606917	C	G	missense_variant	MODERATE	lips-15	WBGene00012585	Y38E10A.7	c.787C>G	p.Pro263Ala	2.44
V	6178681	G	T	missense_variant	MODERATE	ttn-1	WBGene00006436	W06H8.8g	c.18455C>A	p.Thr6152Lys	2.41
V	6178681	G	T	missense_variant	MODERATE	ttn-1	WBGene00006436	W06H8.8e.2	c.18455C>A	p.Thr6152Lys	2.41
V	6178681	G	T	missense_variant	MODERATE	ttn-1	WBGene00006436	W06H8.8f.2	c.18455C>A	p.Thr6152Lys	2.41
V	6178681	G	T	missense_variant	MODERATE	ttn-1	WBGene00006436	W06H8.8e.1	c.18455C>A	p.Thr6152Lys	2.41
V	6178681	G	T	missense_variant	MODERATE	ttn-1	WBGene00006436	W06H8.8f.1	c.18455C>A	p.Thr6152Lys	2.41
V	6178681	G	T	missense_variant	MODERATE	ttn-1	WBGene00006436	W06H8.8d	c.18395C>A	p.Thr6132Lys	2.41
V	1642949	T	C	synonymous_variant	LOW	Y46H3D.1	WBGene00021608	Y46H3D.1	c.108T>C	p.Ala36Ala	2.39
I	10266681	A	G	missense_variant	MODERATE	ZC247.1	WBGene00013859	ZC247.1	c.11270T>C	p.Leu3757Ser	2.35
I	5162849	G	A	missense_variant	MODERATE	let-630	WBGene00002804	Y110A7A.19	c.1832C>T	p.Thr611Ile	2.26
V	6178686	T	C	synonymous_variant	LOW	ttn-1	WBGene00006436	W06H8.8g	c.18450A>G	p.Lys6150Lys	2.2
V	6178686	T	C	synonymous_variant	LOW	ttn-1	WBGene00006436	W06H8.8e.2	c.18450A>G	p.Lys6150Lys	2.2
V	6178686	T	C	synonymous_variant	LOW	ttn-1	WBGene00006436	W06H8.8f.2	c.18450A>G	p.Lys6150Lys	2.2
V	6178686	T	C	synonymous_variant	LOW	ttn-1	WBGene00006436	W06H8.8e.1	c.18450A>G	p.Lys6150Lys	2.2
V	6178686	T	C	synonymous_variant	LOW	ttn-1	WBGene00006436	W06H8.8f.1	c.18450A>G	p.Lys6150Lys	2.2
V	6178686	T	C	synonymous_variant	LOW	ttn-1	WBGene00006436	W06H8.8d	c.18390A>G	p.Lys6130Lys	2.2
IV	11145050	T	A	missense_variant	MODERATE	F01G4.4	WBGene00008503	F01G4.4b	c.1508T>A	p.Phe503Tyr	2.18
IV	11145050	T	A	missense_variant	MODERATE	F01G4.4	WBGene00008503	F01G4.4a	c.1508T>A	p.Phe503Tyr	2.18
IV	7591424	A	G	synonymous_variant	LOW	tag-80	WBGene00018468	F45E4.3a	c.1725A>G	p.Lys575Lys	2.15
IV	7591424	A	G	synonymous_variant	LOW	tag-80	WBGene00018468	F45E4.3b	c.1725A>G	p.Lys575Lys	2.15
IV	7592549	T	C	synonymous_variant	LOW	tag-80	WBGene00018468	F45E4.3a	c.2850T>C	p.Ser950Ser	2.12
IV	7592549	T	C	synonymous_variant	LOW	tag-80	WBGene00018468	F45E4.3b	c.2850T>C	p.Ser950Ser	2.12
I	12027257	G	A	missense_variant	MODERATE	Y53C10A.10	WBGene00013138	Y53C10A.10	c.3731G>A	p.Arg1244Lys	2.11
IV	16780628	C	G	missense_variant	MODERATE	Y43D4A.5	WBGene00012791	Y43D4A.5a	c.3931C>G	p.Gln1311Glu	2.11
IV	16780628	C	G	missense_variant	MODERATE	Y43D4A.5	WBGene00012791	Y43D4A.5b	c.1165C>G	p.Gln389Glu	2.11
IV	16780628	C	G	missense_variant	MODERATE	Y43D4A.5	WBGene00012791	Y43D4A.5c	c.3931C>G	p.Gln1311Glu	2.11
IV	16780628	C	G	missense_variant	MODERATE	Y43D4A.5	WBGene00012791	Y43D4A.5d	c.1165C>G	p.Gln389Glu	2.11
IV	16780636	C	T	synonymous_variant	LOW	Y43D4A.5	WBGene00012791	Y43D4A.5a	c.3939C>T	p.Ile1313Ile	2.11
IV	16780636	C	T	synonymous_variant	LOW	Y43D4A.5	WBGene00012791	Y43D4A.5b	c.1173C>T	p.Ile391Ile	2.11
IV	16780636	C	T	synonymous_variant	LOW	Y43D4A.5	WBGene00012791	Y43D4A.5c	c.3939C>T	p.Ile1313Ile	2.11
IV	16780636	C	T	synonymous_variant	LOW	Y43D4A.5	WBGene00012791	Y43D4A.5d	c.1173C>T	p.Ile391Ile	2.11
I	10271228	T	C	synonymous_variant	LOW	ZC247.1	WBGene00013859	ZC247.1	c.6723A>G	p.Pro2241Pro	2.06
II	7367499	G	T	missense_variant	MODERATE	F43E2.6	WBGene00018394	F43E2.6a	c.286C>A	p.Leu96Ile	2.04
II	7367499	G	T	missense_variant	MODERATE	F43E2.6	WBGene00018394	F43E2.6b.1	c.262C>A	p.Leu88Ile	2.04
II	7367499	G	T	missense_variant	MODERATE	F43E2.6	WBGene00018394	F43E2.6b.2	c.262C>A	p.Leu88Ile	2.04
IV	15130530	T	C	synonymous_variant	LOW	col-135	WBGene00000708	M199.5a	c.1212A>G	p.Pro404Pro	1.95
I	10274853	G	T	missense_variant	MODERATE	ZC247.1	WBGene00013859	ZC247.1	c.3098C>A	p.Thr1033Asn	1.91
IV	16780617	A	C	missense_variant	MODERATE	Y43D4A.5	WBGene00012791	Y43D4A.5a	c.3920A>C	p.Asp1307Ala	1.91
IV	16780617	A	C	missense_variant	MODERATE	Y43D4A.5	WBGene00012791	Y43D4A.5b	c.1154A>C	p.Asp385Ala	1.91
IV	16780617	A	C	missense_variant	MODERATE	Y43D4A.5	WBGene00012791	Y43D4A.5c	c.3920A>C	p.Asp1307Ala	1.91
IV	16780617	A	C	missense_variant	MODERATE	Y43D4A.5	WBGene00012791	Y43D4A.5d	c.1154A>C	p.Asp385Ala	1.91
IV	16780629	A	G	missense_variant	MODERATE	Y43D4A.5	WBGene00012791	Y43D4A.5a	c.3932A>G	p.Gln1311Arg	1.91
IV	16780629	A	G	missense_variant	MODERATE	Y43D4A.5	WBGene00012791	Y43D4A.5b	c.1166A>G	p.Gln389Arg	1.91
IV	16780629	A	G	missense_variant	MODERATE	Y43D4A.5	WBGene00012791	Y43D4A.5c	c.3932A>G	p.Gln1311Arg	1.91
IV	16780629	A	G	missense_variant	MODERATE	Y43D4A.5	WBGene00012791	Y43D4A.5d	c.1166A>G	p.Gln389Arg	1.91
I	10271186	T	A	synonymous_variant	LOW	ZC247.1	WBGene00013859	ZC247.1	c.6765A>T	p.Pro2255Pro	1.8
IV	16780546	C	T	synonymous_variant	LOW	Y43D4A.5	WBGene00012791	Y43D4A.5a	c.3849C>T	p.His1283His	1.78
IV	16780546	C	T	synonymous_variant	LOW	Y43D4A.5	WBGene00012791	Y43D4A.5b	c.1083C>T	p.His361His	1.78
IV	16780546	C	T	synonymous_variant	LOW	Y43D4A.5	WBGene00012791	Y43D4A.5c	c.3849C>T	p.His1283His	1.78
IV	16780546	C	T	synonymous_variant	LOW	Y43D4A.5	WBGene00012791	Y43D4A.5d	c.1083C>T	p.His361His	1.78
V	6178701	T	A	synonymous_variant	LOW	ttn-1	WBGene00006436	W06H8.8g	c.18435A>T	p.Ala6145Ala	1.76
V	6178701	T	A	synonymous_variant	LOW	ttn-1	WBGene00006436	W06H8.8e.2	c.18435A>T	p.Ala6145Ala	1.76
V	6178701	T	A	synonymous_variant	LOW	ttn-1	WBGene00006436	W06H8.8f.2	c.18435A>T	p.Ala6145Ala	1.76
V	6178701	T	A	synonymous_variant	LOW	ttn-1	WBGene00006436	W06H8.8e.1	c.18435A>T	p.Ala6145Ala	1.76
V	6178701	T	A	synonymous_variant	LOW	ttn-1	WBGene00006436	W06H8.8f.1	c.18435A>T	p.Ala6145Ala	1.76
V	6178701	T	A	synonymous_variant	LOW	ttn-1	WBGene00006436	W06H8.8d	c.18375A>T	p.Ala6125Ala	1.76
V	6181508	G	C	missense_variant	MODERATE	ttn-1	WBGene00006436	W06H8.8g	c.15628C>G	p.Gln5210Glu	1.72
V	6181508	G	C	missense_variant	MODERATE	ttn-1	WBGene00006436	W06H8.8e.2	c.15628C>G	p.Gln5210Glu	1.72
V	6181508	G	C	missense_variant	MODERATE	ttn-1	WBGene00006436	W06H8.8f.2	c.15628C>G	p.Gln5210Glu	1.72
V	6181508	G	C	missense_variant	MODERATE	ttn-1	WBGene00006436	W06H8.8e.1	c.15628C>G	p.Gln5210Glu	1.72
V	6181508	G	C	missense_variant	MODERATE	ttn-1	WBGene00006436	W06H8.8f.1	c.15628C>G	p.Gln5210Glu	1.72
V	6181508	G	C	missense_variant	MODERATE	ttn-1	WBGene00006436	W06H8.8d	c.15628C>G	p.Gln5210Glu	1.72
I	10270464	G	T	missense_variant	MODERATE	ZC247.1	WBGene00013859	ZC247.1	c.7487C>A	p.Thr2496Asn	1.7
I	10268689	G	A	missense_variant	MODERATE	ZC247.1	WBGene00013859	ZC247.1	c.9262C>T	p.Pro3088Ser	1.62
IV	7591939	A	G	missense_variant	MODERATE	tag-80	WBGene00018468	F45E4.3a	c.2240A>G	p.Lys747Arg	1.56
IV	7591939	A	G	missense_variant	MODERATE	tag-80	WBGene00018468	F45E4.3b	c.2240A>G	p.Lys747Arg	1.56
IV	7598801	T	G	missense_variant	MODERATE	tag-80	WBGene00018468	F45E4.3a	c.9035T>G	p.Ile3012Ser	1.56
IV	7598801	T	G	missense_variant	MODERATE	tag-80	WBGene00018468	F45E4.3b	c.9035T>G	p.Ile3012Ser	1.56
I	237805	T	G	missense_variant	MODERATE	Y48G1BM.6	WBGene00021671	Y48G1BM.6	c.242A>C	p.Asn81Thr	1.54
IV	7595243	A	G	synonymous_variant	LOW	tag-80	WBGene00018468	F45E4.3a	c.5544A>G	p.Glu1848Glu	1.49
IV	7595243	A	G	synonymous_variant	LOW	tag-80	WBGene00018468	F45E4.3b	c.5544A>G	p.Glu1848Glu	1.49
IV	7598784	T	A	synonymous_variant	LOW	tag-80	WBGene00018468	F45E4.3a	c.9018T>A	p.Val3006Val	1.48
IV	7598784	T	A	synonymous_variant	LOW	tag-80	WBGene00018468	F45E4.3b	c.9018T>A	p.Val3006Val	1.48
IV	7592400	G	A	missense_variant	MODERATE	tag-80	WBGene00018468	F45E4.3a	c.2701G>A	p.Asp901Asn	1.4
IV	7592400	G	A	missense_variant	MODERATE	tag-80	WBGene00018468	F45E4.3b	c.2701G>A	p.Asp901Asn	1.4
IV	15130545	C	T	synonymous_variant	LOW	col-135	WBGene00000708	M199.5a	c.1197G>A	p.Lys399Lys	1.4
I	10270362	A	C	missense_variant	MODERATE	ZC247.1	WBGene00013859	ZC247.1	c.7589T>G	p.Leu2530Trp	1.39
I	618563	C	G	missense_variant	MODERATE	sago-2	WBGene00018921	F56A6.1a	c.300C>G	p.Asn100Lys	1.27
I	618563	C	G	missense_variant	MODERATE	sago-2	WBGene00018921	F56A6.1b	c.300C>G	p.Asn100Lys	1.27
III	9101544	C	A	synonymous_variant	LOW	ZK507.3	WBGene00013979	ZK507.3	c.129C>A	p.Ile43Ile	1.25
III	9101547	G	A	synonymous_variant	LOW	ZK507.3	WBGene00013979	ZK507.3	c.132G>A	p.Lys44Lys	1.25
X	3304526	C	T	synonymous_variant	LOW	F11D5.7	WBGene00043980	F11D5.7	c.96C>T	p.Val32Val	1.24
IV	11145054	G	A	synonymous_variant	LOW	F01G4.4	WBGene00008503	F01G4.4b	c.1512G>A	p.Ala504Ala	1.21
IV	11145054	G	A	synonymous_variant	LOW	F01G4.4	WBGene00008503	F01G4.4a	c.1512G>A	p.Ala504Ala	1.21
IV	7595501	T	A	synonymous_variant	LOW	tag-80	WBGene00018468	F45E4.3a	c.5802T>A	p.Val1934Val	1.19
IV	7595501	T	A	synonymous_variant	LOW	tag-80	WBGene00018468	F45E4.3b	c.5802T>A	p.Val1934Val	1.19
III	10907844	C	T	synonymous_variant	LOW	unc-119	WBGene00006843	M142.1c	c.312C>T	p.Asp104Asp	1.12
III	10907844	C	T	synonymous_variant	LOW	unc-119	WBGene00006843	M142.1a	c.237C>T	p.Asp79Asp	1.12
III	10907844	C	T	synonymous_variant	LOW	unc-119	WBGene00006843	M142.1b	c.177C>T	p.Asp59Asp	1.12
III	10907853	G	T	synonymous_variant	LOW	unc-119	WBGene00006843	M142.1c	c.321G>T	p.Thr107Thr	1.12
III	10907853	G	T	synonymous_variant	LOW	unc-119	WBGene00006843	M142.1a	c.246G>T	p.Thr82Thr	1.12
III	10907853	G	T	synonymous_variant	LOW	unc-119	WBGene00006843	M142.1b	c.186G>T	p.Thr62Thr	1.12
IV	15130557	A	G	synonymous_variant	LOW	col-135	WBGene00000708	M199.5a	c.1185T>C	p.Asp395Asp	1.12
IV	7591406	A	T	missense_variant	MODERATE	tag-80	WBGene00018468	F45E4.3a	c.1707A>T	p.Glu569Asp	1.01
IV	7591406	A	T	missense_variant	MODERATE	tag-80	WBGene00018468	F45E4.3b	c.1707A>T	p.Glu569Asp	1.01
V	6178704	A	T	synonymous_variant	LOW	ttn-1	WBGene00006436	W06H8.8g	c.18432T>A	p.Leu6144Leu	1.01
V	6178704	A	T	synonymous_variant	LOW	ttn-1	WBGene00006436	W06H8.8e.2	c.18432T>A	p.Leu6144Leu	1.01
V	6178704	A	T	synonymous_variant	LOW	ttn-1	WBGene00006436	W06H8.8f.2	c.18432T>A	p.Leu6144Leu	1.01
V	6178704	A	T	synonymous_variant	LOW	ttn-1	WBGene00006436	W06H8.8e.1	c.18432T>A	p.Leu6144Leu	1.01
V	6178704	A	T	synonymous_variant	LOW	ttn-1	WBGene00006436	W06H8.8f.1	c.18432T>A	p.Leu6144Leu	1.01
V	6178704	A	T	synonymous_variant	LOW	ttn-1	WBGene00006436	W06H8.8d	c.18372T>A	p.Leu6124Leu	1.01
III	10907847	C	G	synonymous_variant	LOW	unc-119	WBGene00006843	M142.1c	c.315C>G	p.Leu105Leu	0.99
III	10907847	C	G	synonymous_variant	LOW	unc-119	WBGene00006843	M142.1a	c.240C>G	p.Leu80Leu	0.99
III	10907847	C	G	synonymous_variant	LOW	unc-119	WBGene00006843	M142.1b	c.180C>G	p.Leu60Leu	0.99
IV	16780527	C	A	missense_variant	MODERATE	Y43D4A.5	WBGene00012791	Y43D4A.5a	c.3830C>A	p.Ser1277Tyr	0.88
IV	16780527	C	A	missense_variant	MODERATE	Y43D4A.5	WBGene00012791	Y43D4A.5b	c.1064C>A	p.Ser355Tyr	0.88
IV	16780527	C	A	missense_variant	MODERATE	Y43D4A.5	WBGene00012791	Y43D4A.5c	c.3830C>A	p.Ser1277Tyr	0.88
IV	16780527	C	A	missense_variant	MODERATE	Y43D4A.5	WBGene00012791	Y43D4A.5d	c.1064C>A	p.Ser355Tyr	0.88

## Sheet: 5. CFJ42 - indels
Chr	Positions	Ref	Alt	Type	Impact	Gene	WBGene	Transcript	Change	AA change	quality by depth (~12 = hetrozygous, ~30 = homozygous)
IV	13511655	ACAT	A	disruptive_inframe_deletion	MODERATE	puf-3	WBGene00004239	Y45F10A.2	c.416_418delATG	p.Asp139del	36.48
V	2227204	TGCCCGCACC	T	conservative_inframe_deletion	MODERATE	nhr-18	WBGene00003617	F44C8.3	c.4_12delCCCGCACCG	p.Pro2_Pro4del	35.22
II	7698954	C	CG	frameshift_variant	HIGH	moa-2	WBGene00015205	B0495.6	c.79dupC	p.Arg27fs	35.2
V	12167424	C	CCCTGGTGGTCCTGGTGGTCCGGCTGGGCATGTGATGCAAGCAGAAGCAGATGAGTGTTGTTCAGCAACTCCAGCTCCTCCAGCTTGTCCATCACCTCCTGGTTCTCCTGCCTCTCCTGGAGCACCATCCTCT	disruptive_inframe_insertion	MODERATE	col-37	WBGene00000614	ZK863.2	c.329_330insAGAGGATGGTGCTCCAGGAGAGGCAGGAGAACCAGGAGGTGATGGACAAGCTGGAGGAGCTGGAGTTGCTGAACAACACTCATCTGCTTCTGCTTGCATCACATGCCCAGCCGGACCACCAGGACCACCAGG	p.Gly110_Pro111insGluAspGlyAlaProGlyGluAlaGlyGluProGlyGlyAspGlyGlnAlaGlyGlyAlaGlyValAlaGluGlnHisSerSerAlaSerAlaCysIleThrCysProAlaGlyProProGlyProProGly	34.83
II	7124047	C	CG	frameshift_variant	HIGH	F10E7.2	WBGene00017344	F10E7.2	c.386dupG	p.Thr130fs	34.68
II	6737105	TC	T	splice_region_variant&intron_variant	LOW	T14B4.1	WBGene00020498	T14B4.1	c.96-5delC		34.11
II	5078789	G	GC	frameshift_variant	HIGH	dsh-2	WBGene00001102	C27A2.6	c.1972dupG	p.Ala658fs	33.74
III	10498230	G	GC	frameshift_variant	HIGH	F43D9.1	WBGene00009653	F43D9.1	c.3096_3097insC	p.Cys1033fs	33.61
I	12299416	G	GAATTGATCTACTGAAACCAAGAGAAT	frameshift_variant&stop_gained	HIGH	F56H6.7	WBGene00010168	F56H6.7	c.1316_1317insGATCTACTGAAACCAAGAGAATAATT	p.Phe439fs	33.45
V	13647362	C	CATCCCGATCCCGATCCAGCCCGATCCCGATCCATCCCGATCCCGATCCATCCCGATCCATCCCGATCCCGATCCATCCCGATCCCGATCCCGATCCCG	frameshift_variant	HIGH	H37A05.4	WBGene00044200	H37A05.4a	c.527_528insCGGGATCGGGATCGGGATCGGGATGGATCGGGATCGGGATGGATCGGGATGGATCGGGATCGGGATGGATCGGGATCGGGCTGGATCGGGATCGGGAT	p.Met176fs	33.4
V	13647362	C	CATCCCGATCCCGATCCAGCCCGATCCCGATCCATCCCGATCCCGATCCATCCCGATCCATCCCGATCCCGATCCATCCCGATCCCGATCCCGATCCCG	frameshift_variant	HIGH	H37A05.4	WBGene00044200	H37A05.4b	c.527_528insCGGGATCGGGATCGGGATCGGGATGGATCGGGATCGGGATGGATCGGGATGGATCGGGATCGGGATGGATCGGGATCGGGCTGGATCGGGATCGGGAT	p.Met176fs	33.4
III	5762085	G	GC	frameshift_variant	HIGH	B0244.t3	WBGene00022899	B0244.t3	c.41dupG	p.Gly15fs	33.23
X	8639290	A	ACG	frameshift_variant	HIGH	F12D9.t5	WBGene00022990	F12D9.t5	c.4_5dupCG	p.Gly3fs	33.22
IV	7053286	AC	A	frameshift_variant	HIGH	nhr-105	WBGene00003695	C06G3.1a.1	c.1214delC	p.Pro405fs	33.12
IV	7053286	AC	A	frameshift_variant	HIGH	nhr-105	WBGene00003695	C06G3.1a.2	c.1214delC	p.Pro405fs	33.12
IV	7053286	AC	A	frameshift_variant	HIGH	nhr-105	WBGene00003695	C06G3.1b.2	c.1166delC	p.Pro389fs	33.12
IV	7053286	AC	A	frameshift_variant	HIGH	nhr-105	WBGene00003695	C06G3.1b.1	c.1166delC	p.Pro389fs	33.12
II	7028486	T	TA	splice_region_variant&intron_variant	LOW	C52E12.1	WBGene00016888	C52E12.1	c.2141+2_2141+3insA		33.08
III	5953950	A	AG	frameshift_variant	HIGH	nono-1	WBGene00017778	F25B5.7a	c.1511dupC	p.His505fs	32.48
III	5953950	A	AG	frameshift_variant	HIGH	nono-1	WBGene00017778	F25B5.7c	c.671dupC	p.His225fs	32.48
X	1417333	A	AAACTCTTTTCCTTTCCTCAGTCACCGCGTTGGGGGGTTTTTCGAAGGTACCTCTAACTTGGTGACTGAGGAAAGGAAAAGAGTTTTTG	frameshift_variant	HIGH	F19G12.4	WBGene00017612	F19G12.4	c.40_41insCTTTCCTCAGTCACCGCGTTGGGGGGTTTTTCGAAGGTACCTCTAACTTGGTGACTGAGGAAAGGAAAAGAGTTTTTGAACTCTTTTC	p.Leu14fs	32.45
III	4429019	A	AC	frameshift_variant	HIGH	C28A5.t3	WBGene00014269	C28A5.t3	c.5dupG	p.Ile3fs	32.13
V	10394037	ATCCAT	A	frameshift_variant	HIGH	col-151	WBGene00000724	AC3.6	c.523_527delATGGA	p.Met175fs	32.01
II	7697471	TC	T	frameshift_variant	HIGH	B0495.5	WBGene00015204	B0495.5.1	c.821delG	p.Gly274fs	32
II	7697471	TC	T	frameshift_variant	HIGH	B0495.5	WBGene00015204	B0495.5.2	c.821delG	p.Gly274fs	32
IV	15476881	C	CAGA	splice_acceptor_variant&intron_variant	HIGH	Y73F8A.26	WBGene00013531	Y73F8A.26a	c.1258-3_1258-2insAGA		31.94
IV	15476881	C	CAGA	splice_acceptor_variant&intron_variant	HIGH	Y73F8A.26	WBGene00013531	Y73F8A.26b	c.955-3_955-2insAGA		31.94
I	6066247	T	TGATCTCCAATTACAATCAAAA	conservative_inframe_insertion	MODERATE	C27A12.9	WBGene00016159	C27A12.9	c.769_770insTTTTGATTGTAATTGGAGATC	p.Asp256_His257insLeuLeuIleValIleGlyAsp	31.93
II	6736533	G	GC	frameshift_variant	HIGH	T14B4.2	WBGene00020499	T14B4.2	c.279_280insC	p.Asn94fs	31.8
II	6759299	TC	T	frameshift_variant	HIGH	F41G3.2	WBGene00018299	F41G3.2	c.14delC	p.Pro5fs	31.63
V	6177106	T	TC	frameshift_variant	HIGH	ttn-1	WBGene00006436	W06H8.8g	c.20029dupG	p.Asp6677fs	31.6
V	6177106	T	TC	frameshift_variant	HIGH	ttn-1	WBGene00006436	W06H8.8e.2	c.20029dupG	p.Asp6677fs	31.6
V	6177106	T	TC	frameshift_variant	HIGH	ttn-1	WBGene00006436	W06H8.8f.2	c.20029dupG	p.Asp6677fs	31.6
V	6177106	T	TC	frameshift_variant	HIGH	ttn-1	WBGene00006436	W06H8.8e.1	c.20029dupG	p.Asp6677fs	31.6
V	6177106	T	TC	frameshift_variant	HIGH	ttn-1	WBGene00006436	W06H8.8f.1	c.20029dupG	p.Asp6677fs	31.6
V	6177106	T	TC	frameshift_variant	HIGH	ttn-1	WBGene00006436	W06H8.8d	c.19969dupG	p.Asp6657fs	31.6
III	9348875	A	AG	splice_region_variant&intron_variant	LOW	K04H4.2	WBGene00010573	K04H4.2c.1	c.3986-8_3986-7insC		31.54
III	9348875	A	AG	splice_region_variant&intron_variant	LOW	K04H4.2	WBGene00010573	K04H4.2b.1	c.1961-8_1961-7insC		31.54
III	9348875	A	AG	splice_region_variant&intron_variant	LOW	K04H4.2	WBGene00010573	K04H4.2b.3	c.1961-8_1961-7insC		31.54
III	9348875	A	AG	splice_region_variant&intron_variant	LOW	K04H4.2	WBGene00010573	K04H4.2c.3	c.3986-8_3986-7insC		31.54
III	9348875	A	AG	splice_region_variant&intron_variant	LOW	K04H4.2	WBGene00010573	K04H4.2b.2	c.1961-8_1961-7insC		31.54
III	9348875	A	AG	splice_region_variant&intron_variant	LOW	K04H4.2	WBGene00010573	K04H4.2c.2	c.3986-8_3986-7insC		31.54
X	1615139	TC	T	frameshift_variant	HIGH	H11E01.3	WBGene00019188	H11E01.3	c.2119delC	p.His707fs	31.37
V	12166948	G	GC	splice_region_variant&intron_variant	LOW	col-37	WBGene00000614	ZK863.2	c.802+3_802+4insG		31.33
IV	13203448	GA	G	splice_region_variant&intron_variant	LOW	ced-3	WBGene00000417	C48D1.2a	c.282-5delT		31.18
IV	7053292	C	CT	frameshift_variant	HIGH	nhr-105	WBGene00003695	C06G3.1a.1	c.1218dupT	p.Arg407fs	31.04
IV	7053292	C	CT	frameshift_variant	HIGH	nhr-105	WBGene00003695	C06G3.1a.2	c.1218dupT	p.Arg407fs	31.04
IV	7053292	C	CT	frameshift_variant	HIGH	nhr-105	WBGene00003695	C06G3.1b.2	c.1170dupT	p.Arg391fs	31.04
IV	7053292	C	CT	frameshift_variant	HIGH	nhr-105	WBGene00003695	C06G3.1b.1	c.1170dupT	p.Arg391fs	31.04
III	9102246	TC	T	frameshift_variant	HIGH	ZK507.3	WBGene00013979	ZK507.3	c.567delC	p.Glu190fs	31.02
V	5084639	G	GAA	frameshift_variant	HIGH	Y58A7A.4	WBGene00021978	Y58A7A.4	c.320_321insTT	p.Val109fs	30.84
I	13768982	TGGA	T	disruptive_inframe_deletion	MODERATE	Y6B3B.4	WBGene00012389	Y6B3B.4	c.3297_3299delGGA	p.Glu1100del	30.39
II	7698960	G	GC	frameshift_variant	HIGH	moa-2	WBGene00015205	B0495.6	c.73dupG	p.Ala25fs	30.26
X	1615129	TC	T	frameshift_variant	HIGH	H11E01.3	WBGene00019188	H11E01.3	c.2109delC	p.Asn704fs	30.25
II	6084945	A	AG	frameshift_variant&splice_region_variant	HIGH	ptc-2	WBGene00004209	F21H12.4	c.863dupC	p.Ser289fs	30.22
V	6972737	A	AT	splice_region_variant&intron_variant	LOW	srx-59	WBGene00005950	T07H8.3	c.600+7_600+8insT		30
V	8063714	C	CTCGACGATGCTCATACTCCA	splice_region_variant&intron_variant	LOW	fbxa-223	WBGene00022630	ZC513.10	c.670+3_670+4insTGGAGTATGAGCATCGTCGA		29.74
II	1744949	TACAAGTGG	T	frameshift_variant	HIGH	clec-19	WBGene00018105	F36H5.6	c.380_387delCAAGTGGA	p.Thr127fs	29.52
V	13647423	T	TTCGTCG	conservative_inframe_insertion	MODERATE	H37A05.4	WBGene00044200	H37A05.4a	c.461_466dupCGACGA	p.Thr154_Thr155dup	29.5
V	13647423	T	TTCGTCG	conservative_inframe_insertion	MODERATE	H37A05.4	WBGene00044200	H37A05.4b	c.461_466dupCGACGA	p.Thr154_Thr155dup	29.5
X	14766703	TG	T	frameshift_variant	HIGH	Y16B4A.2	WBGene00012445	Y16B4A.2	c.3202delC	p.Gln1068fs	29.46
IV	2961082	TCCC	T	splice_region_variant&intron_variant	LOW	ser-6	WBGene00021897	Y54G2A.35a	c.347+8_347+10delCCC		28.92
IV	2961082	TCCC	T	splice_region_variant&intron_variant	LOW	ser-6	WBGene00021897	Y54G2A.35b	c.347+8_347+10delCCC		28.92
V	5755541	T	TGGAGGCGGC	disruptive_inframe_insertion	MODERATE	K09H11.11	WBGene00044541	K09H11.11	c.17_18insGCCGCCTCC	p.Lys6_Pro7insProProPro	28.7
V	6177179	C	CTT	frameshift_variant	HIGH	ttn-1	WBGene00006436	W06H8.8g	c.19956_19957insAA	p.Val6653fs	28.64
V	6177179	C	CTT	frameshift_variant	HIGH	ttn-1	WBGene00006436	W06H8.8e.2	c.19956_19957insAA	p.Val6653fs	28.64
V	6177179	C	CTT	frameshift_variant	HIGH	ttn-1	WBGene00006436	W06H8.8f.2	c.19956_19957insAA	p.Val6653fs	28.64
V	6177179	C	CTT	frameshift_variant	HIGH	ttn-1	WBGene00006436	W06H8.8e.1	c.19956_19957insAA	p.Val6653fs	28.64
V	6177179	C	CTT	frameshift_variant	HIGH	ttn-1	WBGene00006436	W06H8.8f.1	c.19956_19957insAA	p.Val6653fs	28.64
V	6177179	C	CTT	frameshift_variant	HIGH	ttn-1	WBGene00006436	W06H8.8d	c.19896_19897insAA	p.Val6633fs	28.64
X	14766734	CG	C	frameshift_variant	HIGH	Y16B4A.2	WBGene00012445	Y16B4A.2	c.3171delC	p.Gly1058fs	28.62
V	5084632	TGA	T	frameshift_variant	HIGH	Y58A7A.4	WBGene00021978	Y58A7A.4	c.326_327delTC	p.Val109fs	28.58
II	5078783	T	TG	frameshift_variant&splice_region_variant	HIGH	dsh-2	WBGene00001102	C27A2.6	c.1978dupC	p.His660fs	28.53
X	14766693	TG	T	frameshift_variant	HIGH	Y16B4A.2	WBGene00012445	Y16B4A.2	c.3212delC	p.Pro1071fs	28.46
V	6177176	CAA	C	frameshift_variant	HIGH	ttn-1	WBGene00006436	W06H8.8g	c.19958_19959delTT	p.Val6653fs	28.28
V	6177176	CAA	C	frameshift_variant	HIGH	ttn-1	WBGene00006436	W06H8.8e.2	c.19958_19959delTT	p.Val6653fs	28.28
V	6177176	CAA	C	frameshift_variant	HIGH	ttn-1	WBGene00006436	W06H8.8f.2	c.19958_19959delTT	p.Val6653fs	28.28
V	6177176	CAA	C	frameshift_variant	HIGH	ttn-1	WBGene00006436	W06H8.8e.1	c.19958_19959delTT	p.Val6653fs	28.28
V	6177176	CAA	C	frameshift_variant	HIGH	ttn-1	WBGene00006436	W06H8.8f.1	c.19958_19959delTT	p.Val6653fs	28.28
V	6177176	CAA	C	frameshift_variant	HIGH	ttn-1	WBGene00006436	W06H8.8d	c.19898_19899delTT	p.Val6633fs	28.28
II	6736536	CA	C	frameshift_variant	HIGH	T14B4.2	WBGene00020499	T14B4.2	c.284delA	p.Lys95fs	28.24
IV	3170032	C	CT	frameshift_variant	HIGH	Y67D8B.1	WBGene00022061	Y67D8B.1	c.1083_1084insA	p.Asp362fs	27.87
IV	3170033	A	ACAAAAAATGCGGGAGAAGAGACGCAGAGTTCTCAACTTTTTTCCTTTTGTTTAAGAACGTGCTGACG	frameshift_variant	HIGH	Y67D8B.1	WBGene00022061	Y67D8B.1	c.1082_1083insCGTCAGCACGTTCTTAAACAAAAGGAAAAAAGTTGAGAACTCTGCGTCTCTTCTCCCGCATTTTTTG	p.Asp362fs	27.87
V	5625702	CGATCCAAAATCT	C	disruptive_inframe_deletion	MODERATE	acy-4	WBGene00000071	T01C2.1	c.2573_2584delAGATTTTGGATC	p.Gln858_Asp861del	27.86
II	6721804	CA	C	frameshift_variant	HIGH	T14B4.t1	WBGene00023138	T14B4.t1	c.41delA	p.Asn14fs	27.83
I	2905525	TGC	T	frameshift_variant	HIGH	Y71F9AL.4	WBGene00022110	Y71F9AL.4	c.677_678delCG	p.Ala226fs	27.71
X	8941404	TGATC	T	frameshift_variant	HIGH	trk-1	WBGene00017039	D1073.1b	c.2510_2513delGATC	p.Arg837fs	27.52
X	8941404	TGATC	T	frameshift_variant	HIGH	trk-1	WBGene00017039	D1073.1a	c.2099_2102delGATC	p.Arg700fs	27.52
X	1615121	GC	G	frameshift_variant	HIGH	H11E01.3	WBGene00019188	H11E01.3	c.2103delC	p.Ser702fs	27.46
II	7697469	G	GC	frameshift_variant	HIGH	B0495.5	WBGene00015204	B0495.5.1	c.823_824insG	p.Ser275fs	27.43
II	7697469	G	GC	frameshift_variant	HIGH	B0495.5	WBGene00015204	B0495.5.2	c.823_824insG	p.Ser275fs	27.43
IV	12308328	GC	G	frameshift_variant	HIGH	oac-58	WBGene00019580	K09E10.2a	c.2052delG	p.Arg684fs	26.72
II	11027640	C	CCGTGAAGATCGCCGTGACCGAAGCAAGGATCGGGAGGATCGTCGTGATCGCAGTAAGGATCGAGACGATCGT	disruptive_inframe_insertion	MODERATE	let-858	WBGene00002957	F33A8.1	c.2567_2568insGGAGGATCGTCGTGATCGCAGTAAGGATCGAGACGATCGTCGTGAAGATCGCCGTGACCGAAGCAAGGATCG	p.Arg856_Glu857insGluAspArgArgAspArgSerLysAspArgAspAspArgArgGluAspArgArgAspArgSerLysAspArg	25.69
X	6357781	C	CCCAT	frameshift_variant	HIGH	C03B1.10	WBGene00015380	C03B1.10	c.88_91dupATGG	p.Gly31fs	25.6
II	4408048	CGCGTGGA	C	frameshift_variant	HIGH	ZK430.5	WBGene00022741	ZK430.5	c.692_698delGCGTGGA	p.Arg231fs	25.58
X	155403	C	CA	splice_region_variant&intron_variant	LOW	Y73B3A.10	WBGene00022212	Y73B3A.10	c.85-5_85-4insT		25
III	5953956	TG	T	frameshift_variant	HIGH	nono-1	WBGene00017778	F25B5.7a	c.1505delC	p.Pro502fs	24.34
III	5953956	TG	T	frameshift_variant	HIGH	nono-1	WBGene00017778	F25B5.7c	c.665delC	p.Pro222fs	24.34
I	1053922	GA	G	splice_region_variant	LOW	vps-4	WBGene00021334	Y34D9A.10	c.*439delT		23.81
III	10498224	AT	A	frameshift_variant	HIGH	F43D9.1	WBGene00009653	F43D9.1	c.3093delT	p.Gln1032fs	22.34
III	3348173	G	GT	splice_region_variant&intron_variant	LOW	gei-1	WBGene00001559	F45H7.2a	c.1318+5_1318+6insT		22.26
III	3348173	G	GT	splice_region_variant&intron_variant	LOW	gei-1	WBGene00001559	F45H7.2b	c.1318+5_1318+6insT		22.26
III	3348173	G	GT	splice_region_variant&intron_variant	LOW	gei-1	WBGene00001559	F45H7.2d.2	c.811+5_811+6insT		22.26
III	3348173	G	GT	splice_region_variant&intron_variant	LOW	gei-1	WBGene00001559	F45H7.2d.1	c.811+5_811+6insT		22.26
V	15688539	G	GT	splice_region_variant&intron_variant	LOW	nhr-197	WBGene00010602	K06B4.7	c.396+5_396+6insT		22.14
II	2903191	CA	C	frameshift_variant	HIGH	Y110A2AM.1	WBGene00022449	Y110A2AM.1	c.810delT	p.Phe270fs	20.33
III	2425066	GC	G	frameshift_variant	HIGH	W04B5.2	WBGene00021019	W04B5.2	c.389delC	p.Pro130fs	20.18
V	15432432	C	CTCGAGTATGCTGAA	frameshift_variant	HIGH	T26H5.8	WBGene00012070	T26H5.8.1	c.5_6insTTCAGCATACTCGA	p.Glu2fs	19.48
V	15432432	C	CTCGAGTATGCTGAA	frameshift_variant	HIGH	T26H5.8	WBGene00012070	T26H5.8.4	c.5_6insTTCAGCATACTCGA	p.Glu2fs	19.48
V	15432432	C	CTCGAGTATGCTGAA	frameshift_variant	HIGH	T26H5.8	WBGene00012070	T26H5.8.2	c.5_6insTTCAGCATACTCGA	p.Glu2fs	19.48
V	15432432	C	CTCGAGTATGCTGAA	frameshift_variant	HIGH	T26H5.8	WBGene00012070	T26H5.8.3	c.5_6insTTCAGCATACTCGA	p.Glu2fs	19.48
IV	7727258	AGTCG	A	frameshift_variant	HIGH	C50F7.5	WBGene00016845	C50F7.5	c.541_544delGTCG	p.Val181fs	18.98
IV	7727263	ATCCATCCGAAGATCCTCAACCTTCTGGATCATCATCTCCAGGACCAG	A	frameshift_variant	HIGH	C50F7.5	WBGene00016845	C50F7.5	c.547_593delCCATCCGAAGATCCTCAACCTTCTGGATCATCATCTCCAGGACCAGT	p.Pro183fs	17.96
II	3834843	GC	G	frameshift_variant	HIGH	oac-4	WBGene00015873	C17A2.5	c.991delG	p.Ala331fs	17.19
V	6174186	GTCCTTCTCCTGTTTCAGTTTATCATCCTTCTCCTTTTGCAGTTTAGCATTAGCCTCCTGTTTGAAATTATCA	G	disruptive_inframe_deletion	MODERATE	ttn-1	WBGene00006436	W06H8.8g	c.22878_22949delTGATAATTTCAAACAGGAGGCTAATGCTAAACTGCAAAAGGAGAAGGATGATAAACTGAAACAGGAGAAGGA	p.Asp7627_Asp7650del	16.37
V	6174186	GTCCTTCTCCTGTTTCAGTTTATCATCCTTCTCCTTTTGCAGTTTAGCATTAGCCTCCTGTTTGAAATTATCA	G	disruptive_inframe_deletion	MODERATE	ttn-1	WBGene00006436	W06H8.8e.2	c.22878_22949delTGATAATTTCAAACAGGAGGCTAATGCTAAACTGCAAAAGGAGAAGGATGATAAACTGAAACAGGAGAAGGA	p.Asp7627_Asp7650del	16.37
V	6174186	GTCCTTCTCCTGTTTCAGTTTATCATCCTTCTCCTTTTGCAGTTTAGCATTAGCCTCCTGTTTGAAATTATCA	G	disruptive_inframe_deletion	MODERATE	ttn-1	WBGene00006436	W06H8.8f.2	c.22878_22949delTGATAATTTCAAACAGGAGGCTAATGCTAAACTGCAAAAGGAGAAGGATGATAAACTGAAACAGGAGAAGGA	p.Asp7627_Asp7650del	16.37
V	6174186	GTCCTTCTCCTGTTTCAGTTTATCATCCTTCTCCTTTTGCAGTTTAGCATTAGCCTCCTGTTTGAAATTATCA	G	disruptive_inframe_deletion	MODERATE	ttn-1	WBGene00006436	W06H8.8e.1	c.22878_22949delTGATAATTTCAAACAGGAGGCTAATGCTAAACTGCAAAAGGAGAAGGATGATAAACTGAAACAGGAGAAGGA	p.Asp7627_Asp7650del	16.37
V	6174186	GTCCTTCTCCTGTTTCAGTTTATCATCCTTCTCCTTTTGCAGTTTAGCATTAGCCTCCTGTTTGAAATTATCA	G	disruptive_inframe_deletion	MODERATE	ttn-1	WBGene00006436	W06H8.8f.1	c.22878_22949delTGATAATTTCAAACAGGAGGCTAATGCTAAACTGCAAAAGGAGAAGGATGATAAACTGAAACAGGAGAAGGA	p.Asp7627_Asp7650del	16.37
V	6174186	GTCCTTCTCCTGTTTCAGTTTATCATCCTTCTCCTTTTGCAGTTTAGCATTAGCCTCCTGTTTGAAATTATCA	G	disruptive_inframe_deletion	MODERATE	ttn-1	WBGene00006436	W06H8.8d	c.22818_22889delTGATAATTTCAAACAGGAGGCTAATGCTAAACTGCAAAAGGAGAAGGATGATAAACTGAAACAGGAGAAGGA	p.Asp7607_Asp7630del	16.37
II	3834846	TAA	T	frameshift_variant	HIGH	oac-4	WBGene00015873	C17A2.5	c.987_988delTT	p.Tyr330fs	16.36
II	8347171	G	GC	splice_region_variant&intron_variant	LOW	eff-1	WBGene00001159	C26D10.5a	c.345+5_345+6insC		16.33
II	8347171	G	GC	splice_region_variant&intron_variant	LOW	eff-1	WBGene00001159	C26D10.5c	c.345+5_345+6insC		16.33
II	8347171	G	GC	splice_region_variant&intron_variant	LOW	eff-1	WBGene00001159	C26D10.5d	c.345+5_345+6insC		16.33
II	8347171	G	GC	splice_region_variant&intron_variant	LOW	eff-1	WBGene00001159	C26D10.5b	c.345+5_345+6insC		16.33
II	3834811	TGCATAAATGGGCATAAATGGGCCAATGAA	T	frameshift_variant	HIGH	oac-4	WBGene00015873	C17A2.5	c.995_1023delTTCATTGGCCCATTTATGCCCATTTATGC	p.Phe332fs	16.27
I	4765848	T	TTAAAAC	splice_region_variant&intron_variant	LOW	M04F3.2	WBGene00019768	M04F3.2	c.91+4_91+5insTAAAAC		16.18
I	238051	A	AT	splice_region_variant&intron_variant	LOW	Y48G1BM.6	WBGene00021671	Y48G1BM.6	c.193+8_193+9insA		15.8
III	9101442	G	GAGTC	splice_region_variant&intron_variant	LOW	ZK507.3	WBGene00013979	ZK507.3	c.71+5_71+6insAGTC		15.75
II	3834850	TGGGCCAATGA	T	frameshift_variant	HIGH	oac-4	WBGene00015873	C17A2.5	c.975_984delTCATTGGCCC	p.His326fs	15.74
I	232098	TG	T	frameshift_variant	HIGH	Y48G1BM.6	WBGene00021671	Y48G1BM.6	c.3373delC	p.Gln1125fs	15.54
IV	6922206	CAGAAGGTAATGCTTCTCGTCGTCCACCACCACCACCGAAGGGAACTGGAACCCCACCACCACCACCAACTGGAGAACCACAGGATCTTTCTGG	C,*	frameshift_variant&splice_acceptor_variant&splice_region_variant&intron_variant	HIGH	T22D1.2	WBGene00020681	T22D1.2	c.266-2_356delAGAAGGTAATGCTTCTCGTCGTCCACCACCACCACCGAAGGGAACTGGAACCCCACCACCACCACCAACTGGAGAACCACAGGATCTTTCTGG	p.Gly90fs	15.08
I	238082	G	GTTGGTGGTCGC	frameshift_variant	HIGH	Y48G1BM.6	WBGene00021671	Y48G1BM.6	c.170_171insGCGACCACCAA	p.Phe58fs	14.7
II	7123724	TCAACAACAACAACAACAACA	T	frameshift_variant	HIGH	F10E7.2	WBGene00017344	F10E7.2	c.187_206delCAACAACAACAACAACAACA	p.Gln63fs	14.69
III	10511310	G	GT	splice_region_variant&intron_variant	LOW	F43D9.3	WBGene00009654	F43D9.3a	c.1772+5_1772+6insT		14.68
III	10511310	G	GT	splice_region_variant&intron_variant	LOW	F43D9.3	WBGene00009654	F43D9.3b	c.1772+5_1772+6insT		14.68
II	3568868	TTG	T	frameshift_variant	HIGH	clec-127	WBGene00021138	W10G11.5	c.296_297delCA	p.Ser99fs	14.51
IV	7598147	C	CAGA	conservative_inframe_insertion	MODERATE	tag-80	WBGene00018468	F45E4.3a	c.8383_8385dupGAA	p.Glu2795dup	14.29
IV	7598147	C	CAGA	conservative_inframe_insertion	MODERATE	tag-80	WBGene00018468	F45E4.3b	c.8383_8385dupGAA	p.Glu2795dup	14.29
II	7123720	AT	A	frameshift_variant	HIGH	F10E7.2	WBGene00017344	F10E7.2	c.184delT	p.Tyr62fs	13.98
V	20825949	GT	G	splice_region_variant&intron_variant	LOW	grl-14	WBGene00001723	T03D8.4a	c.264+6delT		13.98
V	20825949	GT	G	splice_region_variant&intron_variant	LOW	grl-14	WBGene00001723	T03D8.4b	c.264+6delT		13.98
V	20825949	GT	G	splice_region_variant&intron_variant	LOW	grl-14	WBGene00001723	T03D8.4c	c.264+6delT		13.98
I	11629703	GT	G	splice_region_variant&intron_variant	LOW	W04G5.3	WBGene00012264	W04G5.3	c.58+6delT		13.94
X	7710413	TCC	T	frameshift_variant	HIGH	K09F5.4	WBGene00019583	K09F5.4	c.193_194delGG	p.Gly65fs	13.77
X	15748079	C	CG	frameshift_variant	HIGH	ZK678.t2	WBGene00014627	ZK678.t2	c.51dupG	p.Phe18fs	13.06
II	3833732	CGAAAAT	C	conservative_inframe_deletion	MODERATE	oac-4	WBGene00015873	C17A2.5	c.1762_1767delATTTTC	p.Ile588_Phe589del	11.68
IV	16494486	A	AC	frameshift_variant	HIGH	Y51H4A.2	WBGene00013099	Y51H4A.2	c.24dupG	p.Ser9fs	11.32
II	3833794	G	GAAATGGCTAGTTTAGGGGTGACAGGC	splice_region_variant&intron_variant	LOW	oac-4	WBGene00015873	C17A2.5	c.1710-5_1710-4insGCCTGTCACCCCTAAACTAGCCATTT		10.84
II	3568871	AC	A	frameshift_variant	HIGH	clec-127	WBGene00021138	W10G11.5	c.294delG	p.Ser99fs	10.28
V	17116108	T	TGTGTGG	disruptive_inframe_insertion	MODERATE	ZK218.8	WBGene00013942	ZK218.8	c.83_84insGTGTGG	p.Leu28_Val29insCysGly	10.2
II	3833914	A	ACTTGGG	disruptive_inframe_insertion	MODERATE	oac-4	WBGene00015873	C17A2.5	c.1625_1626insCCCAAG	p.Phe542_Phe543insProSer	9.56
I	1382293	CA	C	frameshift_variant	HIGH	Y92H12BL.4	WBGene00022365	Y92H12BL.4	c.383delT	p.Leu128fs	9.53
II	12606863	TG	T	splice_region_variant&intron_variant	LOW	lips-15	WBGene00012585	Y38E10A.7	c.783+7delG		9.12
II	3833909	G	GC	frameshift_variant	HIGH	oac-4	WBGene00015873	C17A2.5	c.1630_1631insG	p.Ser544fs	8.84
II	3833910	A	ATTTTCGGC	frameshift_variant	HIGH	oac-4	WBGene00015873	C17A2.5	c.1629_1630insGCCGAAAA	p.Ser544fs	8.84
I	237847	G	GCA	frameshift_variant	HIGH	Y48G1BM.6	WBGene00021671	Y48G1BM.6	c.199_200insTG	p.Thr67fs	7.79
I	10930076	G	GA	splice_region_variant&intron_variant	LOW	F49D11.10	WBGene00045433	F49D11.10.1	c.938-4_938-3insT		7.3
I	10930076	G	GA	splice_region_variant&intron_variant	LOW	F49D11.10	WBGene00045433	F49D11.10.2	c.938-4_938-3insT		7.3
IV	6922145	GCCACCGAAGGAACTGGAACCCCACCACCACCACCAACTGGAGAACCACAGGATCTTTCTACAGAAGGTAATGCTTCTCGTCGTCCACCACCA	G	frameshift_variant&splice_acceptor_variant&splice_region_variant&intron_variant	HIGH	T22D1.2	WBGene00020681	T22D1.2	c.265+27_294delCCACCGAAGGAACTGGAACCCCACCACCACCACCAACTGGAGAACCACAGGATCTTTCTACAGAAGGTAATGCTTCTCGTCGTCCACCACCA	p.Glu89fs	6.63
X	14335748	A	ACC	frameshift_variant	HIGH	K04G11.1	WBGene00010570	K04G11.1	c.265_266dupCC	p.Pro90fs	6.43
I	237841	GAT	G	frameshift_variant	HIGH	Y48G1BM.6	WBGene00021671	Y48G1BM.6	c.204_205delAT	p.Ser69fs	6.28
V	6173024	TCAGTTTAGCATCAGCCTCCTGTTTCAGTTTATCGTCCTTCTCCTTTTG	T	conservative_inframe_deletion	MODERATE	ttn-1	WBGene00006436	W06H8.8g	c.24064_24111delCAAAAGGAGAAGGACGATAAACTGAAACAGGAGGCTGATGCTAAACTG	p.Gln8022_Leu8037del	6.26
V	6173024	TCAGTTTAGCATCAGCCTCCTGTTTCAGTTTATCGTCCTTCTCCTTTTG	T	conservative_inframe_deletion	MODERATE	ttn-1	WBGene00006436	W06H8.8e.2	c.24064_24111delCAAAAGGAGAAGGACGATAAACTGAAACAGGAGGCTGATGCTAAACTG	p.Gln8022_Leu8037del	6.26
V	6173024	TCAGTTTAGCATCAGCCTCCTGTTTCAGTTTATCGTCCTTCTCCTTTTG	T	conservative_inframe_deletion	MODERATE	ttn-1	WBGene00006436	W06H8.8f.2	c.24064_24111delCAAAAGGAGAAGGACGATAAACTGAAACAGGAGGCTGATGCTAAACTG	p.Gln8022_Leu8037del	6.26
V	6173024	TCAGTTTAGCATCAGCCTCCTGTTTCAGTTTATCGTCCTTCTCCTTTTG	T	conservative_inframe_deletion	MODERATE	ttn-1	WBGene00006436	W06H8.8e.1	c.24064_24111delCAAAAGGAGAAGGACGATAAACTGAAACAGGAGGCTGATGCTAAACTG	p.Gln8022_Leu8037del	6.26
V	6173024	TCAGTTTAGCATCAGCCTCCTGTTTCAGTTTATCGTCCTTCTCCTTTTG	T	conservative_inframe_deletion	MODERATE	ttn-1	WBGene00006436	W06H8.8f.1	c.24064_24111delCAAAAGGAGAAGGACGATAAACTGAAACAGGAGGCTGATGCTAAACTG	p.Gln8022_Leu8037del	6.26
V	6173024	TCAGTTTAGCATCAGCCTCCTGTTTCAGTTTATCGTCCTTCTCCTTTTG	T	conservative_inframe_deletion	MODERATE	ttn-1	WBGene00006436	W06H8.8d	c.24004_24051delCAAAAGGAGAAGGACGATAAACTGAAACAGGAGGCTGATGCTAAACTG	p.Gln8002_Leu8017del	6.26
I	4001952	TGA	T	splice_region_variant&intron_variant	LOW	unc-73	WBGene00006805	F55C7.7d.2	c.*138-4_*138-3delTC		6.25
I	4001952	TGA	T	splice_region_variant&intron_variant	LOW	unc-73	WBGene00006805	F55C7.7e.2	c.*138-4_*138-3delTC		6.25
I	4001952	TGA	T	splice_region_variant&intron_variant	LOW	unc-73	WBGene00006805	F55C7.7f.2	c.*138-4_*138-3delTC		6.25
I	4001952	TGA	T	splice_region_variant&intron_variant	LOW	unc-73	WBGene00006805	F55C7.7g.2	c.*138-4_*138-3delTC		6.25
III	10689248	AT	A	splice_region_variant&intron_variant	LOW	Y39A1A.17	WBGene00012655	Y39A1A.17	c.599-6delA		4.9
II	1412658	GT	G	splice_donor_variant&intron_variant	HIGH	Y51H7C.5	WBGene00021783	Y51H7C.5.1	c.130+2delT		4.55
II	1412658	GT	G	splice_donor_variant&intron_variant	HIGH	Y51H7C.5	WBGene00021783	Y51H7C.5.2	c.130+2delT		4.55
II	12606904	GAT	G	splice_region_variant&intron_variant	LOW	lips-15	WBGene00012585	Y38E10A.7	c.784-9_784-8delAT		4.5
IV	4101430	G	GT	splice_region_variant&intron_variant	LOW	C35B1.2	WBGene00016432	C35B1.2a	c.1466+5_1466+6insT		4.29
I	237820	TGA	T	frameshift_variant	HIGH	Y48G1BM.6	WBGene00021671	Y48G1BM.6	c.225_226delTC	p.Thr77fs	4.1
II	14256796	CT	C	frameshift_variant	HIGH	Y54G11A.19	WBGene00235256	Y54G11A.19	c.83delA	p.Lys28fs	4.05
III	2686945	G	GT	splice_region_variant&intron_variant	LOW	Y71H2AL.2	WBGene00022165	Y71H2AL.2	c.150+5_150+6insT		4.04
I	11090124	ACTT	A	frameshift_variant&splice_donor_variant&splice_region_variant&intron_variant	HIGH	hmr-1	WBGene00001980	W02B9.1c.1	c.172_173+1delAAG	p.Lys58fs	3.55
I	11090124	ACTT	A	frameshift_variant&splice_donor_variant&splice_region_variant&intron_variant	HIGH	hmr-1	WBGene00001980	W02B9.1c.2	c.172_173+1delAAG	p.Lys58fs	3.55
III	12165449	TCAG	T	conservative_inframe_deletion	MODERATE	Y75B8A.8	WBGene00013545	Y75B8A.8	c.361_363delCAG	p.Gln121del	3.38
IV	12491329	CAGA	C	disruptive_inframe_deletion	MODERATE	him-6	WBGene00001865	T04A11.6	c.494_496delAAG	p.Glu165del	3.38
I	2903887	G	GT	splice_donor_variant&intron_variant	HIGH	Y71F9AL.4	WBGene00022110	Y71F9AL.4	c.123+1_123+2insT		3.33
X	2504203	G	GA	splice_region_variant&intron_variant	LOW	K02E10.7	WBGene00019321	K02E10.7	c.346-4_346-3insT		3.31
V	1642947	G	GCC	frameshift_variant	HIGH	Y46H3D.1	WBGene00021608	Y46H3D.1	c.107_108insCC	p.Thr37fs	3.29
III	13377530	G	GT	splice_region_variant	LOW	T03F6.10	WBGene00185005	T03F6.10.1	c.*128dupA		3.15
X	6470739	GA	G	splice_region_variant&intron_variant	LOW	C15B12.4	WBGene00015786	C15B12.4	c.1418-4delT		3.08
V	15896570	G	GA	splice_region_variant&intron_variant	LOW	nhr-213	WBGene00011520	T06C12.13a	c.147-5_147-4insT		2.89
V	15896570	G	GA	splice_region_variant&intron_variant	LOW	nhr-213	WBGene00011520	T06C12.13b	c.147-5_147-4insT		2.89
V	2121149	G	GT	frameshift_variant	HIGH	F22F7.8	WBGene00194908	F22F7.8	c.64dupA	p.Thr22fs	2.87
II	1729097	GT	G	splice_region_variant&intron_variant	LOW	btb-9	WBGene00018435	F45C12.4	c.447+6delT		2.68
V	17657840	G	GA	splice_region_variant&intron_variant	LOW	fbxa-108	WBGene00010293	F59A1.7	c.120-4_120-3insT		2.66
X	3083800	GA	G	frameshift_variant	HIGH	twk-16	WBGene00006670	F52E4.4	c.492delA	p.Asp165fs	2.66
IV	13370908	G	GT	splice_region_variant&intron_variant	LOW	Y62E10A.2	WBGene00013373	Y62E10A.2.1	c.-108+7_-108+8insT		2.57
IV	13370908	G	GT	splice_region_variant&intron_variant	LOW	Y62E10A.2	WBGene00013373	Y62E10A.2.4	c.-108+7_-108+8insT		2.57
IV	13370908	G	GT	splice_region_variant&intron_variant	LOW	Y62E10A.2	WBGene00013373	Y62E10A.2.3	c.-108+7_-108+8insT		2.57
V	13598732	AT	A	splice_region_variant&intron_variant	LOW	rdy-2	WBGene00004328	F53F4.6a	c.792-8delA		2.54
II	2472838	CA	C	frameshift_variant	HIGH	tsr-1	WBGene00006647	F53G2.6	c.24delT	p.Phe8fs	2.53
X	8292421	G	GT	splice_region_variant&intron_variant	LOW	F13B9.1	WBGene00017419	F13B9.1a	c.4025+5_4025+6insT		2.5
X	8292421	G	GT	splice_region_variant&intron_variant	LOW	F13B9.1	WBGene00017419	F13B9.1c	c.3959+5_3959+6insT		2.5
X	8292421	G	GT	splice_region_variant&intron_variant	LOW	F13B9.1	WBGene00017419	F13B9.1b	c.3959+5_3959+6insT		2.5
V	12839379	G	GT	splice_region_variant&intron_variant	LOW	C44H9.4	WBGene00008099	C44H9.4	c.3162+5_3162+6insT		2.47
IV	4445238	C	CT	frameshift_variant	HIGH	wapl-1	WBGene00019953	R08C7.10b	c.408dupA	p.Asp137fs	2.38
IV	4445238	C	CT	frameshift_variant	HIGH	wapl-1	WBGene00019953	R08C7.10a	c.402dupA	p.Asp135fs	2.38
IV	4445238	C	CT	frameshift_variant	HIGH	wapl-1	WBGene00019953	R08C7.10d	c.408dupA	p.Asp137fs	2.38
IV	4445238	C	CT	frameshift_variant	HIGH	wapl-1	WBGene00019953	R08C7.10c	c.402dupA	p.Asp135fs	2.38
I	14390463	G	GT	splice_region_variant&intron_variant	LOW	lev-10	WBGene00002977	Y105E8A.7a	c.76+5_76+6insT		2.37
I	14390463	G	GT	splice_region_variant&intron_variant	LOW	lev-10	WBGene00002977	Y105E8A.7e	c.76+5_76+6insT		2.37
I	14390463	G	GT	splice_region_variant&intron_variant	LOW	lev-10	WBGene00002977	Y105E8A.7b	c.76+5_76+6insT		2.37
I	9479943	GT	G	splice_region_variant&intron_variant	LOW	F30A10.2	WBGene00009261	F30A10.2	c.157-8delA		2.3
X	879150	G	GT	splice_region_variant&intron_variant	LOW	ZC13.1	WBGene00022502	ZC13.1b	c.1146+5_1146+6insT		2.19
X	879150	G	GT	splice_region_variant&intron_variant	LOW	ZC13.1	WBGene00022502	ZC13.1a	c.*170+5_*170+6insT		2.19
V	9072164	G	GA	splice_region_variant&intron_variant	LOW	oac-50	WBGene00020864	T27E4.6	c.624-5_624-4insT		2.16
I	6418594	TA	T	frameshift_variant	HIGH	R10A10.1	WBGene00019992	R10A10.1	c.42delA	p.Asp15fs	2.11
II	3986098	AGAC	A	conservative_inframe_deletion	MODERATE	lin-31	WBGene00003017	K10G6.1	c.361_363delGAC	p.Asp121del	2.1
III	10915273	GTCA	G	disruptive_inframe_deletion	MODERATE	cut-6	WBGene00000853	M142.2.1	c.1484_1486delATC	p.His495del	2.1
III	10915273	GTCA	G	disruptive_inframe_deletion	MODERATE	cut-6	WBGene00000853	M142.2.2	c.1484_1486delATC	p.His495del	2.1
X	16408956	G	GA	splice_region_variant&intron_variant	LOW	eat-17	WBGene00020770	T24D11.1e	c.221-4_221-3insT		2.08
X	16408956	G	GA	splice_region_variant&intron_variant	LOW	eat-17	WBGene00020770	T24D11.1a	c.41-4_41-3insT		2.08
X	16408956	G	GA	splice_region_variant&intron_variant	LOW	eat-17	WBGene00020770	T24D11.1b	c.221-4_221-3insT		2.08
I	5055731	G	GA	frameshift_variant	HIGH	C46H11.1	WBGene00016727	C46H11.1	c.56dupA	p.Met20fs	2.05
II	2022673	G	GT	splice_region_variant	LOW	cya-2	WBGene00000864	F59H6.7	c.*129dupA		2.03
IV	16780615	T	TG	frameshift_variant	HIGH	Y43D4A.5	WBGene00012791	Y43D4A.5a	c.3919dupG	p.Asp1307fs	1.91
IV	16780615	T	TG	frameshift_variant	HIGH	Y43D4A.5	WBGene00012791	Y43D4A.5b	c.1153dupG	p.Asp385fs	1.91
IV	16780615	T	TG	frameshift_variant	HIGH	Y43D4A.5	WBGene00012791	Y43D4A.5c	c.3919dupG	p.Asp1307fs	1.91
IV	16780615	T	TG	frameshift_variant	HIGH	Y43D4A.5	WBGene00012791	Y43D4A.5d	c.1153dupG	p.Asp385fs	1.91
IV	16780618	T	TG	frameshift_variant	HIGH	Y43D4A.5	WBGene00012791	Y43D4A.5a	c.3921_3922insG	p.Met1308fs	1.91
IV	16780618	T	TG	frameshift_variant	HIGH	Y43D4A.5	WBGene00012791	Y43D4A.5b	c.1155_1156insG	p.Met386fs	1.91
IV	16780618	T	TG	frameshift_variant	HIGH	Y43D4A.5	WBGene00012791	Y43D4A.5c	c.3921_3922insG	p.Met1308fs	1.91
IV	16780618	T	TG	frameshift_variant	HIGH	Y43D4A.5	WBGene00012791	Y43D4A.5d	c.1155_1156insG	p.Met386fs	1.91
X	4169489	G	GT	splice_region_variant&intron_variant	LOW	ZK470.14	WBGene00219362	ZK470.14	c.984+6_984+7insT		1.88
V	20596476	G	GA	splice_region_variant&intron_variant	LOW	F46B3.1	WBGene00009756	F46B3.1	c.345-4_345-3insT		1.75
IV	717910	CA	C	splice_region_variant	LOW	clec-164	WBGene00021949	Y55F3C.5	c.*71delA		1.65
V	2163605	A	AT	splice_region_variant&intron_variant	LOW	str-255	WBGene00006281	C45H4.15	c.184-7_184-6insA		1.58
X	10585345	G	GA	splice_region_variant&intron_variant	LOW	F57C7.4	WBGene00010200	F57C7.4	c.2227-4_2227-3insT		1.57
III	3841089	G	GT	splice_region_variant&intron_variant	LOW	C36A4.11	WBGene00044167	C36A4.11.1	c.199+5_199+6insT		1.48
III	3841089	G	GT	splice_region_variant&intron_variant	LOW	C36A4.11	WBGene00044167	C36A4.11.2	c.199+5_199+6insT		1.48
II	11412771	A	AT	splice_region_variant&intron_variant	LOW	C05D12.1	WBGene00007339	C05D12.1.1	c.1289-6_1289-5insA		1.4
II	11412771	A	AT	splice_region_variant&intron_variant	LOW	C05D12.1	WBGene00007339	C05D12.1.2	c.1289-6_1289-5insA		1.4
X	4835934	TA	T	splice_region_variant&intron_variant	LOW	F39C12.1	WBGene00018193	F39C12.1	c.14665-3delT		1.37
I	2617210	CCT	C	frameshift_variant	HIGH	ctn-1	WBGene00000832	Y23H5A.5a	c.2412_2413delTC	p.His805fs	1.3
X	5871380	GT	G	splice_region_variant&intron_variant	LOW	ctbp-1	WBGene00006424	F49E10.5a	c.1360+6delT		1.27
X	5871380	GT	G	splice_region_variant&intron_variant	LOW	ctbp-1	WBGene00006424	F49E10.5b	c.997+6delT		1.27
X	4181392	A	ATC	frameshift_variant	HIGH	mrp-6	WBGene00003412	F20B6.3	c.2625_2626insGA	p.Phe876fs	1.25
X	4181396	G	GCACGGGCTTCTTCCGGGCTGTTAAATTCCCCTACGCCATACCAACCGAAC	frameshift_variant	HIGH	mrp-6	WBGene00003412	F20B6.3	c.2621_2622insGTTCGGTTGGTATGGCGTAGGGGAATTTAACAGCCCGGAAGAAGCCCGTG	p.Thr875fs	1.25
X	4181398	G	GCGCAGCTCCTGCGACGGTCGTTTCGGCATCGTCGAGAACTTTTACCGGAATATCAAGCATATTGGC	conservative_inframe_insertion	MODERATE	mrp-6	WBGene00003412	F20B6.3	c.2619_2620insGCCAATATGCTTGATATTCCGGTAAAAGTTCTCGACGATGCCGAAACGACCGTCGCAGGAGCTGCG	p.Glu873_Leu874insAlaAsnMetLeuAspIleProValLysValLeuAspAspAlaGluThrThrValAlaGlyAlaAla	1.25
IV	12269689	G	GA	splice_region_variant&intron_variant	LOW	C42C1.3	WBGene00016581	C42C1.3b	c.529-4_529-3insT		1.22
IV	12269689	G	GA	splice_region_variant&intron_variant	LOW	C42C1.3	WBGene00016581	C42C1.3a	c.523-4_523-3insT		1.22
V	7021768	A	AT	frameshift_variant&start_lost	HIGH	F20A1.4	WBGene00017616	F20A1.4	c.1dupA	p.Met1fs	0.87

## Sheet: 6. CFJ77 - SNPs
Chr	Positions	Ref	Alt	Type	Impact	Gene	WBGene	Transcript	Change	AA change	quality by depth (~12 = hetrozygous, ~30 = homozygous)
II	3797360	A	T	synonymous_variant	LOW	Y8A9A.2	WBGene00021171	Y8A9A.2	c.1536A>T	p.Thr512Thr	38.77
II	1684494	G	A	missense_variant	MODERATE	fbxb-25	WBGene00019034	F58E1.2	c.397G>A	p.Gly133Arg	36.09
V	3519267	T	G	missense_variant	MODERATE	str-227	WBGene00006258	C07G3.3	c.619T>G	p.Leu207Val	34.97
II	5974584	T	C	missense_variant	MODERATE	B0034.5	WBGene00015005	B0034.5	c.311A>G	p.Lys104Arg	34.94
II	7003307	T	C	missense_variant	MODERATE	C52E12.t2	WBGene00022966	C52E12.t2	c.35T>C	p.Val12Ala	34.8
IV	7482096	G	C	missense_variant	MODERATE	rod-1	WBGene00018900	F55G1.4	c.3296G>C	p.Ser1099Thr	34.73
II	6721813	G	C	stop_lost	HIGH	T14B4.t1	WBGene00023138	T14B4.t1	c.48G>C	p.Ter16Tyrext*?	34.65
II	7107557	C	T	missense_variant	MODERATE	F10E7.9	WBGene00017350	F10E7.9	c.880G>A	p.Gly294Ser	34.59
X	14717527	G	A	synonymous_variant	LOW	tag-53	WBGene00006432	F33C8.1a	c.3633G>A	p.Arg1211Arg	34.48
X	14717527	G	A	synonymous_variant	LOW	tag-53	WBGene00006432	F33C8.1b	c.3522G>A	p.Arg1174Arg	34.48
V	15159894	C	T	missense_variant	MODERATE	str-45	WBGene00006110	T09F5.3	c.704C>T	p.Thr235Ile	34.39
II	6896377	T	A	splice_region_variant&intron_variant	LOW	C44B7.11	WBGene00016631	C44B7.11	c.877-5A>T		34.34
II	1604202	C	A	synonymous_variant	LOW	bath-47	WBGene00006464	T07H3.1	c.1785C>A	p.Ile595Ile	34.31
II	10313373	T	C	missense_variant	MODERATE	gcy-5	WBGene00001532	ZK970.6	c.1907A>G	p.Gln636Arg	34.22
V	17598297	G	A	synonymous_variant	LOW	Y6G8.2	WBGene00012404	Y6G8.2a	c.81C>T	p.Leu27Leu	34.14
II	700822	C	T	missense_variant	MODERATE	T02H6.11	WBGene00020181	T02H6.11.1	c.247G>A	p.Gly83Ser	34.01
II	700822	C	T	missense_variant	MODERATE	T02H6.11	WBGene00020181	T02H6.11.2	c.247G>A	p.Gly83Ser	34.01
II	6549864	A	G	missense_variant	MODERATE	tag-184	WBGene00007050	F18C5.3	c.832A>G	p.Met278Val	33.97
X	15227136	A	G	synonymous_variant	LOW	H03A11.2	WBGene00010357	H03A11.2	c.2883T>C	p.Gly961Gly	33.66
IV	11226271	A	C	missense_variant	MODERATE	col-125	WBGene00000699	C29F4.1	c.686A>C	p.Gln229Pro	33.61
III	2405335	C	T	splice_region_variant&intron_variant	LOW	H14E04.1	WBGene00019198	H14E04.1	c.646-8C>T		33.42
V	5084795	A	G	synonymous_variant	LOW	Y58A7A.4	WBGene00021978	Y58A7A.4	c.213T>C	p.Asp71Asp	33.4
IV	10950153	T	C	splice_region_variant&intron_variant	LOW	Y69E1A.2	WBGene00013474	Y69E1A.2	c.268+8T>C		33.39
II	6628950	C	G	stop_gained	HIGH	F54H5.2	WBGene00018839	F54H5.2a	c.968C>G	p.Ser323*	33.37
II	6628950	C	G	stop_gained	HIGH	F54H5.2	WBGene00018839	F54H5.2b	c.206C>G	p.Ser69*	33.37
II	6628950	C	G	stop_gained	HIGH	F54H5.2	WBGene00018839	F54H5.2c	c.86C>G	p.Ser29*	33.37
IV	7596481	T	A	missense_variant	MODERATE	tag-80	WBGene00018468	F45E4.3a	c.6782T>A	p.Val2261Glu	33.28
IV	7596481	T	A	missense_variant	MODERATE	tag-80	WBGene00018468	F45E4.3b	c.6782T>A	p.Val2261Glu	33.28
III	6090953	G	C	missense_variant	MODERATE	C05D10.4	WBGene00015480	C05D10.4b	c.529C>G	p.Pro177Ala	33.25
III	6090953	G	C	missense_variant	MODERATE	C05D10.4	WBGene00015480	C05D10.4a	c.433C>G	p.Pro145Ala	33.25
III	6090953	G	C	5_prime_UTR_premature_start_codon_gain_variant	LOW	C05D10.4	WBGene00015480	C05D10.4c	c.-9C>G		33.25
V	16816504	T	C	splice_region_variant&intron_variant	LOW	T20B3.1	WBGene00011850	T20B3.1	c.381-3T>C		33.17
III	10368882	C	G	splice_region_variant&synonymous_variant	LOW	tbc-8	WBGene00008018	C38H2.1a	c.801C>G	p.Ser267Ser	32.85
III	10368882	C	G	splice_region_variant&synonymous_variant	LOW	tbc-8	WBGene00008018	C38H2.1b	c.117C>G	p.Ser39Ser	32.85
I	10270601	A	G	synonymous_variant	LOW	ZC247.1	WBGene00013859	ZC247.1	c.7350T>C	p.Ile2450Ile	32.84
V	14424443	G	T	missense_variant	MODERATE	rrbs-1	WBGene00007617	C15H11.9	c.508C>A	p.Leu170Ile	32.59
II	13440675	G	T	missense_variant	MODERATE	tbc-15	WBGene00013016	Y48E1C.3	c.263C>A	p.Thr88Lys	32.58
X	15227130	C	A	missense_variant	MODERATE	H03A11.2	WBGene00010357	H03A11.2	c.2889G>T	p.Gln963His	32.58
II	3360599	C	A	missense_variant	MODERATE	bath-27	WBGene00017450	F14D2.1	c.290C>A	p.Ser97Tyr	32.49
X	15226938	C	T	synonymous_variant	LOW	H03A11.2	WBGene00010357	H03A11.2	c.3081G>A	p.Lys1027Lys	32.32
V	8633529	G	A	missense_variant	MODERATE	oac-29	WBGene00018295	F41E6.14	c.872C>T	p.Ser291Phe	32.24
V	8963428	C	G	missense_variant	MODERATE	nhr-44	WBGene00003634	T19A5.4	c.435G>C	p.Lys145Asn	32.21
III	2253925	A	T	missense_variant&splice_region_variant	MODERATE	fbxa-73	WBGene00020640	T20H9.4	c.91A>T	p.Met31Leu	32.15
IV	10950293	A	C	missense_variant	MODERATE	Y69E1A.2	WBGene00013474	Y69E1A.2	c.368A>C	p.Lys123Thr	32.13
IV	10950294	G	A	synonymous_variant	LOW	Y69E1A.2	WBGene00013474	Y69E1A.2	c.369G>A	p.Lys123Lys	32.13
IV	14798385	C	T	synonymous_variant	LOW	arl-8	WBGene00000192	Y57G11C.13	c.159C>T	p.Val53Val	32.13
II	229875	T	C	missense_variant	MODERATE	Y43H11AL.1	WBGene00021545	Y43H11AL.1b.1	c.733A>G	p.Lys245Glu	31.97
II	229875	T	C	missense_variant	MODERATE	Y43H11AL.1	WBGene00021545	Y43H11AL.1c	c.691A>G	p.Lys231Glu	31.97
II	229875	T	C	missense_variant	MODERATE	Y43H11AL.1	WBGene00021545	Y43H11AL.1b.2	c.733A>G	p.Lys245Glu	31.97
II	229875	T	C	missense_variant	MODERATE	Y43H11AL.1	WBGene00021545	Y43H11AL.1a.1	c.733A>G	p.Lys245Glu	31.97
II	229875	T	C	missense_variant	MODERATE	Y43H11AL.1	WBGene00021545	Y43H11AL.1a.2	c.733A>G	p.Lys245Glu	31.97
V	3216744	C	T	synonymous_variant	LOW	apx-1	WBGene00000168	K08D9.3	c.825C>T	p.Val275Val	31.95
V	5084663	A	G	synonymous_variant	LOW	Y58A7A.4	WBGene00021978	Y58A7A.4	c.297T>C	p.Asp99Asp	31.78
II	8068182	G	A	splice_region_variant	LOW	pdha-1	WBGene00011510	T05H10.6b	c.*377G>A		31.69
II	8068182	G	A	splice_region_variant	LOW	pdha-1	WBGene00011510	T05H10.6a.3	c.*377G>A		31.69
II	8068182	G	A	splice_region_variant	LOW	pdha-1	WBGene00011510	T05H10.6a.1	c.*377G>A		31.69
II	8068182	G	A	splice_region_variant	LOW	pdha-1	WBGene00011510	T05H10.6a.2	c.*377G>A		31.69
V	5084681	A	G	synonymous_variant	LOW	Y58A7A.4	WBGene00021978	Y58A7A.4	c.279T>C	p.Ile93Ile	31.65
II	9105427	A	C	missense_variant	MODERATE	T24H10.5	WBGene00012003	T24H10.5	c.1242A>C	p.Glu414Asp	31.45
IV	7596427	A	T	missense_variant	MODERATE	tag-80	WBGene00018468	F45E4.3a	c.6728A>T	p.Tyr2243Phe	31.39
IV	7596427	A	T	missense_variant	MODERATE	tag-80	WBGene00018468	F45E4.3b	c.6728A>T	p.Tyr2243Phe	31.39
X	12341341	C	A	missense_variant	MODERATE	zig-2	WBGene00006979	F42F12.2	c.43G>T	p.Ala15Ser	31.34
V	5084642	C	T	synonymous_variant	LOW	Y58A7A.4	WBGene00021978	Y58A7A.4	c.318G>A	p.Val106Val	31.33
V	6406771	C	A	missense_variant	MODERATE	F57F4.4	WBGene00019017	F57F4.4	c.1171G>T	p.Asp391Tyr	31.28
II	1603322	C	T	missense_variant	MODERATE	bath-47	WBGene00006464	T07H3.1	c.1250C>T	p.Ala417Val	31.22
IV	7591643	A	C	missense_variant	MODERATE	tag-80	WBGene00018468	F45E4.3a	c.1944A>C	p.Glu648Asp	31.22
IV	7591643	A	C	missense_variant	MODERATE	tag-80	WBGene00018468	F45E4.3b	c.1944A>C	p.Glu648Asp	31.22
V	10457168	C	G	missense_variant	MODERATE	F22E12.1	WBGene00009058	F22E12.1	c.155G>C	p.Arg52Pro	31.04
IV	7596492	G	T	missense_variant	MODERATE	tag-80	WBGene00018468	F45E4.3a	c.6793G>T	p.Val2265Leu	30.97
IV	7596492	G	T	missense_variant	MODERATE	tag-80	WBGene00018468	F45E4.3b	c.6793G>T	p.Val2265Leu	30.97
IV	10735905	C	A	missense_variant	MODERATE	cyb-1	WBGene00000865	ZC168.4.1	c.408C>A	p.Phe136Leu	30.95
IV	10735905	C	A	missense_variant	MODERATE	cyb-1	WBGene00000865	ZC168.4.2	c.408C>A	p.Phe136Leu	30.95
IV	10735905	C	A	missense_variant	MODERATE	cyb-1	WBGene00000865	ZC168.4.3	c.408C>A	p.Phe136Leu	30.95
III	8976491	C	T	missense_variant&splice_region_variant	MODERATE	pde-2	WBGene00011146	R08D7.6a	c.2072G>A	p.Arg691Lys	30.9
III	8976491	C	T	missense_variant&splice_region_variant	MODERATE	pde-2	WBGene00011146	R08D7.6b	c.2063G>A	p.Arg688Lys	30.9
IV	15712902	T	G	synonymous_variant	LOW	Y105C5A.15	WBGene00013639	Y105C5A.15c	c.393T>G	p.Thr131Thr	30.89
IV	15712902	T	G	synonymous_variant	LOW	Y105C5A.15	WBGene00013639	Y105C5A.15e	c.393T>G	p.Thr131Thr	30.89
IV	15712902	T	G	synonymous_variant	LOW	Y105C5A.15	WBGene00013639	Y105C5A.15a	c.111T>G	p.Thr37Thr	30.89
IV	15712902	T	G	synonymous_variant	LOW	Y105C5A.15	WBGene00013639	Y105C5A.15b	c.111T>G	p.Thr37Thr	30.89
I	12471097	C	G	missense_variant	MODERATE	T27F6.1	WBGene00012102	T27F6.1	c.1183G>C	p.Glu395Gln	30.7
V	5084669	T	C	synonymous_variant	LOW	Y58A7A.4	WBGene00021978	Y58A7A.4	c.291A>G	p.Thr97Thr	30.69
IV	783851	G	A	synonymous_variant	LOW	ugt-52	WBGene00018931	F56B3.7	c.1356G>A	p.Arg452Arg	30.67
MtDNA	12998	C	T	synonymous_variant	LOW	nduo-5	WBGene00010967	MTCE.35	c.1308C>T	p.Gly436Gly	30.67
V	5084654	C	A	missense_variant	MODERATE	Y58A7A.4	WBGene00021978	Y58A7A.4	c.306G>T	p.Lys102Asn	30.57
V	5084684	T	A	synonymous_variant	LOW	Y58A7A.4	WBGene00021978	Y58A7A.4	c.276A>T	p.Arg92Arg	30.43
III	9677390	C	T	synonymous_variant	LOW	ugt-60	WBGene00007402	C07A9.6	c.1017G>A	p.Arg339Arg	30.13
II	6759972	C	G	missense_variant	MODERATE	F41G3.2	WBGene00018299	F41G3.2	c.569C>G	p.Pro190Arg	30.08
III	9918846	C	G	synonymous_variant	LOW	F40F12.3	WBGene00009592	F40F12.3	c.756G>C	p.Gly252Gly	29.83
II	8185828	A	T	missense_variant	MODERATE	cct-1	WBGene00000377	T05C12.7	c.339A>T	p.Lys113Asn	29.77
III	1879552	T	G	missense_variant	MODERATE	smi-1	WBGene00004886	Y39A3CR.1a	c.479T>G	p.Phe160Cys	29.75
III	1879552	T	G	missense_variant	MODERATE	smi-1	WBGene00004886	Y39A3CR.1b	c.170T>G	p.Phe57Cys	29.75
X	2192531	T	C	missense_variant	MODERATE	gap-1	WBGene00001515	T24C12.2	c.28T>C	p.Cys10Arg	29.69
III	10907944	C	T	stop_gained	HIGH	unc-119	WBGene00006843	M142.1c	c.412C>T	p.Arg138*	29.67
III	10907944	C	T	stop_gained	HIGH	unc-119	WBGene00006843	M142.1a	c.337C>T	p.Arg113*	29.67
III	10907944	C	T	stop_gained	HIGH	unc-119	WBGene00006843	M142.1b	c.277C>T	p.Arg93*	29.67
X	8814726	T	G	synonymous_variant	LOW	R04E5.2	WBGene00019869	R04E5.2	c.1017T>G	p.Ser339Ser	29.61
V	7403446	A	G	synonymous_variant	LOW	srj-13	WBGene00005601	R13D7.3	c.585A>G	p.Glu195Glu	29.55
V	5084806	C	A	missense_variant	MODERATE	Y58A7A.4	WBGene00021978	Y58A7A.4	c.202G>T	p.Ala68Ser	29.5
III	8693701	G	C	missense_variant	MODERATE	B0303.7	WBGene00015128	B0303.7a	c.47G>C	p.Cys16Ser	29.47
X	3502807	C	T	missense_variant	MODERATE	C12D12.1	WBGene00015713	C12D12.1c	c.620C>T	p.Thr207Ile	29.33
X	3502807	C	T	missense_variant	MODERATE	C12D12.1	WBGene00015713	C12D12.1b	c.620C>T	p.Thr207Ile	29.33
X	3502807	C	T	missense_variant	MODERATE	C12D12.1	WBGene00015713	C12D12.1a	c.620C>T	p.Thr207Ile	29.33
II	4735861	G	A	missense_variant	MODERATE	F41C3.6	WBGene00018272	F41C3.6	c.502G>A	p.Gly168Arg	29.25
II	3551208	G	A	missense_variant&splice_region_variant	MODERATE	W10G11.19	WBGene00021148	W10G11.19	c.217G>A	p.Glu73Lys	29.21
IV	10950015	C	T	synonymous_variant	LOW	Y69E1A.2	WBGene00013474	Y69E1A.2	c.138C>T	p.His46His	29.18
V	5084650	T	C	missense_variant	MODERATE	Y58A7A.4	WBGene00021978	Y58A7A.4	c.310A>G	p.Asn104Asp	29.18
V	15766903	C	G	stop_gained	HIGH	F57A10.2	WBGene00010184	F57A10.2	c.230C>G	p.Ser77*	29.04
V	8757777	T	G	missense_variant	MODERATE	B0507.7	WBGene00015224	B0507.7	c.449A>C	p.Asn150Thr	29.03
I	10272518	A	T	synonymous_variant	LOW	ZC247.1	WBGene00013859	ZC247.1	c.5433T>A	p.Pro1811Pro	28.94
I	10272522	T	A	missense_variant	MODERATE	ZC247.1	WBGene00013859	ZC247.1	c.5429A>T	p.Gln1810Leu	28.94
V	5084757	G	A	missense_variant	MODERATE	Y58A7A.4	WBGene00021978	Y58A7A.4	c.251C>T	p.Pro84Leu	28.93
X	3812013	T	G	synonymous_variant	LOW	F35A5.1	WBGene00018024	F35A5.1	c.4548T>G	p.Pro1516Pro	28.88
X	15748072	C	G	missense_variant	MODERATE	ZK678.t2	WBGene00014627	ZK678.t2	c.42C>G	p.Asp14Glu	28.75
III	12953329	T	G	missense_variant	MODERATE	ttm-1	WBGene00012712	Y39E4A.2b	c.1109A>C	p.Asn370Thr	28.72
III	12953329	T	G	missense_variant	MODERATE	ttm-1	WBGene00012712	Y39E4A.2c	c.878A>C	p.Asn293Thr	28.72
III	12953329	T	G	missense_variant	MODERATE	ttm-1	WBGene00012712	Y39E4A.2a	c.1052A>C	p.Asn351Thr	28.72
X	3812028	T	G	missense_variant	MODERATE	F35A5.1	WBGene00018024	F35A5.1	c.4563T>G	p.Ser1521Arg	28.65
IV	7597783	T	A	missense_variant	MODERATE	tag-80	WBGene00018468	F45E4.3a	c.8017T>A	p.Cys2673Ser	28.61
IV	7597783	T	A	missense_variant	MODERATE	tag-80	WBGene00018468	F45E4.3b	c.8017T>A	p.Cys2673Ser	28.61
V	19029747	G	A	missense_variant	MODERATE	Y39B6A.25	WBGene00012684	Y39B6A.25	c.1153G>A	p.Gly385Arg	28.61
III	8693705	G	A	synonymous_variant	LOW	B0303.7	WBGene00015128	B0303.7a	c.51G>A	p.Gly17Gly	28.6
V	19828988	T	C	synonymous_variant	LOW	pcp-4	WBGene00003959	Y116F11B.3	c.684A>G	p.Gln228Gln	28.54
IV	10950006	A	G	synonymous_variant	LOW	Y69E1A.2	WBGene00013474	Y69E1A.2	c.129A>G	p.Lys43Lys	28.52
III	9588882	C	T	missense_variant	MODERATE	acox-5	WBGene00008167	C48B4.1	c.1093G>A	p.Glu365Lys	28.47
X	3812027	G	C	missense_variant	MODERATE	F35A5.1	WBGene00018024	F35A5.1	c.4562G>C	p.Ser1521Thr	28.32
V	6178476	A	T	missense_variant	MODERATE	ttn-1	WBGene00006436	W06H8.8g	c.18660T>A	p.His6220Gln	28.31
V	6178476	A	T	missense_variant	MODERATE	ttn-1	WBGene00006436	W06H8.8e.2	c.18660T>A	p.His6220Gln	28.31
V	6178476	A	T	missense_variant	MODERATE	ttn-1	WBGene00006436	W06H8.8f.2	c.18660T>A	p.His6220Gln	28.31
V	6178476	A	T	missense_variant	MODERATE	ttn-1	WBGene00006436	W06H8.8e.1	c.18660T>A	p.His6220Gln	28.31
V	6178476	A	T	missense_variant	MODERATE	ttn-1	WBGene00006436	W06H8.8f.1	c.18660T>A	p.His6220Gln	28.31
V	6178476	A	T	missense_variant	MODERATE	ttn-1	WBGene00006436	W06H8.8d	c.18600T>A	p.His6200Gln	28.31
I	4765802	G	T	stop_gained	HIGH	M04F3.2	WBGene00019768	M04F3.2	c.49G>T	p.Glu17*	28.09
X	15748074	A	G	missense_variant	MODERATE	ZK678.t2	WBGene00014627	ZK678.t2	c.44A>G	p.Lys15Arg	27.93
X	3812034	A	T	synonymous_variant	LOW	F35A5.1	WBGene00018024	F35A5.1	c.4569A>T	p.Thr1523Thr	27.9
V	18941877	A	C	missense_variant	MODERATE	Y80D3A.8	WBGene00013586	Y80D3A.8	c.779A>C	p.Glu260Ala	27.89
X	85345	A	C	missense_variant&splice_region_variant	MODERATE	Y73B3A.3	WBGene00022205	Y73B3A.3	c.1466T>G	p.Leu489Arg	27.85
II	6721812	A	C	stop_lost	HIGH	T14B4.t1	WBGene00023138	T14B4.t1	c.47A>C	p.Ter16Serext*?	27.42
II	6759977	C	G	missense_variant	MODERATE	F41G3.2	WBGene00018299	F41G3.2	c.574C>G	p.Arg192Gly	27.4
X	85332	T	A	missense_variant	MODERATE	Y73B3A.3	WBGene00022205	Y73B3A.3	c.1479A>T	p.Glu493Asp	27.4
IV	7597770	G	A	synonymous_variant	LOW	tag-80	WBGene00018468	F45E4.3a	c.8004G>A	p.Pro2668Pro	27.36
IV	7597770	G	A	synonymous_variant	LOW	tag-80	WBGene00018468	F45E4.3b	c.8004G>A	p.Pro2668Pro	27.36
III	3650272	G	A	missense_variant	MODERATE	madf-8	WBGene00008118	C46F11.3	c.152C>T	p.Thr51Ile	27.32
III	9889523	C	T	missense_variant	MODERATE	alg-4	WBGene00006449	ZK757.3a.1	c.1228G>A	p.Ala410Thr	27.32
III	9889523	C	T	missense_variant	MODERATE	alg-4	WBGene00006449	ZK757.3b	c.1219G>A	p.Ala407Thr	27.32
III	9889523	C	T	missense_variant	MODERATE	alg-4	WBGene00006449	ZK757.3a.2	c.1228G>A	p.Ala410Thr	27.32
II	7200976	C	T	synonymous_variant	LOW	E04F6.2	WBGene00017122	E04F6.2	c.207C>T	p.Ser69Ser	27.11
IV	13157706	C	A	synonymous_variant	LOW	msh-5	WBGene00003421	F09E8.3a	c.1281C>A	p.Val427Val	26.99
II	6470161	C	A	synonymous_variant	LOW	T28D9.12	WBGene00044669	T28D9.12	c.162G>T	p.Ser54Ser	26.98
IV	11405088	A	G	missense_variant	MODERATE	cyp-31A2	WBGene00010354	H02I12.8	c.934A>G	p.Ile312Val	26.93
IV	10950126	A	T	synonymous_variant	LOW	Y69E1A.2	WBGene00013474	Y69E1A.2	c.249A>T	p.Val83Val	26.85
II	6759980	A	G	missense_variant	MODERATE	F41G3.2	WBGene00018299	F41G3.2	c.577A>G	p.Asn193Asp	26.64
IV	7596309	A	C	missense_variant	MODERATE	tag-80	WBGene00018468	F45E4.3a	c.6610A>C	p.Thr2204Pro	26.64
IV	7596309	A	C	missense_variant	MODERATE	tag-80	WBGene00018468	F45E4.3b	c.6610A>C	p.Thr2204Pro	26.64
I	238168	G	A	synonymous_variant	LOW	Y48G1BM.6	WBGene00021671	Y48G1BM.6	c.85C>T	p.Leu29Leu	26.52
IV	10950941	A	G	synonymous_variant	LOW	Y69E1A.2	WBGene00013474	Y69E1A.2	c.966A>G	p.Ala322Ala	26.24
V	8757776	G	T	missense_variant	MODERATE	B0507.7	WBGene00015224	B0507.7	c.450C>A	p.Asn150Lys	26.23
I	238154	C	T	synonymous_variant	LOW	Y48G1BM.6	WBGene00021671	Y48G1BM.6	c.99G>A	p.Thr33Thr	26.08
I	238090	C	T	missense_variant	MODERATE	Y48G1BM.6	WBGene00021671	Y48G1BM.6	c.163G>A	p.Ala55Thr	26.06
I	238091	C	T	synonymous_variant	LOW	Y48G1BM.6	WBGene00021671	Y48G1BM.6	c.162G>A	p.Ala54Ala	26.06
II	2849019	C	T	missense_variant	MODERATE	ptc-3	WBGene00004210	Y110A2AL.8c	c.1798G>A	p.Glu600Lys	26.06
II	2849019	C	T	missense_variant	MODERATE	ptc-3	WBGene00004210	Y110A2AL.8a	c.1771G>A	p.Glu591Lys	26.06
II	2849019	C	T	missense_variant	MODERATE	ptc-3	WBGene00004210	Y110A2AL.8b	c.1771G>A	p.Glu591Lys	26.06
II	5974583	C	T	synonymous_variant	LOW	B0034.5	WBGene00015005	B0034.5	c.312G>A	p.Lys104Lys	26.04
X	3812044	G	A	missense_variant	MODERATE	F35A5.1	WBGene00018024	F35A5.1	c.4579G>A	p.Glu1527Lys	25.89
MtDNA	1897	G	A	missense_variant	MODERATE	nduo-1	WBGene00010959	MTCE.11	c.135G>A	p.Met45Ile	25.88
IV	10949934	A	C	synonymous_variant	LOW	Y69E1A.2	WBGene00013474	Y69E1A.2	c.57A>C	p.Pro19Pro	25.79
I	238087	T	C	missense_variant	MODERATE	Y48G1BM.6	WBGene00021671	Y48G1BM.6	c.166A>G	p.Thr56Ala	25.74
IV	10949928	A	G	synonymous_variant	LOW	Y69E1A.2	WBGene00013474	Y69E1A.2	c.51A>G	p.Gly17Gly	25.74
IV	10949930	C	T	missense_variant	MODERATE	Y69E1A.2	WBGene00013474	Y69E1A.2	c.53C>T	p.Ala18Val	25.74
I	4530052	T	A	splice_region_variant&intron_variant	LOW	bet-1	WBGene00022473	Y119C1B.8a	c.1897+8A>T		25.71
I	4530052	T	A	splice_region_variant&intron_variant	LOW	bet-1	WBGene00022473	Y119C1B.8b	c.1897+8A>T		25.71
III	11029199	C	T	missense_variant	MODERATE	Y48A6B.8	WBGene00012969	Y48A6B.8	c.193G>A	p.Glu65Lys	25.7
I	238081	A	T	missense_variant	MODERATE	Y48G1BM.6	WBGene00021671	Y48G1BM.6	c.172T>A	p.Phe58Ile	25.69
X	3812048	A	C	missense_variant	MODERATE	F35A5.1	WBGene00018024	F35A5.1	c.4583A>C	p.Asp1528Ala	25.54
I	238106	C	T	synonymous_variant	LOW	Y48G1BM.6	WBGene00021671	Y48G1BM.6	c.147G>A	p.Arg49Arg	25.28
X	3812054	C	A	missense_variant	MODERATE	F35A5.1	WBGene00018024	F35A5.1	c.4589C>A	p.Pro1530Gln	25.17
II	6759973	G	A	synonymous_variant	LOW	F41G3.2	WBGene00018299	F41G3.2	c.570G>A	p.Pro190Pro	25.1
IV	7591680	T	A	missense_variant	MODERATE	tag-80	WBGene00018468	F45E4.3a	c.1981T>A	p.Cys661Ser	24.98
IV	7591680	T	A	missense_variant	MODERATE	tag-80	WBGene00018468	F45E4.3b	c.1981T>A	p.Cys661Ser	24.98
I	10271396	G	A	synonymous_variant	LOW	ZC247.1	WBGene00013859	ZC247.1	c.6555C>T	p.Ser2185Ser	24.95
IV	7598905	A	G	missense_variant	MODERATE	tag-80	WBGene00018468	F45E4.3a	c.9139A>G	p.Ile3047Val	24.55
IV	7598905	A	G	missense_variant	MODERATE	tag-80	WBGene00018468	F45E4.3b	c.9139A>G	p.Ile3047Val	24.55
IV	7598906	T	A	missense_variant	MODERATE	tag-80	WBGene00018468	F45E4.3a	c.9140T>A	p.Ile3047Lys	24.55
IV	7598906	T	A	missense_variant	MODERATE	tag-80	WBGene00018468	F45E4.3b	c.9140T>A	p.Ile3047Lys	24.55
I	238077	T	G	missense_variant	MODERATE	Y48G1BM.6	WBGene00021671	Y48G1BM.6	c.176A>C	p.Lys59Thr	24.52
X	15748050	T	A	missense_variant	MODERATE	ZK678.t2	WBGene00014627	ZK678.t2	c.20T>A	p.Phe7Tyr	24.41
IV	10950432	G	A	synonymous_variant	LOW	Y69E1A.2	WBGene00013474	Y69E1A.2	c.507G>A	p.Gly169Gly	24.38
I	4765810	C	G	missense_variant	MODERATE	M04F3.2	WBGene00019768	M04F3.2	c.57C>G	p.Cys19Trp	24.2
IV	11100234	A	C	stop_gained	HIGH	str-3	WBGene00006071	M7.13	c.138T>G	p.Tyr46*	24.1
I	238080	A	C	missense_variant	MODERATE	Y48G1BM.6	WBGene00021671	Y48G1BM.6	c.173T>G	p.Phe58Cys	24.01
II	2036313	G	T	missense_variant	MODERATE	bath-19	WBGene00019132	F59H6.1	c.838C>A	p.Leu280Ile	23.93
II	9169079	C	T	missense_variant	MODERATE	T23G7.2	WBGene00011965	T23G7.2a.1	c.457G>A	p.Ala153Thr	23.86
II	9169079	C	T	missense_variant	MODERATE	T23G7.2	WBGene00011965	T23G7.2a.2	c.457G>A	p.Ala153Thr	23.86
III	3387045	T	C	missense_variant	MODERATE	C56G7.2	WBGene00008347	C56G7.2	c.968A>G	p.Asn323Ser	23.83
I	238058	A	G	splice_donor_variant&intron_variant	HIGH	Y48G1BM.6	WBGene00021671	Y48G1BM.6	c.193+2T>C		23.18
II	3833581	A	G	missense_variant	MODERATE	oac-4	WBGene00015873	C17A2.5	c.1919T>C	p.Leu640Ser	22.8
MtDNA	8429	A	G	synonymous_variant	LOW	ctc-1	WBGene00010964	MTCE.26	c.585A>G	p.Val195Val	22.74
II	3833579	C	A	missense_variant	MODERATE	oac-4	WBGene00015873	C17A2.5	c.1921G>T	p.Val641Leu	22.68
II	3833570	T	C	missense_variant&splice_region_variant	MODERATE	oac-4	WBGene00015873	C17A2.5	c.1930A>G	p.Asn644Asp	22.56
II	3833587	G	A	missense_variant	MODERATE	oac-4	WBGene00015873	C17A2.5	c.1913C>T	p.Ala638Val	22.42
I	238055	G	C	splice_region_variant&intron_variant	LOW	Y48G1BM.6	WBGene00021671	Y48G1BM.6	c.193+5C>G		22.4
II	3833577	T	C	synonymous_variant	LOW	oac-4	WBGene00015873	C17A2.5	c.1923A>G	p.Val641Val	22.31
II	3833561	A	C	splice_region_variant&intron_variant	LOW	oac-4	WBGene00015873	C17A2.5	c.1932+7T>G		22.29
II	3833586	T	C	synonymous_variant	LOW	oac-4	WBGene00015873	C17A2.5	c.1914A>G	p.Ala638Ala	21.94
X	3812075	C	T	missense_variant	MODERATE	F35A5.1	WBGene00018024	F35A5.1	c.4610C>T	p.Ala1537Val	21.6
II	12606079	C	G	missense_variant	MODERATE	lips-15	WBGene00012585	Y38E10A.7	c.104C>G	p.Ala35Gly	21.36
I	4765814	A	G	missense_variant	MODERATE	M04F3.2	WBGene00019768	M04F3.2	c.61A>G	p.Thr21Ala	21.18
I	10275824	C	G	synonymous_variant	LOW	ZC247.1	WBGene00013859	ZC247.1	c.2127G>C	p.Ser709Ser	21.18
II	12606075	T	A	missense_variant	MODERATE	lips-15	WBGene00012585	Y38E10A.7	c.100T>A	p.Ser34Thr	21.01
II	12606342	G	A	missense_variant	MODERATE	lips-15	WBGene00012585	Y38E10A.7	c.319G>A	p.Val107Ile	21.01
II	12606343	T	A	missense_variant	MODERATE	lips-15	WBGene00012585	Y38E10A.7	c.320T>A	p.Val107Asp	21.01
II	12606344	T	C	synonymous_variant	LOW	lips-15	WBGene00012585	Y38E10A.7	c.321T>C	p.Val107Val	20.58
II	3833913	A	T	missense_variant	MODERATE	oac-4	WBGene00015873	C17A2.5	c.1627T>A	p.Phe543Ile	20.45
X	9460253	A	C	missense_variant	MODERATE	ZK899.5	WBGene00014143	ZK899.5	c.585T>G	p.Asp195Glu	20.23
II	3834862	T	G	missense_variant	MODERATE	oac-4	WBGene00015873	C17A2.5	c.973A>C	p.Ile325Leu	19.64
X	3812085	A	T	synonymous_variant	LOW	F35A5.1	WBGene00018024	F35A5.1	c.4620A>T	p.Pro1540Pro	19.52
II	12606145	A	C	missense_variant	MODERATE	lips-15	WBGene00012585	Y38E10A.7	c.170A>C	p.Asp57Ala	19.36
IV	7591619	C	T	synonymous_variant	LOW	tag-80	WBGene00018468	F45E4.3a	c.1920C>T	p.Asp640Asp	19.25
IV	7591619	C	T	synonymous_variant	LOW	tag-80	WBGene00018468	F45E4.3b	c.1920C>T	p.Asp640Asp	19.25
II	3106582	C	G	missense_variant	MODERATE	clec-122	WBGene00021290	Y25C1A.3	c.518C>G	p.Ala173Gly	19.23
I	10270583	C	T	synonymous_variant	LOW	ZC247.1	WBGene00013859	ZC247.1	c.7368G>A	p.Lys2456Lys	19.21
I	238211	A	G	synonymous_variant	LOW	Y48G1BM.6	WBGene00021671	Y48G1BM.6	c.42T>C	p.Phe14Phe	19.18
II	12606144	G	A	missense_variant	MODERATE	lips-15	WBGene00012585	Y38E10A.7	c.169G>A	p.Asp57Asn	18.98
II	12606350	G	A	synonymous_variant	LOW	lips-15	WBGene00012585	Y38E10A.7	c.327G>A	p.Thr109Thr	18.94
II	12606352	C	T	missense_variant	MODERATE	lips-15	WBGene00012585	Y38E10A.7	c.329C>T	p.Ala110Val	18.94
II	12606134	G	A	synonymous_variant	LOW	lips-15	WBGene00012585	Y38E10A.7	c.159G>A	p.Gly53Gly	18.86
II	3833724	A	G	synonymous_variant	LOW	oac-4	WBGene00015873	C17A2.5	c.1776T>C	p.Asp592Asp	18.79
II	12606581	T	A	synonymous_variant	LOW	lips-15	WBGene00012585	Y38E10A.7	c.558T>A	p.Gly186Gly	18.67
II	12606582	A	T	missense_variant	MODERATE	lips-15	WBGene00012585	Y38E10A.7	c.559A>T	p.Thr187Ser	18.67
IV	7593177	A	C	missense_variant	MODERATE	tag-80	WBGene00018468	F45E4.3a	c.3478A>C	p.Lys1160Gln	18.62
IV	7593177	A	C	missense_variant	MODERATE	tag-80	WBGene00018468	F45E4.3b	c.3478A>C	p.Lys1160Gln	18.62
II	3833996	C	T	synonymous_variant	LOW	oac-4	WBGene00015873	C17A2.5	c.1593G>A	p.Leu531Leu	18.6
II	3833998	G	A	synonymous_variant	LOW	oac-4	WBGene00015873	C17A2.5	c.1591C>T	p.Leu531Leu	18.6
V	6179574	C	A	synonymous_variant	LOW	ttn-1	WBGene00006436	W06H8.8g	c.17562G>T	p.Val5854Val	18.48
V	6179574	C	A	synonymous_variant	LOW	ttn-1	WBGene00006436	W06H8.8e.2	c.17562G>T	p.Val5854Val	18.48
V	6179574	C	A	synonymous_variant	LOW	ttn-1	WBGene00006436	W06H8.8f.2	c.17562G>T	p.Val5854Val	18.48
V	6179574	C	A	synonymous_variant	LOW	ttn-1	WBGene00006436	W06H8.8e.1	c.17562G>T	p.Val5854Val	18.48
V	6179574	C	A	synonymous_variant	LOW	ttn-1	WBGene00006436	W06H8.8f.1	c.17562G>T	p.Val5854Val	18.48
V	6179574	C	A	synonymous_variant	LOW	ttn-1	WBGene00006436	W06H8.8d	c.17502G>T	p.Val5834Val	18.48
I	238244	T	A	missense_variant	MODERATE	Y48G1BM.6	WBGene00021671	Y48G1BM.6	c.9A>T	p.Leu3Phe	18.41
II	12606137	A	G	synonymous_variant	LOW	lips-15	WBGene00012585	Y38E10A.7	c.162A>G	p.Gly54Gly	18.21
II	12606222	G	A	missense_variant	MODERATE	lips-15	WBGene00012585	Y38E10A.7	c.199G>A	p.Val67Ile	18.01
I	10269046	A	C	missense_variant	MODERATE	ZC247.1	WBGene00013859	ZC247.1	c.8905T>G	p.Phe2969Val	17.97
II	3833907	G	C	missense_variant	MODERATE	oac-4	WBGene00015873	C17A2.5	c.1633C>G	p.Arg545Gly	17.86
X	3304541	A	G	missense_variant	MODERATE	F11D5.7	WBGene00043980	F11D5.7	c.111A>G	p.Ile37Met	17.86
X	3304547	G	A	synonymous_variant	LOW	F11D5.7	WBGene00043980	F11D5.7	c.117G>A	p.Glu39Glu	17.86
V	6174160	G	C	missense_variant	MODERATE	ttn-1	WBGene00006436	W06H8.8g	c.22976C>G	p.Ala7659Gly	17.8
V	6174160	G	C	missense_variant	MODERATE	ttn-1	WBGene00006436	W06H8.8e.2	c.22976C>G	p.Ala7659Gly	17.8
V	6174160	G	C	missense_variant	MODERATE	ttn-1	WBGene00006436	W06H8.8f.2	c.22976C>G	p.Ala7659Gly	17.8
V	6174160	G	C	missense_variant	MODERATE	ttn-1	WBGene00006436	W06H8.8e.1	c.22976C>G	p.Ala7659Gly	17.8
V	6174160	G	C	missense_variant	MODERATE	ttn-1	WBGene00006436	W06H8.8f.1	c.22976C>G	p.Ala7659Gly	17.8
V	6174160	G	C	missense_variant	MODERATE	ttn-1	WBGene00006436	W06H8.8d	c.22916C>G	p.Ala7639Gly	17.8
II	3833599	G	A	missense_variant	MODERATE	oac-4	WBGene00015873	C17A2.5	c.1901C>T	p.Ala634Val	17.79
I	232066	C	A	missense_variant	MODERATE	Y48G1BM.6	WBGene00021671	Y48G1BM.6	c.3406G>T	p.Ala1136Ser	17.71
II	12606225	A	G	missense_variant	MODERATE	lips-15	WBGene00012585	Y38E10A.7	c.202A>G	p.Ile68Val	17.52
II	3833471	C	A	missense_variant	MODERATE	oac-4	WBGene00015873	C17A2.5	c.1975G>T	p.Ala659Ser	17.27
IV	7591706	A	G	synonymous_variant	LOW	tag-80	WBGene00018468	F45E4.3a	c.2007A>G	p.Lys669Lys	17.23
IV	7591706	A	G	synonymous_variant	LOW	tag-80	WBGene00018468	F45E4.3b	c.2007A>G	p.Lys669Lys	17.23
X	3304556	C	T	synonymous_variant	LOW	F11D5.7	WBGene00043980	F11D5.7	c.126C>T	p.Asn42Asn	17.23
X	3304562	T	C	synonymous_variant	LOW	F11D5.7	WBGene00043980	F11D5.7	c.132T>C	p.Thr44Thr	17.23
II	3833976	T	A	splice_region_variant&intron_variant	LOW	oac-4	WBGene00015873	C17A2.5	c.1609+4A>T		17.09
II	12606209	A	T	splice_region_variant&intron_variant	LOW	lips-15	WBGene00012585	Y38E10A.7	c.189-3A>T		16.86
II	3833745	T	C	synonymous_variant	LOW	oac-4	WBGene00015873	C17A2.5	c.1755A>G	p.Thr585Thr	16.85
II	3833747	T	C	missense_variant	MODERATE	oac-4	WBGene00015873	C17A2.5	c.1753A>G	p.Thr585Ala	16.85
V	6174145	T	A	missense_variant	MODERATE	ttn-1	WBGene00006436	W06H8.8g	c.22991A>T	p.Glu7664Val	16.76
V	6174145	T	A	missense_variant	MODERATE	ttn-1	WBGene00006436	W06H8.8e.2	c.22991A>T	p.Glu7664Val	16.76
V	6174145	T	A	missense_variant	MODERATE	ttn-1	WBGene00006436	W06H8.8f.2	c.22991A>T	p.Glu7664Val	16.76
V	6174145	T	A	missense_variant	MODERATE	ttn-1	WBGene00006436	W06H8.8e.1	c.22991A>T	p.Glu7664Val	16.76
V	6174145	T	A	missense_variant	MODERATE	ttn-1	WBGene00006436	W06H8.8f.1	c.22991A>T	p.Glu7664Val	16.76
V	6174145	T	A	missense_variant	MODERATE	ttn-1	WBGene00006436	W06H8.8d	c.22931A>T	p.Glu7644Val	16.76
X	3304565	A	G	synonymous_variant	LOW	F11D5.7	WBGene00043980	F11D5.7	c.135A>G	p.Leu45Leu	16.64
X	3304570	C	A	missense_variant	MODERATE	F11D5.7	WBGene00043980	F11D5.7	c.140C>A	p.Thr47Asn	16.64
X	3304574	C	T	synonymous_variant	LOW	F11D5.7	WBGene00043980	F11D5.7	c.144C>T	p.His48His	16.64
II	12606021	G	A	missense_variant	MODERATE	lips-15	WBGene00012585	Y38E10A.7	c.46G>A	p.Ala16Thr	16.58
I	232000	A	G	missense_variant	MODERATE	Y48G1BM.6	WBGene00021671	Y48G1BM.6	c.3472T>C	p.Tyr1158His	16.34
II	3833355	C	T	missense_variant	MODERATE	oac-4	WBGene00015873	C17A2.5	c.2091G>A	p.Met697Ile	16.13
X	3304568	T	C	synonymous_variant	LOW	F11D5.7	WBGene00043980	F11D5.7	c.138T>C	p.Ser46Ser	16.08
II	3833289	T	G	missense_variant	MODERATE	oac-4	WBGene00015873	C17A2.5	c.2157A>C	p.Gln719His	16.06
II	12606267	C	A	missense_variant	MODERATE	lips-15	WBGene00012585	Y38E10A.7	c.244C>A	p.Pro82Thr	15.9
II	3833749	G	A	missense_variant	MODERATE	oac-4	WBGene00015873	C17A2.5	c.1751C>T	p.Thr584Ile	15.88
IV	16788371	G	T	missense_variant	MODERATE	Y43D4A.6	WBGene00012792	Y43D4A.6	c.848G>T	p.Arg283Leu	15.84
IV	16788372	T	C	synonymous_variant	LOW	Y43D4A.6	WBGene00012792	Y43D4A.6	c.849T>C	p.Arg283Arg	15.84
IV	16788373	A	C	synonymous_variant	LOW	Y43D4A.6	WBGene00012792	Y43D4A.6	c.850A>C	p.Arg284Arg	15.84
IV	11144577	A	T	synonymous_variant	LOW	F01G4.4	WBGene00008503	F01G4.4b	c.1035A>T	p.Pro345Pro	15.81
IV	11144577	A	T	synonymous_variant	LOW	F01G4.4	WBGene00008503	F01G4.4a	c.1035A>T	p.Pro345Pro	15.81
II	3833348	C	T	missense_variant	MODERATE	oac-4	WBGene00015873	C17A2.5	c.2098G>A	p.Glu700Lys	15.8
II	3833330	A	T	missense_variant	MODERATE	oac-4	WBGene00015873	C17A2.5	c.2116T>A	p.Phe706Ile	15.74
II	12606626	A	G	synonymous_variant	LOW	lips-15	WBGene00012585	Y38E10A.7	c.603A>G	p.Thr201Thr	15.69
II	3833327	A	T	missense_variant	MODERATE	oac-4	WBGene00015873	C17A2.5	c.2119T>A	p.Ser707Thr	15.63
IV	7595783	A	T	synonymous_variant	LOW	tag-80	WBGene00018468	F45E4.3a	c.6084A>T	p.Val2028Val	15.55
IV	7595783	A	T	synonymous_variant	LOW	tag-80	WBGene00018468	F45E4.3b	c.6084A>T	p.Val2028Val	15.55
IV	7593194	A	G	synonymous_variant	LOW	tag-80	WBGene00018468	F45E4.3a	c.3495A>G	p.Gln1165Gln	15.53
IV	7593194	A	G	synonymous_variant	LOW	tag-80	WBGene00018468	F45E4.3b	c.3495A>G	p.Gln1165Gln	15.53
IV	7591492	C	T	missense_variant	MODERATE	tag-80	WBGene00018468	F45E4.3a	c.1793C>T	p.Ser598Leu	15.51
IV	7591492	C	T	missense_variant	MODERATE	tag-80	WBGene00018468	F45E4.3b	c.1793C>T	p.Ser598Leu	15.51
IV	7593195	A	G	missense_variant	MODERATE	tag-80	WBGene00018468	F45E4.3a	c.3496A>G	p.Thr1166Ala	15.5
IV	7593195	A	G	missense_variant	MODERATE	tag-80	WBGene00018468	F45E4.3b	c.3496A>G	p.Thr1166Ala	15.5
IV	7591688	A	T	missense_variant	MODERATE	tag-80	WBGene00018468	F45E4.3a	c.1989A>T	p.Glu663Asp	15.43
IV	7591688	A	T	missense_variant	MODERATE	tag-80	WBGene00018468	F45E4.3b	c.1989A>T	p.Glu663Asp	15.43
II	12606619	T	C	missense_variant	MODERATE	lips-15	WBGene00012585	Y38E10A.7	c.596T>C	p.Val199Ala	15.41
X	3812118	T	A	synonymous_variant	LOW	F35A5.1	WBGene00018024	F35A5.1	c.4653T>A	p.Pro1551Pro	15.41
II	12606543	A	G	missense_variant	MODERATE	lips-15	WBGene00012585	Y38E10A.7	c.520A>G	p.Ile174Val	15.2
II	3833752	G	T	missense_variant	MODERATE	oac-4	WBGene00015873	C17A2.5	c.1748C>A	p.Thr583Lys	15.18
I	10275828	G	A	missense_variant	MODERATE	ZC247.1	WBGene00013859	ZC247.1	c.2123C>T	p.Ala708Val	15.14
IV	7593197	A	T	synonymous_variant	LOW	tag-80	WBGene00018468	F45E4.3a	c.3498A>T	p.Thr1166Thr	15.08
IV	7593197	A	T	synonymous_variant	LOW	tag-80	WBGene00018468	F45E4.3b	c.3498A>T	p.Thr1166Thr	15.08
X	9078292	A	G	synonymous_variant	LOW	F47E1.t1	WBGene00023052	F47E1.t1	c.34T>C	p.Leu12Leu	14.99
IV	7599133	T	C	synonymous_variant	LOW	tag-80	WBGene00018468	F45E4.3a	c.9363T>C	p.Ala3121Ala	14.97
IV	7599133	T	C	synonymous_variant	LOW	tag-80	WBGene00018468	F45E4.3b	c.9363T>C	p.Ala3121Ala	14.97
I	231982	C	T	missense_variant	MODERATE	Y48G1BM.6	WBGene00021671	Y48G1BM.6	c.3490G>A	p.Val1164Met	14.92
II	3835995	T	C	synonymous_variant	LOW	oac-4	WBGene00015873	C17A2.5	c.21A>G	p.Thr7Thr	14.74
II	3835997	T	G	missense_variant	MODERATE	oac-4	WBGene00015873	C17A2.5	c.19A>C	p.Thr7Pro	14.74
II	3833755	T	C	missense_variant	MODERATE	oac-4	WBGene00015873	C17A2.5	c.1745A>G	p.His582Arg	14.67
IV	7594409	T	A	missense_variant	MODERATE	tag-80	WBGene00018468	F45E4.3a	c.4710T>A	p.Asp1570Glu	14.64
IV	7594409	T	A	missense_variant	MODERATE	tag-80	WBGene00018468	F45E4.3b	c.4710T>A	p.Asp1570Glu	14.64
X	1836813	A	G	synonymous_variant	LOW	T26C11.2	WBGene00020828	T26C11.2	c.477A>G	p.Lys159Lys	14.54
II	3833761	T	C	missense_variant	MODERATE	oac-4	WBGene00015873	C17A2.5	c.1739A>G	p.Glu580Gly	14.53
II	12606660	G	A	missense_variant	MODERATE	lips-15	WBGene00012585	Y38E10A.7	c.637G>A	p.Asp213Asn	14.35
II	12606661	A	C	missense_variant	MODERATE	lips-15	WBGene00012585	Y38E10A.7	c.638A>C	p.Asp213Ala	14.35
I	10276584	A	T	synonymous_variant	LOW	ZC247.1	WBGene00013859	ZC247.1	c.1407T>A	p.Ser469Ser	14.33
II	3833269	C	T	missense_variant	MODERATE	oac-4	WBGene00015873	C17A2.5	c.2177G>A	p.Ser726Asn	14.3
II	3833887	G	A	synonymous_variant	LOW	oac-4	WBGene00015873	C17A2.5	c.1653C>T	p.Asp551Asp	14.28
IV	7594361	G	A	synonymous_variant	LOW	tag-80	WBGene00018468	F45E4.3a	c.4662G>A	p.Arg1554Arg	14.23
IV	7594361	G	A	synonymous_variant	LOW	tag-80	WBGene00018468	F45E4.3b	c.4662G>A	p.Arg1554Arg	14.23
II	3833318	G	T	missense_variant	MODERATE	oac-4	WBGene00015873	C17A2.5	c.2128C>A	p.Gln710Lys	14.17
II	7447258	T	G	missense_variant	MODERATE	Y9D1A.1	WBGene00021186	Y9D1A.1	c.494T>G	p.Val165Gly	14.07
II	12606566	T	A	synonymous_variant	LOW	lips-15	WBGene00012585	Y38E10A.7	c.543T>A	p.Ala181Ala	13.96
II	3833775	A	C	synonymous_variant	LOW	oac-4	WBGene00015873	C17A2.5	c.1725T>G	p.Gly575Gly	13.73
II	3833863	A	G	synonymous_variant	LOW	oac-4	WBGene00015873	C17A2.5	c.1677T>C	p.Ala559Ala	13.73
II	3833766	T	G	synonymous_variant	LOW	oac-4	WBGene00015873	C17A2.5	c.1734A>C	p.Ile578Ile	13.43
II	3833877	C	T	missense_variant	MODERATE	oac-4	WBGene00015873	C17A2.5	c.1663G>A	p.Glu555Lys	13.43
V	6179551	G	C	missense_variant	MODERATE	ttn-1	WBGene00006436	W06H8.8g	c.17585C>G	p.Pro5862Arg	13.33
V	6179551	G	C	missense_variant	MODERATE	ttn-1	WBGene00006436	W06H8.8e.2	c.17585C>G	p.Pro5862Arg	13.33
V	6179551	G	C	missense_variant	MODERATE	ttn-1	WBGene00006436	W06H8.8f.2	c.17585C>G	p.Pro5862Arg	13.33
V	6179551	G	C	missense_variant	MODERATE	ttn-1	WBGene00006436	W06H8.8e.1	c.17585C>G	p.Pro5862Arg	13.33
V	6179551	G	C	missense_variant	MODERATE	ttn-1	WBGene00006436	W06H8.8f.1	c.17585C>G	p.Pro5862Arg	13.33
V	6179551	G	C	missense_variant	MODERATE	ttn-1	WBGene00006436	W06H8.8d	c.17525C>G	p.Pro5842Arg	13.33
II	3833313	A	G	synonymous_variant	LOW	oac-4	WBGene00015873	C17A2.5	c.2133T>C	p.His711His	13.23
II	7123745	A	T	missense_variant	MODERATE	F10E7.2	WBGene00017344	F10E7.2	c.207A>T	p.Gln69His	13.23
IV	7598537	A	G	missense_variant	MODERATE	tag-80	WBGene00018468	F45E4.3a	c.8771A>G	p.Glu2924Gly	13.22
IV	7598537	A	G	missense_variant	MODERATE	tag-80	WBGene00018468	F45E4.3b	c.8771A>G	p.Glu2924Gly	13.22
II	3833867	T	C	missense_variant	MODERATE	oac-4	WBGene00015873	C17A2.5	c.1673A>G	p.Lys558Arg	13.15
II	3833881	A	G	synonymous_variant	LOW	oac-4	WBGene00015873	C17A2.5	c.1659T>C	p.Phe553Phe	13.15
X	3304526	C	T	synonymous_variant	LOW	F11D5.7	WBGene00043980	F11D5.7	c.96C>T	p.Val32Val	13.14
V	6178599	T	C	synonymous_variant	LOW	ttn-1	WBGene00006436	W06H8.8g	c.18537A>G	p.Val6179Val	13.13
V	6178599	T	C	synonymous_variant	LOW	ttn-1	WBGene00006436	W06H8.8e.2	c.18537A>G	p.Val6179Val	13.13
V	6178599	T	C	synonymous_variant	LOW	ttn-1	WBGene00006436	W06H8.8f.2	c.18537A>G	p.Val6179Val	13.13
V	6178599	T	C	synonymous_variant	LOW	ttn-1	WBGene00006436	W06H8.8e.1	c.18537A>G	p.Val6179Val	13.13
V	6178599	T	C	synonymous_variant	LOW	ttn-1	WBGene00006436	W06H8.8f.1	c.18537A>G	p.Val6179Val	13.13
V	6178599	T	C	synonymous_variant	LOW	ttn-1	WBGene00006436	W06H8.8d	c.18477A>G	p.Val6159Val	13.13
II	3833262	G	A	synonymous_variant	LOW	oac-4	WBGene00015873	C17A2.5	c.2184C>T	p.Cys728Cys	13.12
II	3833884	T	G	missense_variant	MODERATE	oac-4	WBGene00015873	C17A2.5	c.1656A>C	p.Lys552Asn	13.09
IV	16785007	C	G	missense_variant	MODERATE	Y43D4A.5	WBGene00012791	Y43D4A.5a	c.4588C>G	p.Leu1530Val	13.06
IV	16785007	C	G	missense_variant	MODERATE	Y43D4A.5	WBGene00012791	Y43D4A.5b	c.1822C>G	p.Leu608Val	13.06
IV	16785007	C	G	missense_variant	MODERATE	Y43D4A.5	WBGene00012791	Y43D4A.5c	c.4543C>G	p.Leu1515Val	13.06
IV	16785007	C	G	missense_variant	MODERATE	Y43D4A.5	WBGene00012791	Y43D4A.5d	c.1777C>G	p.Leu593Val	13.06
II	7123751	A	G	synonymous_variant	LOW	F10E7.2	WBGene00017344	F10E7.2	c.213A>G	p.Gln71Gln	12.89
V	6179549	T	A	missense_variant	MODERATE	ttn-1	WBGene00006436	W06H8.8g	c.17587A>T	p.Thr5863Ser	12.88
V	6179549	T	A	missense_variant	MODERATE	ttn-1	WBGene00006436	W06H8.8e.2	c.17587A>T	p.Thr5863Ser	12.88
V	6179549	T	A	missense_variant	MODERATE	ttn-1	WBGene00006436	W06H8.8f.2	c.17587A>T	p.Thr5863Ser	12.88
V	6179549	T	A	missense_variant	MODERATE	ttn-1	WBGene00006436	W06H8.8e.1	c.17587A>T	p.Thr5863Ser	12.88
V	6179549	T	A	missense_variant	MODERATE	ttn-1	WBGene00006436	W06H8.8f.1	c.17587A>T	p.Thr5863Ser	12.88
V	6179549	T	A	missense_variant	MODERATE	ttn-1	WBGene00006436	W06H8.8d	c.17527A>T	p.Thr5843Ser	12.88
II	3833258	C	T	missense_variant	MODERATE	oac-4	WBGene00015873	C17A2.5	c.2188G>A	p.Ala730Thr	12.84
IV	16788349	A	T	missense_variant&splice_region_variant	MODERATE	Y43D4A.6	WBGene00012792	Y43D4A.6	c.826A>T	p.Thr276Ser	12.42
II	12606638	A	C	missense_variant	MODERATE	lips-15	WBGene00012585	Y38E10A.7	c.615A>C	p.Lys205Asn	12.38
V	6180434	A	G	missense_variant	MODERATE	ttn-1	WBGene00006436	W06H8.8g	c.16702T>C	p.Ser5568Pro	12.3
V	6180434	A	G	missense_variant	MODERATE	ttn-1	WBGene00006436	W06H8.8e.2	c.16702T>C	p.Ser5568Pro	12.3
V	6180434	A	G	missense_variant	MODERATE	ttn-1	WBGene00006436	W06H8.8f.2	c.16702T>C	p.Ser5568Pro	12.3
V	6180434	A	G	missense_variant	MODERATE	ttn-1	WBGene00006436	W06H8.8e.1	c.16702T>C	p.Ser5568Pro	12.3
V	6180434	A	G	missense_variant	MODERATE	ttn-1	WBGene00006436	W06H8.8f.1	c.16702T>C	p.Ser5568Pro	12.3
V	6180434	A	G	missense_variant	MODERATE	ttn-1	WBGene00006436	W06H8.8d	c.16642T>C	p.Ser5548Pro	12.3
II	7123715	T	G	missense_variant	MODERATE	F10E7.2	WBGene00017344	F10E7.2	c.177T>G	p.Cys59Trp	12.24
III	9101378	T	A	missense_variant	MODERATE	ZK507.3	WBGene00013979	ZK507.3	c.12T>A	p.Ser4Arg	12.16
IV	7594894	A	C	missense_variant	MODERATE	tag-80	WBGene00018468	F45E4.3a	c.5195A>C	p.Lys1732Thr	12.02
IV	7594894	A	C	missense_variant	MODERATE	tag-80	WBGene00018468	F45E4.3b	c.5195A>C	p.Lys1732Thr	12.02
I	10275860	A	T	synonymous_variant	LOW	ZC247.1	WBGene00013859	ZC247.1	c.2091T>A	p.Ser697Ser	11.8
III	9101384	A	G	synonymous_variant	LOW	ZK507.3	WBGene00013979	ZK507.3	c.18A>G	p.Lys6Lys	11.75
V	6180792	C	T	synonymous_variant	LOW	ttn-1	WBGene00006436	W06H8.8g	c.16344G>A	p.Lys5448Lys	11.6
V	6180792	C	T	synonymous_variant	LOW	ttn-1	WBGene00006436	W06H8.8e.2	c.16344G>A	p.Lys5448Lys	11.6
V	6180792	C	T	synonymous_variant	LOW	ttn-1	WBGene00006436	W06H8.8f.2	c.16344G>A	p.Lys5448Lys	11.6
V	6180792	C	T	synonymous_variant	LOW	ttn-1	WBGene00006436	W06H8.8e.1	c.16344G>A	p.Lys5448Lys	11.6
V	6180792	C	T	synonymous_variant	LOW	ttn-1	WBGene00006436	W06H8.8f.1	c.16344G>A	p.Lys5448Lys	11.6
V	6180792	C	T	synonymous_variant	LOW	ttn-1	WBGene00006436	W06H8.8d	c.16284G>A	p.Lys5428Lys	11.6
V	6180795	G	T	synonymous_variant	LOW	ttn-1	WBGene00006436	W06H8.8g	c.16341C>A	p.Ser5447Ser	11.6
V	6180795	G	T	synonymous_variant	LOW	ttn-1	WBGene00006436	W06H8.8e.2	c.16341C>A	p.Ser5447Ser	11.6
V	6180795	G	T	synonymous_variant	LOW	ttn-1	WBGene00006436	W06H8.8f.2	c.16341C>A	p.Ser5447Ser	11.6
V	6180795	G	T	synonymous_variant	LOW	ttn-1	WBGene00006436	W06H8.8e.1	c.16341C>A	p.Ser5447Ser	11.6
V	6180795	G	T	synonymous_variant	LOW	ttn-1	WBGene00006436	W06H8.8f.1	c.16341C>A	p.Ser5447Ser	11.6
V	6180795	G	T	synonymous_variant	LOW	ttn-1	WBGene00006436	W06H8.8d	c.16281C>A	p.Ser5427Ser	11.6
X	3812218	A	G	missense_variant	MODERATE	F35A5.1	WBGene00018024	F35A5.1	c.4753A>G	p.Arg1585Gly	11.54
II	12606673	A	G	missense_variant	MODERATE	lips-15	WBGene00012585	Y38E10A.7	c.650A>G	p.Asp217Gly	11.5
II	3833857	C	A	missense_variant	MODERATE	oac-4	WBGene00015873	C17A2.5	c.1683G>T	p.Lys561Asn	10.95
I	11629874	C	T	missense_variant	MODERATE	W04G5.3	WBGene00012264	W04G5.3	c.161C>T	p.Ser54Phe	10.84
I	10267127	C	G	missense_variant	MODERATE	ZC247.1	WBGene00013859	ZC247.1	c.10824G>C	p.Leu3608Phe	10.77
I	10267129	A	G	synonymous_variant	LOW	ZC247.1	WBGene00013859	ZC247.1	c.10822T>C	p.Leu3608Leu	10.77
I	237848	T	G	missense_variant	MODERATE	Y48G1BM.6	WBGene00021671	Y48G1BM.6	c.199A>C	p.Thr67Pro	10.68
I	237851	G	A	missense_variant&splice_region_variant	MODERATE	Y48G1BM.6	WBGene00021671	Y48G1BM.6	c.196C>T	p.His66Tyr	10.68
I	10270769	T	G	synonymous_variant	LOW	ZC247.1	WBGene00013859	ZC247.1	c.7182A>C	p.Gly2394Gly	10.67
IV	7594434	G	A	missense_variant	MODERATE	tag-80	WBGene00018468	F45E4.3a	c.4735G>A	p.Ala1579Thr	10.63
IV	7594434	G	A	missense_variant	MODERATE	tag-80	WBGene00018468	F45E4.3b	c.4735G>A	p.Ala1579Thr	10.63
V	6181493	G	C	missense_variant	MODERATE	ttn-1	WBGene00006436	W06H8.8g	c.15643C>G	p.Leu5215Val	10.55
V	6181493	G	C	missense_variant	MODERATE	ttn-1	WBGene00006436	W06H8.8e.2	c.15643C>G	p.Leu5215Val	10.55
V	6181493	G	C	missense_variant	MODERATE	ttn-1	WBGene00006436	W06H8.8f.2	c.15643C>G	p.Leu5215Val	10.55
V	6181493	G	C	missense_variant	MODERATE	ttn-1	WBGene00006436	W06H8.8e.1	c.15643C>G	p.Leu5215Val	10.55
V	6181493	G	C	missense_variant	MODERATE	ttn-1	WBGene00006436	W06H8.8f.1	c.15643C>G	p.Leu5215Val	10.55
V	6181493	G	C	missense_variant	MODERATE	ttn-1	WBGene00006436	W06H8.8d	c.15643C>G	p.Leu5215Val	10.55
I	10270766	C	T	synonymous_variant	LOW	ZC247.1	WBGene00013859	ZC247.1	c.7185G>A	p.Pro2395Pro	10.54
IV	16787420	A	T	stop_gained	HIGH	Y43D4A.6	WBGene00012792	Y43D4A.6	c.94A>T	p.Lys32*	10.44
II	3833250	C	T	splice_region_variant&stop_retained_variant	LOW	oac-4	WBGene00015873	C17A2.5	c.2196G>A	p.Ter732Ter	10.43
I	10270304	T	C	synonymous_variant	LOW	ZC247.1	WBGene00013859	ZC247.1	c.7647A>G	p.Pro2549Pro	10.26
V	8707947	G	A	missense_variant	MODERATE	ZC178.2	WBGene00022536	ZC178.2	c.1934C>T	p.Ser645Phe	10.18
I	237845	T	G	missense_variant	MODERATE	Y48G1BM.6	WBGene00021671	Y48G1BM.6	c.202A>C	p.Thr68Pro	10.13
IV	7598490	G	A	synonymous_variant	LOW	tag-80	WBGene00018468	F45E4.3a	c.8724G>A	p.Arg2908Arg	10.13
IV	7598490	G	A	synonymous_variant	LOW	tag-80	WBGene00018468	F45E4.3b	c.8724G>A	p.Arg2908Arg	10.13
II	3833845	C	T	synonymous_variant	LOW	oac-4	WBGene00015873	C17A2.5	c.1695G>A	p.Leu565Leu	10.07
I	10274419	A	G	missense_variant	MODERATE	ZC247.1	WBGene00013859	ZC247.1	c.3532T>C	p.Phe1178Leu	10.04
I	10266739	A	G	missense_variant	MODERATE	ZC247.1	WBGene00013859	ZC247.1	c.11212T>C	p.Tyr3738His	9.91
IV	16787369	G	A	missense_variant	MODERATE	Y43D4A.6	WBGene00012792	Y43D4A.6	c.43G>A	p.Gly15Arg	9.9
I	11629866	A	T	missense_variant	MODERATE	W04G5.3	WBGene00012264	W04G5.3	c.153A>T	p.Leu51Phe	9.84
III	9101445	T	C	splice_region_variant&intron_variant	LOW	ZK507.3	WBGene00013979	ZK507.3	c.71+8T>C		9.83
V	6178320	C	T	synonymous_variant	LOW	ttn-1	WBGene00006436	W06H8.8g	c.18816G>A	p.Lys6272Lys	9.81
V	6178320	C	T	synonymous_variant	LOW	ttn-1	WBGene00006436	W06H8.8e.2	c.18816G>A	p.Lys6272Lys	9.81
V	6178320	C	T	synonymous_variant	LOW	ttn-1	WBGene00006436	W06H8.8f.2	c.18816G>A	p.Lys6272Lys	9.81
V	6178320	C	T	synonymous_variant	LOW	ttn-1	WBGene00006436	W06H8.8e.1	c.18816G>A	p.Lys6272Lys	9.81
V	6178320	C	T	synonymous_variant	LOW	ttn-1	WBGene00006436	W06H8.8f.1	c.18816G>A	p.Lys6272Lys	9.81
V	6178320	C	T	synonymous_variant	LOW	ttn-1	WBGene00006436	W06H8.8d	c.18756G>A	p.Lys6252Lys	9.81
I	11629911	T	A	synonymous_variant	LOW	W04G5.3	WBGene00012264	W04G5.3	c.198T>A	p.Ile66Ile	9.51
I	10275065	C	T	synonymous_variant	LOW	ZC247.1	WBGene00013859	ZC247.1	c.2886G>A	p.Lys962Lys	9.27
I	5163007	C	T	synonymous_variant	LOW	let-630	WBGene00002804	Y110A7A.19	c.1674G>A	p.Leu558Leu	9.25
IV	7593229	C	T	missense_variant	MODERATE	tag-80	WBGene00018468	F45E4.3a	c.3530C>T	p.Ala1177Val	9.16
IV	7593229	C	T	missense_variant	MODERATE	tag-80	WBGene00018468	F45E4.3b	c.3530C>T	p.Ala1177Val	9.16
IV	7593233	G	A	synonymous_variant	LOW	tag-80	WBGene00018468	F45E4.3a	c.3534G>A	p.Arg1178Arg	9.16
IV	7593233	G	A	synonymous_variant	LOW	tag-80	WBGene00018468	F45E4.3b	c.3534G>A	p.Arg1178Arg	9.16
III	5507102	G	T	missense_variant	MODERATE	D1044.7	WBGene00017032	D1044.7	c.1151C>A	p.Thr384Asn	9.05
I	10276290	G	A	missense_variant	MODERATE	ZC247.1	WBGene00013859	ZC247.1	c.1661C>T	p.Ala554Val	8.8
II	3833828	C	T	splice_region_variant&intron_variant	LOW	oac-4	WBGene00015873	C17A2.5	c.1709+3G>A		8.79
X	11872535	T	G	missense_variant	MODERATE	F54F7.t1	WBGene00014395	F54F7.t1	c.30T>G	p.Ser10Arg	8.71
II	7367574	T	C	missense_variant	MODERATE	F43E2.6	WBGene00018394	F43E2.6a	c.211A>G	p.Asn71Asp	8.38
II	7367574	T	C	missense_variant	MODERATE	F43E2.6	WBGene00018394	F43E2.6b.1	c.187A>G	p.Asn63Asp	8.38
II	7367574	T	C	missense_variant	MODERATE	F43E2.6	WBGene00018394	F43E2.6b.2	c.187A>G	p.Asn63Asp	8.38
II	12606839	A	T	synonymous_variant	LOW	lips-15	WBGene00012585	Y38E10A.7	c.765A>T	p.Ala255Ala	8.35
II	3833823	G	A	splice_region_variant&intron_variant	LOW	oac-4	WBGene00015873	C17A2.5	c.1709+8C>T		8.33
II	12606842	G	T	synonymous_variant	LOW	lips-15	WBGene00012585	Y38E10A.7	c.768G>T	p.Thr256Thr	8.31
X	9464036	T	G	missense_variant	MODERATE	ZK899.6	WBGene00014144	ZK899.6	c.585T>G	p.Asp195Glu	8.3
II	3835938	A	G	synonymous_variant	LOW	oac-4	WBGene00015873	C17A2.5	c.78T>C	p.Phe26Phe	8.17
II	3835945	A	C	missense_variant	MODERATE	oac-4	WBGene00015873	C17A2.5	c.71T>G	p.Leu24Arg	8.17
II	12606845	C	A	synonymous_variant	LOW	lips-15	WBGene00012585	Y38E10A.7	c.771C>A	p.Ala257Ala	8.09
I	10266776	G	A	synonymous_variant	LOW	ZC247.1	WBGene00013859	ZC247.1	c.11175C>T	p.Ser3725Ser	7.98
I	10273448	C	T	synonymous_variant	LOW	ZC247.1	WBGene00013859	ZC247.1	c.4503G>A	p.Lys1501Lys	7.93
IV	7595771	G	A	synonymous_variant	LOW	tag-80	WBGene00018468	F45E4.3a	c.6072G>A	p.Arg2024Arg	7.78
IV	7595771	G	A	synonymous_variant	LOW	tag-80	WBGene00018468	F45E4.3b	c.6072G>A	p.Arg2024Arg	7.78
V	6181047	A	T	missense_variant	MODERATE	ttn-1	WBGene00006436	W06H8.8g	c.16089T>A	p.Asp5363Glu	7.75
V	6181047	A	T	missense_variant	MODERATE	ttn-1	WBGene00006436	W06H8.8e.2	c.16089T>A	p.Asp5363Glu	7.75
V	6181047	A	T	missense_variant	MODERATE	ttn-1	WBGene00006436	W06H8.8f.2	c.16089T>A	p.Asp5363Glu	7.75
V	6181047	A	T	missense_variant	MODERATE	ttn-1	WBGene00006436	W06H8.8e.1	c.16089T>A	p.Asp5363Glu	7.75
V	6181047	A	T	missense_variant	MODERATE	ttn-1	WBGene00006436	W06H8.8f.1	c.16089T>A	p.Asp5363Glu	7.75
V	6181047	A	T	missense_variant	MODERATE	ttn-1	WBGene00006436	W06H8.8d	c.16089T>A	p.Asp5363Glu	7.75
I	10271089	T	C	missense_variant	MODERATE	ZC247.1	WBGene00013859	ZC247.1	c.6862A>G	p.Asn2288Asp	7.69
III	9101487	C	A	missense_variant&splice_region_variant	MODERATE	ZK507.3	WBGene00013979	ZK507.3	c.72C>A	p.Asn24Lys	7.69
IV	7727363	A	G	synonymous_variant	LOW	C50F7.5	WBGene00016845	C50F7.5	c.645A>G	p.Val215Val	7.63
V	6180840	T	C	synonymous_variant	LOW	ttn-1	WBGene00006436	W06H8.8g	c.16296A>G	p.Ala5432Ala	7.6
V	6180840	T	C	synonymous_variant	LOW	ttn-1	WBGene00006436	W06H8.8e.2	c.16296A>G	p.Ala5432Ala	7.6
V	6180840	T	C	synonymous_variant	LOW	ttn-1	WBGene00006436	W06H8.8f.2	c.16296A>G	p.Ala5432Ala	7.6
V	6180840	T	C	synonymous_variant	LOW	ttn-1	WBGene00006436	W06H8.8e.1	c.16296A>G	p.Ala5432Ala	7.6
V	6180840	T	C	synonymous_variant	LOW	ttn-1	WBGene00006436	W06H8.8f.1	c.16296A>G	p.Ala5432Ala	7.6
V	6180840	T	C	synonymous_variant	LOW	ttn-1	WBGene00006436	W06H8.8d	c.16236A>G	p.Ala5412Ala	7.6
II	3835809	A	G	synonymous_variant	LOW	oac-4	WBGene00015873	C17A2.5	c.163T>C	p.Leu55Leu	7.5
IV	16780557	C	T	missense_variant	MODERATE	Y43D4A.5	WBGene00012791	Y43D4A.5a	c.3860C>T	p.Ser1287Leu	7.46
IV	16780557	C	T	missense_variant	MODERATE	Y43D4A.5	WBGene00012791	Y43D4A.5b	c.1094C>T	p.Ser365Leu	7.46
IV	16780557	C	T	missense_variant	MODERATE	Y43D4A.5	WBGene00012791	Y43D4A.5c	c.3860C>T	p.Ser1287Leu	7.46
IV	16780557	C	T	missense_variant	MODERATE	Y43D4A.5	WBGene00012791	Y43D4A.5d	c.1094C>T	p.Ser365Leu	7.46
IV	16780558	A	C	synonymous_variant	LOW	Y43D4A.5	WBGene00012791	Y43D4A.5a	c.3861A>C	p.Ser1287Ser	7.46
IV	16780558	A	C	synonymous_variant	LOW	Y43D4A.5	WBGene00012791	Y43D4A.5b	c.1095A>C	p.Ser365Ser	7.46
IV	16780558	A	C	synonymous_variant	LOW	Y43D4A.5	WBGene00012791	Y43D4A.5c	c.3861A>C	p.Ser1287Ser	7.46
IV	16780558	A	C	synonymous_variant	LOW	Y43D4A.5	WBGene00012791	Y43D4A.5d	c.1095A>C	p.Ser365Ser	7.46
V	1643012	G	C	synonymous_variant	LOW	Y46H3D.1	WBGene00021608	Y46H3D.1	c.171G>C	p.Ser57Ser	7.46
V	6181025	C	G	missense_variant	MODERATE	ttn-1	WBGene00006436	W06H8.8g	c.16111G>C	p.Glu5371Gln	7.46
V	6181025	C	G	missense_variant	MODERATE	ttn-1	WBGene00006436	W06H8.8e.2	c.16111G>C	p.Glu5371Gln	7.46
V	6181025	C	G	missense_variant	MODERATE	ttn-1	WBGene00006436	W06H8.8f.2	c.16111G>C	p.Glu5371Gln	7.46
V	6181025	C	G	missense_variant	MODERATE	ttn-1	WBGene00006436	W06H8.8e.1	c.16111G>C	p.Glu5371Gln	7.46
V	6181025	C	G	missense_variant	MODERATE	ttn-1	WBGene00006436	W06H8.8f.1	c.16111G>C	p.Glu5371Gln	7.46
V	6181025	C	G	missense_variant	MODERATE	ttn-1	WBGene00006436	W06H8.8d	c.16111G>C	p.Glu5371Gln	7.46
V	6181036	G	T	missense_variant	MODERATE	ttn-1	WBGene00006436	W06H8.8g	c.16100C>A	p.Thr5367Lys	7.46
V	6181036	G	T	missense_variant	MODERATE	ttn-1	WBGene00006436	W06H8.8e.2	c.16100C>A	p.Thr5367Lys	7.46
V	6181036	G	T	missense_variant	MODERATE	ttn-1	WBGene00006436	W06H8.8f.2	c.16100C>A	p.Thr5367Lys	7.46
V	6181036	G	T	missense_variant	MODERATE	ttn-1	WBGene00006436	W06H8.8e.1	c.16100C>A	p.Thr5367Lys	7.46
V	6181036	G	T	missense_variant	MODERATE	ttn-1	WBGene00006436	W06H8.8f.1	c.16100C>A	p.Thr5367Lys	7.46
V	6181036	G	T	missense_variant	MODERATE	ttn-1	WBGene00006436	W06H8.8d	c.16100C>A	p.Thr5367Lys	7.46
II	12606848	A	G	synonymous_variant	LOW	lips-15	WBGene00012585	Y38E10A.7	c.774A>G	p.Glu258Glu	7.42
II	7367579	T	C	missense_variant	MODERATE	F43E2.6	WBGene00018394	F43E2.6a	c.206A>G	p.Asp69Gly	7.37
II	7367579	T	C	missense_variant	MODERATE	F43E2.6	WBGene00018394	F43E2.6b.1	c.182A>G	p.Asp61Gly	7.37
II	7367579	T	C	missense_variant	MODERATE	F43E2.6	WBGene00018394	F43E2.6b.2	c.182A>G	p.Asp61Gly	7.37
II	7367587	G	A	synonymous_variant	LOW	F43E2.6	WBGene00018394	F43E2.6a	c.198C>T	p.Gly66Gly	7.37
II	7367587	G	A	synonymous_variant	LOW	F43E2.6	WBGene00018394	F43E2.6b.1	c.174C>T	p.Gly58Gly	7.37
II	7367587	G	A	synonymous_variant	LOW	F43E2.6	WBGene00018394	F43E2.6b.2	c.174C>T	p.Gly58Gly	7.37
II	3835962	A	G	synonymous_variant	LOW	oac-4	WBGene00015873	C17A2.5	c.54T>C	p.Leu18Leu	7.35
I	4765836	C	T	missense_variant	MODERATE	M04F3.2	WBGene00019768	M04F3.2	c.83C>T	p.Pro28Leu	7.33
I	4765837	T	G	synonymous_variant	LOW	M04F3.2	WBGene00019768	M04F3.2	c.84T>G	p.Pro28Pro	7.33
I	10266820	A	C	missense_variant	MODERATE	ZC247.1	WBGene00013859	ZC247.1	c.11131T>G	p.Ser3711Ala	7.25
V	1642997	C	T	synonymous_variant	LOW	Y46H3D.1	WBGene00021608	Y46H3D.1	c.156C>T	p.Val52Val	7.2
I	10266811	G	A	synonymous_variant	LOW	ZC247.1	WBGene00013859	ZC247.1	c.11140C>T	p.Leu3714Leu	7.19
II	12606855	A	G	missense_variant&splice_region_variant	MODERATE	lips-15	WBGene00012585	Y38E10A.7	c.781A>G	p.Asn261Asp	7.16
IV	7595734	C	A	missense_variant	MODERATE	tag-80	WBGene00018468	F45E4.3a	c.6035C>A	p.Ala2012Asp	7.08
IV	7595734	C	A	missense_variant	MODERATE	tag-80	WBGene00018468	F45E4.3b	c.6035C>A	p.Ala2012Asp	7.08
V	1642949	T	C	synonymous_variant	LOW	Y46H3D.1	WBGene00021608	Y46H3D.1	c.108T>C	p.Ala36Ala	7.06
I	10275362	C	G	synonymous_variant	LOW	ZC247.1	WBGene00013859	ZC247.1	c.2589G>C	p.Ser863Ser	7.01
V	6178446	C	T	synonymous_variant	LOW	ttn-1	WBGene00006436	W06H8.8g	c.18690G>A	p.Val6230Val	6.97
V	6178446	C	T	synonymous_variant	LOW	ttn-1	WBGene00006436	W06H8.8e.2	c.18690G>A	p.Val6230Val	6.97
V	6178446	C	T	synonymous_variant	LOW	ttn-1	WBGene00006436	W06H8.8f.2	c.18690G>A	p.Val6230Val	6.97
V	6178446	C	T	synonymous_variant	LOW	ttn-1	WBGene00006436	W06H8.8e.1	c.18690G>A	p.Val6230Val	6.97
V	6178446	C	T	synonymous_variant	LOW	ttn-1	WBGene00006436	W06H8.8f.1	c.18690G>A	p.Val6230Val	6.97
V	6178446	C	T	synonymous_variant	LOW	ttn-1	WBGene00006436	W06H8.8d	c.18630G>A	p.Val6210Val	6.97
I	10275194	A	T	synonymous_variant	LOW	ZC247.1	WBGene00013859	ZC247.1	c.2757T>A	p.Ser919Ser	6.8
I	12027210	G	A	synonymous_variant	LOW	Y53C10A.10	WBGene00013138	Y53C10A.10	c.3684G>A	p.Pro1228Pro	6.69
IV	7727372	A	C	synonymous_variant	LOW	C50F7.5	WBGene00016845	C50F7.5	c.654A>C	p.Ser218Ser	6.65
II	3835923	T	C	synonymous_variant	LOW	oac-4	WBGene00015873	C17A2.5	c.93A>G	p.Ala31Ala	6.54
II	3835927	G	A	missense_variant	MODERATE	oac-4	WBGene00015873	C17A2.5	c.89C>T	p.Pro30Leu	6.54
IV	7591739	T	C	synonymous_variant	LOW	tag-80	WBGene00018468	F45E4.3a	c.2040T>C	p.His680His	6.54
IV	7591739	T	C	synonymous_variant	LOW	tag-80	WBGene00018468	F45E4.3b	c.2040T>C	p.His680His	6.54
V	6178389	C	A	synonymous_variant	LOW	ttn-1	WBGene00006436	W06H8.8g	c.18747G>T	p.Val6249Val	6.53
V	6178389	C	A	synonymous_variant	LOW	ttn-1	WBGene00006436	W06H8.8e.2	c.18747G>T	p.Val6249Val	6.53
V	6178389	C	A	synonymous_variant	LOW	ttn-1	WBGene00006436	W06H8.8f.2	c.18747G>T	p.Val6249Val	6.53
V	6178389	C	A	synonymous_variant	LOW	ttn-1	WBGene00006436	W06H8.8e.1	c.18747G>T	p.Val6249Val	6.53
V	6178389	C	A	synonymous_variant	LOW	ttn-1	WBGene00006436	W06H8.8f.1	c.18747G>T	p.Val6249Val	6.53
V	6178389	C	A	synonymous_variant	LOW	ttn-1	WBGene00006436	W06H8.8d	c.18687G>T	p.Val6229Val	6.53
V	1642967	T	C	synonymous_variant	LOW	Y46H3D.1	WBGene00021608	Y46H3D.1	c.126T>C	p.Val42Val	6.47
V	1642970	T	G	synonymous_variant	LOW	Y46H3D.1	WBGene00021608	Y46H3D.1	c.129T>G	p.Pro43Pro	6.47
I	10267027	A	G	missense_variant	MODERATE	ZC247.1	WBGene00013859	ZC247.1	c.10924T>C	p.Phe3642Leu	6.41
IV	7593239	T	G	synonymous_variant	LOW	tag-80	WBGene00018468	F45E4.3a	c.3540T>G	p.Pro1180Pro	6.38
IV	7593239	T	G	synonymous_variant	LOW	tag-80	WBGene00018468	F45E4.3b	c.3540T>G	p.Pro1180Pro	6.38
I	10274853	G	T	missense_variant	MODERATE	ZC247.1	WBGene00013859	ZC247.1	c.3098C>A	p.Thr1033Asn	6.32
II	11215521	A	G	missense_variant	MODERATE	srap-1	WBGene00011522	T06D8.1a	c.7349A>G	p.Asp2450Gly	6.18
II	11215521	A	G	missense_variant	MODERATE	srap-1	WBGene00011522	T06D8.1b	c.7349A>G	p.Asp2450Gly	6.18
II	11215521	A	G	missense_variant	MODERATE	srap-1	WBGene00011522	T06D8.1c	c.6737A>G	p.Asp2246Gly	6.18
IV	7599100	C	A	missense_variant	MODERATE	tag-80	WBGene00018468	F45E4.3a	c.9330C>A	p.His3110Gln	6.18
IV	7599100	C	A	missense_variant	MODERATE	tag-80	WBGene00018468	F45E4.3b	c.9330C>A	p.His3110Gln	6.18
IV	7599106	T	A	missense_variant	MODERATE	tag-80	WBGene00018468	F45E4.3a	c.9336T>A	p.Asp3112Glu	6.18
IV	7599106	T	A	missense_variant	MODERATE	tag-80	WBGene00018468	F45E4.3b	c.9336T>A	p.Asp3112Glu	6.18
IV	7727382	A	C	missense_variant	MODERATE	C50F7.5	WBGene00016845	C50F7.5	c.664A>C	p.Lys222Gln	6.15
II	3835843	G	A	synonymous_variant	LOW	oac-4	WBGene00015873	C17A2.5	c.129C>T	p.Phe43Phe	6.1
V	1642941	A	G	missense_variant	MODERATE	Y46H3D.1	WBGene00021608	Y46H3D.1	c.100A>G	p.Lys34Glu	6.04
V	8701699	T	G	missense_variant	MODERATE	ZC178.1	WBGene00022535	ZC178.1	c.268T>G	p.Leu90Val	5.94
I	238637	A	G	synonymous_variant	LOW	Y48G1BM.7	WBGene00021672	Y48G1BM.7	c.315T>C	p.Ser105Ser	5.89
I	10270997	C	T	synonymous_variant	LOW	ZC247.1	WBGene00013859	ZC247.1	c.6954G>A	p.Pro2318Pro	5.88
IV	7593768	G	A	missense_variant	MODERATE	tag-80	WBGene00018468	F45E4.3a	c.4069G>A	p.Val1357Ile	5.85
IV	7593768	G	A	missense_variant	MODERATE	tag-80	WBGene00018468	F45E4.3b	c.4069G>A	p.Val1357Ile	5.85
II	7367568	T	C	missense_variant	MODERATE	F43E2.6	WBGene00018394	F43E2.6a	c.217A>G	p.Met73Val	5.83
II	7367568	T	C	missense_variant	MODERATE	F43E2.6	WBGene00018394	F43E2.6b.1	c.193A>G	p.Met65Val	5.83
II	7367568	T	C	missense_variant	MODERATE	F43E2.6	WBGene00018394	F43E2.6b.2	c.193A>G	p.Met65Val	5.83
II	3835911	A	G	synonymous_variant	LOW	oac-4	WBGene00015873	C17A2.5	c.105T>C	p.Asn35Asn	5.73
III	9101520	A	T	synonymous_variant	LOW	ZK507.3	WBGene00013979	ZK507.3	c.105A>T	p.Gly35Gly	5.69
IV	7595676	G	A	missense_variant	MODERATE	tag-80	WBGene00018468	F45E4.3a	c.5977G>A	p.Glu1993Lys	5.49
IV	7595676	G	A	missense_variant	MODERATE	tag-80	WBGene00018468	F45E4.3b	c.5977G>A	p.Glu1993Lys	5.49
III	9101511	C	T	synonymous_variant	LOW	ZK507.3	WBGene00013979	ZK507.3	c.96C>T	p.Gly32Gly	5.43
V	8701833	G	A	synonymous_variant	LOW	ZC178.1	WBGene00022535	ZC178.1	c.402G>A	p.Leu134Leu	5.43
I	5162849	G	A	missense_variant	MODERATE	let-630	WBGene00002804	Y110A7A.19	c.1832C>T	p.Thr611Ile	5.36
I	10276088	A	G	synonymous_variant	LOW	ZC247.1	WBGene00013859	ZC247.1	c.1863T>C	p.Tyr621Tyr	5.32
IV	16780651	G	T	splice_region_variant&intron_variant	LOW	Y43D4A.5	WBGene00012791	Y43D4A.5a	c.3947+7G>T		5.22
IV	16780651	G	T	splice_region_variant&intron_variant	LOW	Y43D4A.5	WBGene00012791	Y43D4A.5b	c.1181+7G>T		5.22
IV	16780651	G	T	splice_region_variant&intron_variant	LOW	Y43D4A.5	WBGene00012791	Y43D4A.5c	c.3947+7G>T		5.22
IV	16780651	G	T	splice_region_variant&intron_variant	LOW	Y43D4A.5	WBGene00012791	Y43D4A.5d	c.1181+7G>T		5.22
I	10273649	C	G	missense_variant	MODERATE	ZC247.1	WBGene00013859	ZC247.1	c.4302G>C	p.Met1434Ile	5.16
II	7367520	C	A	missense_variant	MODERATE	F43E2.6	WBGene00018394	F43E2.6a	c.265G>T	p.Asp89Tyr	5.16
II	7367520	C	A	missense_variant	MODERATE	F43E2.6	WBGene00018394	F43E2.6b.1	c.241G>T	p.Asp81Tyr	5.16
II	7367520	C	A	missense_variant	MODERATE	F43E2.6	WBGene00018394	F43E2.6b.2	c.241G>T	p.Asp81Tyr	5.16
II	3835885	A	G	splice_region_variant&intron_variant	LOW	oac-4	WBGene00015873	C17A2.5	c.125+6T>C		5.15
I	10275315	G	T	missense_variant	MODERATE	ZC247.1	WBGene00013859	ZC247.1	c.2636C>A	p.Thr879Asn	5.13
I	10275395	A	G	synonymous_variant	LOW	ZC247.1	WBGene00013859	ZC247.1	c.2556T>C	p.Tyr852Tyr	5.13
IV	7727387	T	A	synonymous_variant	LOW	C50F7.5	WBGene00016845	C50F7.5	c.669T>A	p.Pro223Pro	5.11
IV	11144984	G	T	missense_variant	MODERATE	F01G4.4	WBGene00008503	F01G4.4b	c.1442G>T	p.Arg481Ile	5.03
IV	11144984	G	T	missense_variant	MODERATE	F01G4.4	WBGene00008503	F01G4.4a	c.1442G>T	p.Arg481Ile	5.03
IV	7727392	A	G	missense_variant	MODERATE	C50F7.5	WBGene00016845	C50F7.5	c.674A>G	p.Glu225Gly	4.98
IV	7727393	A	C	missense_variant	MODERATE	C50F7.5	WBGene00016845	C50F7.5	c.675A>C	p.Glu225Asp	4.98
IV	16780546	C	T	synonymous_variant	LOW	Y43D4A.5	WBGene00012791	Y43D4A.5a	c.3849C>T	p.His1283His	4.96
IV	16780546	C	T	synonymous_variant	LOW	Y43D4A.5	WBGene00012791	Y43D4A.5b	c.1083C>T	p.His361His	4.96
IV	16780546	C	T	synonymous_variant	LOW	Y43D4A.5	WBGene00012791	Y43D4A.5c	c.3849C>T	p.His1283His	4.96
IV	16780546	C	T	synonymous_variant	LOW	Y43D4A.5	WBGene00012791	Y43D4A.5d	c.1083C>T	p.His361His	4.96
II	7367499	G	T	missense_variant	MODERATE	F43E2.6	WBGene00018394	F43E2.6a	c.286C>A	p.Leu96Ile	4.92
II	7367499	G	T	missense_variant	MODERATE	F43E2.6	WBGene00018394	F43E2.6b.1	c.262C>A	p.Leu88Ile	4.92
II	7367499	G	T	missense_variant	MODERATE	F43E2.6	WBGene00018394	F43E2.6b.2	c.262C>A	p.Leu88Ile	4.92
I	10276474	G	T	missense_variant	MODERATE	ZC247.1	WBGene00013859	ZC247.1	c.1517C>A	p.Thr506Asn	4.9
IV	7727406	G	A	missense_variant	MODERATE	C50F7.5	WBGene00016845	C50F7.5	c.688G>A	p.Gly230Arg	4.89
X	3304512	A	C	missense_variant	MODERATE	F11D5.7	WBGene00043980	F11D5.7	c.82A>C	p.Ile28Leu	4.85
II	7123998	A	G	missense_variant	MODERATE	F10E7.2	WBGene00017344	F10E7.2	c.335A>G	p.Asp112Gly	4.74
II	12606860	C	T	splice_region_variant&intron_variant	LOW	lips-15	WBGene00012585	Y38E10A.7	c.783+3C>T		4.67
IV	16780527	C	A	missense_variant	MODERATE	Y43D4A.5	WBGene00012791	Y43D4A.5a	c.3830C>A	p.Ser1277Tyr	4.62
IV	16780527	C	A	missense_variant	MODERATE	Y43D4A.5	WBGene00012791	Y43D4A.5b	c.1064C>A	p.Ser355Tyr	4.62
IV	16780527	C	A	missense_variant	MODERATE	Y43D4A.5	WBGene00012791	Y43D4A.5c	c.3830C>A	p.Ser1277Tyr	4.62
IV	16780527	C	A	missense_variant	MODERATE	Y43D4A.5	WBGene00012791	Y43D4A.5d	c.1064C>A	p.Ser355Tyr	4.62
IV	7727405	A	G	synonymous_variant	LOW	C50F7.5	WBGene00016845	C50F7.5	c.687A>G	p.Pro229Pro	4.61
V	6181508	G	C	missense_variant	MODERATE	ttn-1	WBGene00006436	W06H8.8g	c.15628C>G	p.Gln5210Glu	4.59
V	6181508	G	C	missense_variant	MODERATE	ttn-1	WBGene00006436	W06H8.8e.2	c.15628C>G	p.Gln5210Glu	4.59
V	6181508	G	C	missense_variant	MODERATE	ttn-1	WBGene00006436	W06H8.8f.2	c.15628C>G	p.Gln5210Glu	4.59
V	6181508	G	C	missense_variant	MODERATE	ttn-1	WBGene00006436	W06H8.8e.1	c.15628C>G	p.Gln5210Glu	4.59
V	6181508	G	C	missense_variant	MODERATE	ttn-1	WBGene00006436	W06H8.8f.1	c.15628C>G	p.Gln5210Glu	4.59
V	6181508	G	C	missense_variant	MODERATE	ttn-1	WBGene00006436	W06H8.8d	c.15628C>G	p.Gln5210Glu	4.59
V	17116115	T	G	synonymous_variant	LOW	ZK218.8	WBGene00013942	ZK218.8	c.90T>G	p.Val30Val	4.5
X	15227890	T	G	missense_variant	MODERATE	H03A11.2	WBGene00010357	H03A11.2	c.2129A>C	p.Gln710Pro	4.47
IV	7597400	A	G	missense_variant	MODERATE	tag-80	WBGene00018468	F45E4.3a	c.7634A>G	p.Gln2545Arg	4.4
IV	7597400	A	G	missense_variant	MODERATE	tag-80	WBGene00018468	F45E4.3b	c.7634A>G	p.Gln2545Arg	4.4
IV	6922257	C	G	missense_variant	MODERATE	T22D1.2	WBGene00020681	T22D1.2	c.314C>G	p.Thr105Ser	4.38
IV	6922262	C	A	missense_variant	MODERATE	T22D1.2	WBGene00020681	T22D1.2	c.319C>A	p.Pro107Thr	4.38
IV	6922577	G	A	missense_variant	MODERATE	T22D1.2	WBGene00020681	T22D1.2	c.634G>A	p.Ala212Thr	4.37
IV	7595767	T	C	missense_variant	MODERATE	tag-80	WBGene00018468	F45E4.3a	c.6068T>C	p.Val2023Ala	4.3
IV	7595767	T	C	missense_variant	MODERATE	tag-80	WBGene00018468	F45E4.3b	c.6068T>C	p.Val2023Ala	4.3
II	11216020	A	G	synonymous_variant	LOW	srap-1	WBGene00011522	T06D8.1a	c.7848A>G	p.Glu2616Glu	4.26
II	11216020	A	G	synonymous_variant	LOW	srap-1	WBGene00011522	T06D8.1b	c.7848A>G	p.Glu2616Glu	4.26
II	11216020	A	G	synonymous_variant	LOW	srap-1	WBGene00011522	T06D8.1c	c.7236A>G	p.Glu2412Glu	4.26
IV	7595818	G	A	missense_variant	MODERATE	tag-80	WBGene00018468	F45E4.3a	c.6119G>A	p.Gly2040Glu	4.19
IV	7595818	G	A	missense_variant	MODERATE	tag-80	WBGene00018468	F45E4.3b	c.6119G>A	p.Gly2040Glu	4.19
IV	7598559	A	G	synonymous_variant	LOW	tag-80	WBGene00018468	F45E4.3a	c.8793A>G	p.Ser2931Ser	4.19
IV	7598559	A	G	synonymous_variant	LOW	tag-80	WBGene00018468	F45E4.3b	c.8793A>G	p.Ser2931Ser	4.19
IV	7598597	C	T	missense_variant	MODERATE	tag-80	WBGene00018468	F45E4.3a	c.8831C>T	p.Thr2944Met	4.19
IV	7598597	C	T	missense_variant	MODERATE	tag-80	WBGene00018468	F45E4.3b	c.8831C>T	p.Thr2944Met	4.19
IV	6922586	T	A	missense_variant	MODERATE	T22D1.2	WBGene00020681	T22D1.2	c.643T>A	p.Tyr215Asn	4.12
V	6181323	T	C	synonymous_variant	LOW	ttn-1	WBGene00006436	W06H8.8g	c.15813A>G	p.Ala5271Ala	4.04
V	6181323	T	C	synonymous_variant	LOW	ttn-1	WBGene00006436	W06H8.8e.2	c.15813A>G	p.Ala5271Ala	4.04
V	6181323	T	C	synonymous_variant	LOW	ttn-1	WBGene00006436	W06H8.8f.2	c.15813A>G	p.Ala5271Ala	4.04
V	6181323	T	C	synonymous_variant	LOW	ttn-1	WBGene00006436	W06H8.8e.1	c.15813A>G	p.Ala5271Ala	4.04
V	6181323	T	C	synonymous_variant	LOW	ttn-1	WBGene00006436	W06H8.8f.1	c.15813A>G	p.Ala5271Ala	4.04
V	6181323	T	C	synonymous_variant	LOW	ttn-1	WBGene00006436	W06H8.8d	c.15813A>G	p.Ala5271Ala	4.04
V	8701774	A	G	missense_variant	MODERATE	ZC178.1	WBGene00022535	ZC178.1	c.343A>G	p.Asn115Asp	3.99
I	10271000	T	G	synonymous_variant	LOW	ZC247.1	WBGene00013859	ZC247.1	c.6951A>C	p.Gly2317Gly	3.94
IV	7592301	A	C	missense_variant	MODERATE	tag-80	WBGene00018468	F45E4.3a	c.2602A>C	p.Asn868His	3.92
IV	7592301	A	C	missense_variant	MODERATE	tag-80	WBGene00018468	F45E4.3b	c.2602A>C	p.Asn868His	3.92
IV	16780636	C	T	synonymous_variant	LOW	Y43D4A.5	WBGene00012791	Y43D4A.5a	c.3939C>T	p.Ile1313Ile	3.91
IV	16780636	C	T	synonymous_variant	LOW	Y43D4A.5	WBGene00012791	Y43D4A.5b	c.1173C>T	p.Ile391Ile	3.91
IV	16780636	C	T	synonymous_variant	LOW	Y43D4A.5	WBGene00012791	Y43D4A.5c	c.3939C>T	p.Ile1313Ile	3.91
IV	16780636	C	T	synonymous_variant	LOW	Y43D4A.5	WBGene00012791	Y43D4A.5d	c.1173C>T	p.Ile391Ile	3.91
IV	7595254	A	G	missense_variant	MODERATE	tag-80	WBGene00018468	F45E4.3a	c.5555A>G	p.Glu1852Gly	3.86
IV	7595254	A	G	missense_variant	MODERATE	tag-80	WBGene00018468	F45E4.3b	c.5555A>G	p.Glu1852Gly	3.86
X	15228297	A	G	synonymous_variant	LOW	H03A11.2	WBGene00010357	H03A11.2	c.1722T>C	p.Asn574Asn	3.84
IV	7592640	G	A	missense_variant	MODERATE	tag-80	WBGene00018468	F45E4.3a	c.2941G>A	p.Val981Ile	3.83
IV	7592640	G	A	missense_variant	MODERATE	tag-80	WBGene00018468	F45E4.3b	c.2941G>A	p.Val981Ile	3.83
IV	7595255	A	T	missense_variant	MODERATE	tag-80	WBGene00018468	F45E4.3a	c.5556A>T	p.Glu1852Asp	3.81
IV	7595255	A	T	missense_variant	MODERATE	tag-80	WBGene00018468	F45E4.3b	c.5556A>T	p.Glu1852Asp	3.81
IV	7591892	A	G	synonymous_variant	LOW	tag-80	WBGene00018468	F45E4.3a	c.2193A>G	p.Ser731Ser	3.74
IV	7591892	A	G	synonymous_variant	LOW	tag-80	WBGene00018468	F45E4.3b	c.2193A>G	p.Ser731Ser	3.74
IV	7595545	C	T	missense_variant	MODERATE	tag-80	WBGene00018468	F45E4.3a	c.5846C>T	p.Ser1949Leu	3.72
IV	7595545	C	T	missense_variant	MODERATE	tag-80	WBGene00018468	F45E4.3b	c.5846C>T	p.Ser1949Leu	3.72
V	6181278	G	T	synonymous_variant	LOW	ttn-1	WBGene00006436	W06H8.8g	c.15858C>A	p.Ser5286Ser	3.72
V	6181278	G	T	synonymous_variant	LOW	ttn-1	WBGene00006436	W06H8.8e.2	c.15858C>A	p.Ser5286Ser	3.72
V	6181278	G	T	synonymous_variant	LOW	ttn-1	WBGene00006436	W06H8.8f.2	c.15858C>A	p.Ser5286Ser	3.72
V	6181278	G	T	synonymous_variant	LOW	ttn-1	WBGene00006436	W06H8.8e.1	c.15858C>A	p.Ser5286Ser	3.72
V	6181278	G	T	synonymous_variant	LOW	ttn-1	WBGene00006436	W06H8.8f.1	c.15858C>A	p.Ser5286Ser	3.72
V	6181278	G	T	synonymous_variant	LOW	ttn-1	WBGene00006436	W06H8.8d	c.15858C>A	p.Ser5286Ser	3.72
V	6181284	C	T	synonymous_variant	LOW	ttn-1	WBGene00006436	W06H8.8g	c.15852G>A	p.Val5284Val	3.72
V	6181284	C	T	synonymous_variant	LOW	ttn-1	WBGene00006436	W06H8.8e.2	c.15852G>A	p.Val5284Val	3.72
V	6181284	C	T	synonymous_variant	LOW	ttn-1	WBGene00006436	W06H8.8f.2	c.15852G>A	p.Val5284Val	3.72
V	6181284	C	T	synonymous_variant	LOW	ttn-1	WBGene00006436	W06H8.8e.1	c.15852G>A	p.Val5284Val	3.72
V	6181284	C	T	synonymous_variant	LOW	ttn-1	WBGene00006436	W06H8.8f.1	c.15852G>A	p.Val5284Val	3.72
V	6181284	C	T	synonymous_variant	LOW	ttn-1	WBGene00006436	W06H8.8d	c.15852G>A	p.Val5284Val	3.72
V	8702240	T	C	missense_variant	MODERATE	ZC178.1	WBGene00022535	ZC178.1	c.809T>C	p.Val270Ala	3.71
IV	12910732	G	T	synonymous_variant	LOW	K08D8.5	WBGene00010659	K08D8.5	c.963C>A	p.Thr321Thr	3.66
II	11215570	G	A	synonymous_variant	LOW	srap-1	WBGene00011522	T06D8.1a	c.7398G>A	p.Lys2466Lys	3.64
II	11215570	G	A	synonymous_variant	LOW	srap-1	WBGene00011522	T06D8.1b	c.7398G>A	p.Lys2466Lys	3.64
II	11215570	G	A	synonymous_variant	LOW	srap-1	WBGene00011522	T06D8.1c	c.6786G>A	p.Lys2262Lys	3.64
I	5162917	A	T	stop_gained	HIGH	let-630	WBGene00002804	Y110A7A.19	c.1764T>A	p.Tyr588*	3.56
V	8702247	G	A	synonymous_variant	LOW	ZC178.1	WBGene00022535	ZC178.1	c.816G>A	p.Glu272Glu	3.5
V	6180801	C	T	synonymous_variant	LOW	ttn-1	WBGene00006436	W06H8.8g	c.16335G>A	p.Val5445Val	3.42
V	6180801	C	T	synonymous_variant	LOW	ttn-1	WBGene00006436	W06H8.8e.2	c.16335G>A	p.Val5445Val	3.42
V	6180801	C	T	synonymous_variant	LOW	ttn-1	WBGene00006436	W06H8.8f.2	c.16335G>A	p.Val5445Val	3.42
V	6180801	C	T	synonymous_variant	LOW	ttn-1	WBGene00006436	W06H8.8e.1	c.16335G>A	p.Val5445Val	3.42
V	6180801	C	T	synonymous_variant	LOW	ttn-1	WBGene00006436	W06H8.8f.1	c.16335G>A	p.Val5445Val	3.42
V	6180801	C	T	synonymous_variant	LOW	ttn-1	WBGene00006436	W06H8.8d	c.16275G>A	p.Val5425Val	3.42
X	8846738	G	A	stop_gained	HIGH	C28G1.t2	WBGene00022948	C28G1.t2	c.18G>A	p.Trp6*	3.42
IV	7596018	T	C	missense_variant	MODERATE	tag-80	WBGene00018468	F45E4.3a	c.6319T>C	p.Ser2107Pro	3.4
IV	7596018	T	C	missense_variant	MODERATE	tag-80	WBGene00018468	F45E4.3b	c.6319T>C	p.Ser2107Pro	3.4
V	17116118	T	G	missense_variant	MODERATE	ZK218.8	WBGene00013942	ZK218.8	c.93T>G	p.Asp31Glu	3.4
X	1553896	A	G	missense_variant	MODERATE	K06A9.1	WBGene00019435	K06A9.1b	c.4867A>G	p.Thr1623Ala	3.36
I	618563	C	G	missense_variant	MODERATE	sago-2	WBGene00018921	F56A6.1a	c.300C>G	p.Asn100Lys	3.28
I	618563	C	G	missense_variant	MODERATE	sago-2	WBGene00018921	F56A6.1b	c.300C>G	p.Asn100Lys	3.28
I	10269317	G	A	synonymous_variant	LOW	ZC247.1	WBGene00013859	ZC247.1	c.8634C>T	p.Ser2878Ser	3.26
IV	16780628	C	G	missense_variant	MODERATE	Y43D4A.5	WBGene00012791	Y43D4A.5a	c.3931C>G	p.Gln1311Glu	3.17
IV	16780628	C	G	missense_variant	MODERATE	Y43D4A.5	WBGene00012791	Y43D4A.5b	c.1165C>G	p.Gln389Glu	3.17
IV	16780628	C	G	missense_variant	MODERATE	Y43D4A.5	WBGene00012791	Y43D4A.5c	c.3931C>G	p.Gln1311Glu	3.17
IV	16780628	C	G	missense_variant	MODERATE	Y43D4A.5	WBGene00012791	Y43D4A.5d	c.1165C>G	p.Gln389Glu	3.17
IV	16780629	A	G	missense_variant	MODERATE	Y43D4A.5	WBGene00012791	Y43D4A.5a	c.3932A>G	p.Gln1311Arg	3.17
IV	16780629	A	G	missense_variant	MODERATE	Y43D4A.5	WBGene00012791	Y43D4A.5b	c.1166A>G	p.Gln389Arg	3.17
IV	16780629	A	G	missense_variant	MODERATE	Y43D4A.5	WBGene00012791	Y43D4A.5c	c.3932A>G	p.Gln1311Arg	3.17
IV	16780629	A	G	missense_variant	MODERATE	Y43D4A.5	WBGene00012791	Y43D4A.5d	c.1166A>G	p.Gln389Arg	3.17
IV	7598486	T	C	missense_variant	MODERATE	tag-80	WBGene00018468	F45E4.3a	c.8720T>C	p.Val2907Ala	3.13
IV	7598486	T	C	missense_variant	MODERATE	tag-80	WBGene00018468	F45E4.3b	c.8720T>C	p.Val2907Ala	3.13
V	14108953	C	T	synonymous_variant	LOW	H39E23.3	WBGene00044201	H39E23.3	c.1143C>T	p.Ser381Ser	3.1
X	3304505	A	T	synonymous_variant	LOW	F11D5.7	WBGene00043980	F11D5.7	c.75A>T	p.Ile25Ile	3.08
III	10907844	C	T	synonymous_variant	LOW	unc-119	WBGene00006843	M142.1c	c.312C>T	p.Asp104Asp	3.05
III	10907844	C	T	synonymous_variant	LOW	unc-119	WBGene00006843	M142.1a	c.237C>T	p.Asp79Asp	3.05
III	10907844	C	T	synonymous_variant	LOW	unc-119	WBGene00006843	M142.1b	c.177C>T	p.Asp59Asp	3.05
I	10270456	T	G	missense_variant	MODERATE	ZC247.1	WBGene00013859	ZC247.1	c.7495A>C	p.Ser2499Arg	3.03
IV	16780617	A	C	missense_variant	MODERATE	Y43D4A.5	WBGene00012791	Y43D4A.5a	c.3920A>C	p.Asp1307Ala	2.95
IV	16780617	A	C	missense_variant	MODERATE	Y43D4A.5	WBGene00012791	Y43D4A.5b	c.1154A>C	p.Asp385Ala	2.95
IV	16780617	A	C	missense_variant	MODERATE	Y43D4A.5	WBGene00012791	Y43D4A.5c	c.3920A>C	p.Asp1307Ala	2.95
IV	16780617	A	C	missense_variant	MODERATE	Y43D4A.5	WBGene00012791	Y43D4A.5d	c.1154A>C	p.Asp385Ala	2.95
I	10273467	G	T	missense_variant	MODERATE	ZC247.1	WBGene00013859	ZC247.1	c.4484C>A	p.Thr1495Asn	2.9
III	10907847	C	G	synonymous_variant	LOW	unc-119	WBGene00006843	M142.1c	c.315C>G	p.Leu105Leu	2.88
III	10907847	C	G	synonymous_variant	LOW	unc-119	WBGene00006843	M142.1a	c.240C>G	p.Leu80Leu	2.88
III	10907847	C	G	synonymous_variant	LOW	unc-119	WBGene00006843	M142.1b	c.180C>G	p.Leu60Leu	2.88
III	10907890	G	C	missense_variant	MODERATE	unc-119	WBGene00006843	M142.1c	c.358G>C	p.Glu120Gln	2.88
III	10907890	G	C	missense_variant	MODERATE	unc-119	WBGene00006843	M142.1a	c.283G>C	p.Glu95Gln	2.88
III	10907890	G	C	missense_variant	MODERATE	unc-119	WBGene00006843	M142.1b	c.223G>C	p.Glu75Gln	2.88
I	12027227	A	G	missense_variant	MODERATE	Y53C10A.10	WBGene00013138	Y53C10A.10	c.3701A>G	p.Asn1234Ser	2.86
X	15228426	C	A	missense_variant	MODERATE	H03A11.2	WBGene00010357	H03A11.2	c.1593G>T	p.Gln531His	2.81
X	3304497	A	T	missense_variant	MODERATE	F11D5.7	WBGene00043980	F11D5.7	c.67A>T	p.Thr23Ser	2.8
X	3304499	G	A	synonymous_variant	LOW	F11D5.7	WBGene00043980	F11D5.7	c.69G>A	p.Thr23Thr	2.8
V	8702193	G	A	synonymous_variant	LOW	ZC178.1	WBGene00022535	ZC178.1	c.762G>A	p.Leu254Leu	2.75
V	8702295	G	A	synonymous_variant	LOW	ZC178.1	WBGene00022535	ZC178.1	c.864G>A	p.Gly288Gly	2.69
III	10907806	G	A	missense_variant	MODERATE	unc-119	WBGene00006843	M142.1c	c.274G>A	p.Val92Ile	2.58
III	10907806	G	A	missense_variant	MODERATE	unc-119	WBGene00006843	M142.1a	c.199G>A	p.Val67Ile	2.58
III	10907806	G	A	missense_variant	MODERATE	unc-119	WBGene00006843	M142.1b	c.139G>A	p.Val47Ile	2.58
III	10907853	G	T	synonymous_variant	LOW	unc-119	WBGene00006843	M142.1c	c.321G>T	p.Thr107Thr	2.58
III	10907853	G	T	synonymous_variant	LOW	unc-119	WBGene00006843	M142.1a	c.246G>T	p.Thr82Thr	2.58
III	10907853	G	T	synonymous_variant	LOW	unc-119	WBGene00006843	M142.1b	c.186G>T	p.Thr62Thr	2.58
III	510116	A	C	synonymous_variant	LOW	F30H5.3	WBGene00017937	F30H5.3	c.594T>G	p.Val198Val	2.57
IV	7595827	C	T	missense_variant	MODERATE	tag-80	WBGene00018468	F45E4.3a	c.6128C>T	p.Ser2043Leu	2.55
IV	7595827	C	T	missense_variant	MODERATE	tag-80	WBGene00018468	F45E4.3b	c.6128C>T	p.Ser2043Leu	2.55
X	3304479	C	T	missense_variant	MODERATE	F11D5.7	WBGene00043980	F11D5.7	c.49C>T	p.Leu17Phe	2.55
X	3304481	T	G	synonymous_variant	LOW	F11D5.7	WBGene00043980	F11D5.7	c.51T>G	p.Leu17Leu	2.55
X	3304482	C	T	missense_variant	MODERATE	F11D5.7	WBGene00043980	F11D5.7	c.52C>T	p.Leu18Phe	2.55
V	6178319	C	T	missense_variant	MODERATE	ttn-1	WBGene00006436	W06H8.8g	c.18817G>A	p.Glu6273Lys	2.52
V	6178319	C	T	missense_variant	MODERATE	ttn-1	WBGene00006436	W06H8.8e.2	c.18817G>A	p.Glu6273Lys	2.52
V	6178319	C	T	missense_variant	MODERATE	ttn-1	WBGene00006436	W06H8.8f.2	c.18817G>A	p.Glu6273Lys	2.52
V	6178319	C	T	missense_variant	MODERATE	ttn-1	WBGene00006436	W06H8.8e.1	c.18817G>A	p.Glu6273Lys	2.52
V	6178319	C	T	missense_variant	MODERATE	ttn-1	WBGene00006436	W06H8.8f.1	c.18817G>A	p.Glu6273Lys	2.52
V	6178319	C	T	missense_variant	MODERATE	ttn-1	WBGene00006436	W06H8.8d	c.18757G>A	p.Glu6253Lys	2.52
IV	7598459	C	A	missense_variant	MODERATE	tag-80	WBGene00018468	F45E4.3a	c.8693C>A	p.Thr2898Lys	2.51
IV	7598459	C	A	missense_variant	MODERATE	tag-80	WBGene00018468	F45E4.3b	c.8693C>A	p.Thr2898Lys	2.51
V	8702303	T	G	missense_variant	MODERATE	ZC178.1	WBGene00022535	ZC178.1	c.872T>G	p.Leu291Arg	2.47
III	10907856	A	G	synonymous_variant	LOW	unc-119	WBGene00006843	M142.1c	c.324A>G	p.Glu108Glu	2.44
III	10907856	A	G	synonymous_variant	LOW	unc-119	WBGene00006843	M142.1a	c.249A>G	p.Glu83Glu	2.44
III	10907856	A	G	synonymous_variant	LOW	unc-119	WBGene00006843	M142.1b	c.189A>G	p.Glu63Glu	2.44
III	10907859	C	A	missense_variant	MODERATE	unc-119	WBGene00006843	M142.1c	c.327C>A	p.His109Gln	2.44
III	10907859	C	A	missense_variant	MODERATE	unc-119	WBGene00006843	M142.1a	c.252C>A	p.His84Gln	2.44
III	10907859	C	A	missense_variant	MODERATE	unc-119	WBGene00006843	M142.1b	c.192C>A	p.His64Gln	2.44
III	10907874	T	C	synonymous_variant	LOW	unc-119	WBGene00006843	M142.1c	c.342T>C	p.Ile114Ile	2.44
III	10907874	T	C	synonymous_variant	LOW	unc-119	WBGene00006843	M142.1a	c.267T>C	p.Ile89Ile	2.44
III	10907874	T	C	synonymous_variant	LOW	unc-119	WBGene00006843	M142.1b	c.207T>C	p.Ile69Ile	2.44
III	10907877	A	C	synonymous_variant	LOW	unc-119	WBGene00006843	M142.1c	c.345A>C	p.Ala115Ala	2.44
III	10907877	A	C	synonymous_variant	LOW	unc-119	WBGene00006843	M142.1a	c.270A>C	p.Ala90Ala	2.44
III	10907877	A	C	synonymous_variant	LOW	unc-119	WBGene00006843	M142.1b	c.210A>C	p.Ala70Ala	2.44
III	10907802	A	G	synonymous_variant	LOW	unc-119	WBGene00006843	M142.1c	c.270A>G	p.Ala90Ala	2.31
III	10907802	A	G	synonymous_variant	LOW	unc-119	WBGene00006843	M142.1a	c.195A>G	p.Ala65Ala	2.31
III	10907802	A	G	synonymous_variant	LOW	unc-119	WBGene00006843	M142.1b	c.135A>G	p.Ala45Ala	2.31
III	10907865	C	T	synonymous_variant	LOW	unc-119	WBGene00006843	M142.1c	c.333C>T	p.Leu111Leu	2.31
III	10907865	C	T	synonymous_variant	LOW	unc-119	WBGene00006843	M142.1a	c.258C>T	p.Leu86Leu	2.31
III	10907865	C	T	synonymous_variant	LOW	unc-119	WBGene00006843	M142.1b	c.198C>T	p.Leu66Leu	2.31
V	6181519	G	A	missense_variant	MODERATE	ttn-1	WBGene00006436	W06H8.8g	c.15617C>T	p.Thr5206Ile	2.27
V	6181519	G	A	missense_variant	MODERATE	ttn-1	WBGene00006436	W06H8.8e.2	c.15617C>T	p.Thr5206Ile	2.27
V	6181519	G	A	missense_variant	MODERATE	ttn-1	WBGene00006436	W06H8.8f.2	c.15617C>T	p.Thr5206Ile	2.27
V	6181519	G	A	missense_variant	MODERATE	ttn-1	WBGene00006436	W06H8.8e.1	c.15617C>T	p.Thr5206Ile	2.27
V	6181519	G	A	missense_variant	MODERATE	ttn-1	WBGene00006436	W06H8.8f.1	c.15617C>T	p.Thr5206Ile	2.27
V	6181519	G	A	missense_variant	MODERATE	ttn-1	WBGene00006436	W06H8.8d	c.15617C>T	p.Thr5206Ile	2.27
IV	7727408	G	A	synonymous_variant	LOW	C50F7.5	WBGene00016845	C50F7.5	c.690G>A	p.Gly230Gly	2.23
IV	7591939	A	G	missense_variant	MODERATE	tag-80	WBGene00018468	F45E4.3a	c.2240A>G	p.Lys747Arg	2.21
IV	7591939	A	G	missense_variant	MODERATE	tag-80	WBGene00018468	F45E4.3b	c.2240A>G	p.Lys747Arg	2.21
V	8708175	G	A	missense_variant	MODERATE	ZC178.2	WBGene00022536	ZC178.2	c.1706C>T	p.Ser569Phe	2.19
III	10907871	A	G	synonymous_variant	LOW	unc-119	WBGene00006843	M142.1c	c.339A>G	p.Glu113Glu	2.18
III	10907871	A	G	synonymous_variant	LOW	unc-119	WBGene00006843	M142.1a	c.264A>G	p.Glu88Glu	2.18
III	10907871	A	G	synonymous_variant	LOW	unc-119	WBGene00006843	M142.1b	c.204A>G	p.Glu68Glu	2.18
III	10907817	T	C	synonymous_variant	LOW	unc-119	WBGene00006843	M142.1c	c.285T>C	p.Ile95Ile	2.07
III	10907817	T	C	synonymous_variant	LOW	unc-119	WBGene00006843	M142.1a	c.210T>C	p.Ile70Ile	2.07
III	10907817	T	C	synonymous_variant	LOW	unc-119	WBGene00006843	M142.1b	c.150T>C	p.Ile50Ile	2.07
IV	7592549	T	C	synonymous_variant	LOW	tag-80	WBGene00018468	F45E4.3a	c.2850T>C	p.Ser950Ser	2.01
IV	7592549	T	C	synonymous_variant	LOW	tag-80	WBGene00018468	F45E4.3b	c.2850T>C	p.Ser950Ser	2.01
IV	11145032	A	G	missense_variant	MODERATE	F01G4.4	WBGene00008503	F01G4.4b	c.1490A>G	p.Gln497Arg	1.94
IV	11145032	A	G	missense_variant	MODERATE	F01G4.4	WBGene00008503	F01G4.4a	c.1490A>G	p.Gln497Arg	1.94
IV	11145033	A	G	synonymous_variant	LOW	F01G4.4	WBGene00008503	F01G4.4b	c.1491A>G	p.Gln497Gln	1.94
IV	11145033	A	G	synonymous_variant	LOW	F01G4.4	WBGene00008503	F01G4.4a	c.1491A>G	p.Gln497Gln	1.94
II	11215577	C	A	missense_variant	MODERATE	srap-1	WBGene00011522	T06D8.1a	c.7405C>A	p.Gln2469Lys	1.91
II	11215577	C	A	missense_variant	MODERATE	srap-1	WBGene00011522	T06D8.1b	c.7405C>A	p.Gln2469Lys	1.91
II	11215577	C	A	missense_variant	MODERATE	srap-1	WBGene00011522	T06D8.1c	c.6793C>A	p.Gln2265Lys	1.91
III	10907829	A	G	synonymous_variant	LOW	unc-119	WBGene00006843	M142.1c	c.297A>G	p.Lys99Lys	1.88
III	10907829	A	G	synonymous_variant	LOW	unc-119	WBGene00006843	M142.1a	c.222A>G	p.Lys74Lys	1.88
III	10907829	A	G	synonymous_variant	LOW	unc-119	WBGene00006843	M142.1b	c.162A>G	p.Lys54Lys	1.88
II	7869941	G	T	missense_variant	MODERATE	ztf-17	WBGene00011639	T09A5.12.1	c.109C>A	p.Gln37Lys	1.87
II	7869941	G	T	missense_variant	MODERATE	ztf-17	WBGene00011639	T09A5.12.2	c.109C>A	p.Gln37Lys	1.87
I	10267042	G	A	synonymous_variant	LOW	ZC247.1	WBGene00013859	ZC247.1	c.10909C>T	p.Leu3637Leu	1.86
IV	7591424	A	G	synonymous_variant	LOW	tag-80	WBGene00018468	F45E4.3a	c.1725A>G	p.Lys575Lys	1.8
IV	7591424	A	G	synonymous_variant	LOW	tag-80	WBGene00018468	F45E4.3b	c.1725A>G	p.Lys575Lys	1.8
V	6181415	T	G	missense_variant	MODERATE	ttn-1	WBGene00006436	W06H8.8g	c.15721A>C	p.Lys5241Gln	1.78
V	6181415	T	G	missense_variant	MODERATE	ttn-1	WBGene00006436	W06H8.8e.2	c.15721A>C	p.Lys5241Gln	1.78
V	6181415	T	G	missense_variant	MODERATE	ttn-1	WBGene00006436	W06H8.8f.2	c.15721A>C	p.Lys5241Gln	1.78
V	6181415	T	G	missense_variant	MODERATE	ttn-1	WBGene00006436	W06H8.8e.1	c.15721A>C	p.Lys5241Gln	1.78
V	6181415	T	G	missense_variant	MODERATE	ttn-1	WBGene00006436	W06H8.8f.1	c.15721A>C	p.Lys5241Gln	1.78
V	6181415	T	G	missense_variant	MODERATE	ttn-1	WBGene00006436	W06H8.8d	c.15721A>C	p.Lys5241Gln	1.78
I	10275425	A	T	synonymous_variant	LOW	ZC247.1	WBGene00013859	ZC247.1	c.2526T>A	p.Ser842Ser	1.69
I	10275206	C	T	synonymous_variant	LOW	ZC247.1	WBGene00013859	ZC247.1	c.2745G>A	p.Lys915Lys	1.59
I	5163128	T	G	synonymous_variant	LOW	let-630	WBGene00002804	Y110A7A.19	c.1605A>C	p.Thr535Thr	1.58
I	10270550	A	T	missense_variant	MODERATE	ZC247.1	WBGene00013859	ZC247.1	c.7401T>A	p.Asp2467Glu	1.57
I	10276596	C	T	synonymous_variant	LOW	ZC247.1	WBGene00013859	ZC247.1	c.1395G>A	p.Lys465Lys	1.52
V	6176688	T	A	missense_variant	MODERATE	ttn-1	WBGene00006436	W06H8.8g	c.20448A>T	p.Glu6816Asp	1.45
V	6176688	T	A	missense_variant	MODERATE	ttn-1	WBGene00006436	W06H8.8e.2	c.20448A>T	p.Glu6816Asp	1.45
V	6176688	T	A	missense_variant	MODERATE	ttn-1	WBGene00006436	W06H8.8f.2	c.20448A>T	p.Glu6816Asp	1.45
V	6176688	T	A	missense_variant	MODERATE	ttn-1	WBGene00006436	W06H8.8e.1	c.20448A>T	p.Glu6816Asp	1.45
V	6176688	T	A	missense_variant	MODERATE	ttn-1	WBGene00006436	W06H8.8f.1	c.20448A>T	p.Glu6816Asp	1.45
V	6176688	T	A	missense_variant	MODERATE	ttn-1	WBGene00006436	W06H8.8d	c.20388A>T	p.Glu6796Asp	1.45
I	10266681	A	G	missense_variant	MODERATE	ZC247.1	WBGene00013859	ZC247.1	c.11270T>C	p.Leu3757Ser	1.44
V	6176692	C	A	missense_variant	MODERATE	ttn-1	WBGene00006436	W06H8.8g	c.20444G>T	p.Gly6815Val	1.43
V	6176692	C	A	missense_variant	MODERATE	ttn-1	WBGene00006436	W06H8.8e.2	c.20444G>T	p.Gly6815Val	1.43
V	6176692	C	A	missense_variant	MODERATE	ttn-1	WBGene00006436	W06H8.8f.2	c.20444G>T	p.Gly6815Val	1.43
V	6176692	C	A	missense_variant	MODERATE	ttn-1	WBGene00006436	W06H8.8e.1	c.20444G>T	p.Gly6815Val	1.43
V	6176692	C	A	missense_variant	MODERATE	ttn-1	WBGene00006436	W06H8.8f.1	c.20444G>T	p.Gly6815Val	1.43
V	6176692	C	A	missense_variant	MODERATE	ttn-1	WBGene00006436	W06H8.8d	c.20384G>T	p.Gly6795Val	1.43
IV	7595015	C	T	synonymous_variant	LOW	tag-80	WBGene00018468	F45E4.3a	c.5316C>T	p.Ser1772Ser	1.42
IV	7595015	C	T	synonymous_variant	LOW	tag-80	WBGene00018468	F45E4.3b	c.5316C>T	p.Ser1772Ser	1.42
V	6178304	C	G	missense_variant	MODERATE	ttn-1	WBGene00006436	W06H8.8g	c.18832G>C	p.Glu6278Gln	1.39
V	6178304	C	G	missense_variant	MODERATE	ttn-1	WBGene00006436	W06H8.8e.2	c.18832G>C	p.Glu6278Gln	1.39
V	6178304	C	G	missense_variant	MODERATE	ttn-1	WBGene00006436	W06H8.8f.2	c.18832G>C	p.Glu6278Gln	1.39
V	6178304	C	G	missense_variant	MODERATE	ttn-1	WBGene00006436	W06H8.8e.1	c.18832G>C	p.Glu6278Gln	1.39
V	6178304	C	G	missense_variant	MODERATE	ttn-1	WBGene00006436	W06H8.8f.1	c.18832G>C	p.Glu6278Gln	1.39
V	6178304	C	G	missense_variant	MODERATE	ttn-1	WBGene00006436	W06H8.8d	c.18772G>C	p.Glu6258Gln	1.39
IV	7595018	C	T	synonymous_variant	LOW	tag-80	WBGene00018468	F45E4.3a	c.5319C>T	p.Phe1773Phe	1.33
IV	7595018	C	T	synonymous_variant	LOW	tag-80	WBGene00018468	F45E4.3b	c.5319C>T	p.Phe1773Phe	1.33
III	10907799	G	T	synonymous_variant	LOW	unc-119	WBGene00006843	M142.1c	c.267G>T	p.Ser89Ser	1.32
III	10907799	G	T	synonymous_variant	LOW	unc-119	WBGene00006843	M142.1a	c.192G>T	p.Ser64Ser	1.32
III	10907799	G	T	synonymous_variant	LOW	unc-119	WBGene00006843	M142.1b	c.132G>T	p.Ser44Ser	1.32
V	6182391	T	C	synonymous_variant	LOW	ttn-1	WBGene00006436	W06H8.8g	c.14745A>G	p.Ala4915Ala	1.27
V	6182391	T	C	synonymous_variant	LOW	ttn-1	WBGene00006436	W06H8.8e.2	c.14745A>G	p.Ala4915Ala	1.27
V	6182391	T	C	synonymous_variant	LOW	ttn-1	WBGene00006436	W06H8.8f.2	c.14745A>G	p.Ala4915Ala	1.27
V	6182391	T	C	synonymous_variant	LOW	ttn-1	WBGene00006436	W06H8.8e.1	c.14745A>G	p.Ala4915Ala	1.27
V	6182391	T	C	synonymous_variant	LOW	ttn-1	WBGene00006436	W06H8.8f.1	c.14745A>G	p.Ala4915Ala	1.27
V	6182391	T	C	synonymous_variant	LOW	ttn-1	WBGene00006436	W06H8.8d	c.14745A>G	p.Ala4915Ala	1.27
IV	7594360	G	A	missense_variant	MODERATE	tag-80	WBGene00018468	F45E4.3a	c.4661G>A	p.Arg1554Gln	1.23
IV	7594360	G	A	missense_variant	MODERATE	tag-80	WBGene00018468	F45E4.3b	c.4661G>A	p.Arg1554Gln	1.23
I	12027239	A	G	missense_variant	MODERATE	Y53C10A.10	WBGene00013138	Y53C10A.10	c.3713A>G	p.Glu1238Gly	1.21
II	7152969	T	A	missense_variant	MODERATE	fust-1	WBGene00016173	C27H5.3.1	c.70T>A	p.Tyr24Asn	1.21
II	7152969	T	A	missense_variant	MODERATE	fust-1	WBGene00016173	C27H5.3.2	c.70T>A	p.Tyr24Asn	1.21
II	7152970	A	T	missense_variant	MODERATE	fust-1	WBGene00016173	C27H5.3.1	c.71A>T	p.Tyr24Phe	1.21
II	7152970	A	T	missense_variant	MODERATE	fust-1	WBGene00016173	C27H5.3.2	c.71A>T	p.Tyr24Phe	1.21
II	7152994	C	A	missense_variant	MODERATE	fust-1	WBGene00016173	C27H5.3.1	c.95C>A	p.Pro32Gln	1.11
II	7152994	C	A	missense_variant	MODERATE	fust-1	WBGene00016173	C27H5.3.2	c.95C>A	p.Pro32Gln	1.11
V	6178395	C	A	missense_variant	MODERATE	ttn-1	WBGene00006436	W06H8.8g	c.18741G>T	p.Lys6247Asn	1.06
V	6178395	C	A	missense_variant	MODERATE	ttn-1	WBGene00006436	W06H8.8e.2	c.18741G>T	p.Lys6247Asn	1.06
V	6178395	C	A	missense_variant	MODERATE	ttn-1	WBGene00006436	W06H8.8f.2	c.18741G>T	p.Lys6247Asn	1.06
V	6178395	C	A	missense_variant	MODERATE	ttn-1	WBGene00006436	W06H8.8e.1	c.18741G>T	p.Lys6247Asn	1.06
V	6178395	C	A	missense_variant	MODERATE	ttn-1	WBGene00006436	W06H8.8f.1	c.18741G>T	p.Lys6247Asn	1.06
V	6178395	C	A	missense_variant	MODERATE	ttn-1	WBGene00006436	W06H8.8d	c.18681G>T	p.Lys6227Asn	1.06
IV	7595722	T	C	missense_variant	MODERATE	tag-80	WBGene00018468	F45E4.3a	c.6023T>C	p.Leu2008Ser	1.04
IV	7595722	T	C	missense_variant	MODERATE	tag-80	WBGene00018468	F45E4.3b	c.6023T>C	p.Leu2008Ser	1.04
IV	7593749	A	T	synonymous_variant	LOW	tag-80	WBGene00018468	F45E4.3a	c.4050A>T	p.Ser1350Ser	0.96
IV	7593749	A	T	synonymous_variant	LOW	tag-80	WBGene00018468	F45E4.3b	c.4050A>T	p.Ser1350Ser	0.96
I	10274276	T	A	synonymous_variant	LOW	ZC247.1	WBGene00013859	ZC247.1	c.3675A>T	p.Ser1225Ser	0.93
I	10275180	G	C	missense_variant	MODERATE	ZC247.1	WBGene00013859	ZC247.1	c.2771C>G	p.Pro924Arg	0.79
IV	7591406	A	T	missense_variant	MODERATE	tag-80	WBGene00018468	F45E4.3a	c.1707A>T	p.Glu569Asp	0.74
IV	7591406	A	T	missense_variant	MODERATE	tag-80	WBGene00018468	F45E4.3b	c.1707A>T	p.Glu569Asp	0.74
IV	7727414	A	G	synonymous_variant	LOW	C50F7.5	WBGene00016845	C50F7.5	c.696A>G	p.Val232Val	0.67
IV	7595203	T	C	missense_variant	MODERATE	tag-80	WBGene00018468	F45E4.3a	c.5504T>C	p.Val1835Ala	0.55
IV	7595203	T	C	missense_variant	MODERATE	tag-80	WBGene00018468	F45E4.3b	c.5504T>C	p.Val1835Ala	0.55
I	10270934	G	A	synonymous_variant	LOW	ZC247.1	WBGene00013859	ZC247.1	c.7017C>T	p.Ser2339Ser	0.32

## Sheet: 7. CFJ77 - indels
Chr	Positions	Ref	Alt	Type	Impact	Gene	WBGene	Transcript	Change	AA change	quality by depth (~12 = hetrozygous, ~30 = homozygous)
III	5762085	G	GC	frameshift_variant	HIGH	B0244.t3	WBGene00022899	B0244.t3	c.41dupG	p.Gly15fs	35.08
X	6357781	C	CCCAT	frameshift_variant	HIGH	C03B1.10	WBGene00015380	C03B1.10	c.88_91dupATGG	p.Gly31fs	34.74
III	5953956	TG	T	frameshift_variant	HIGH	nono-1	WBGene00017778	F25B5.7a	c.1505delC	p.Pro502fs	34.39
III	5953956	TG	T	frameshift_variant	HIGH	nono-1	WBGene00017778	F25B5.7c	c.665delC	p.Pro222fs	34.39
III	5953950	A	AG	frameshift_variant	HIGH	nono-1	WBGene00017778	F25B5.7a	c.1511dupC	p.His505fs	34.07
III	5953950	A	AG	frameshift_variant	HIGH	nono-1	WBGene00017778	F25B5.7c	c.671dupC	p.His225fs	34.07
II	5078783	T	TG	frameshift_variant&splice_region_variant	HIGH	dsh-2	WBGene00001102	C27A2.6	c.1978dupC	p.His660fs	34.04
III	10498224	AT	A	frameshift_variant	HIGH	F43D9.1	WBGene00009653	F43D9.1	c.3093delT	p.Gln1032fs	33.79
I	7781355	T	TCCATCCCGATCCATCCCGATCCATCCCGATCCATCCCGATTCACCTCGATCCATCCCGATCCACCTCGAA	frameshift_variant	HIGH	VH15N14R.1	WBGene00012151	VH15N14R.1	c.463_464insTTCGAGGTGGATCGGGATGGATCGAGGTGAATCGGGATGGATCGGGATGGATCGGGATGGATCGGGATGG	p.Asp155fs	33.53
IV	7053286	AC	A	frameshift_variant	HIGH	nhr-105	WBGene00003695	C06G3.1a.1	c.1214delC	p.Pro405fs	33.44
IV	7053286	AC	A	frameshift_variant	HIGH	nhr-105	WBGene00003695	C06G3.1a.2	c.1214delC	p.Pro405fs	33.44
IV	7053286	AC	A	frameshift_variant	HIGH	nhr-105	WBGene00003695	C06G3.1b.2	c.1166delC	p.Pro389fs	33.44
IV	7053286	AC	A	frameshift_variant	HIGH	nhr-105	WBGene00003695	C06G3.1b.1	c.1166delC	p.Pro389fs	33.44
X	14766703	TG	T	frameshift_variant	HIGH	Y16B4A.2	WBGene00012445	Y16B4A.2	c.3202delC	p.Gln1068fs	33.27
II	7028486	T	TA	splice_region_variant&intron_variant	LOW	C52E12.1	WBGene00016888	C52E12.1	c.2141+2_2141+3insA		33.21
II	6721804	CA	C	frameshift_variant	HIGH	T14B4.t1	WBGene00023138	T14B4.t1	c.41delA	p.Asn14fs	32.64
II	6759299	TC	T	frameshift_variant	HIGH	F41G3.2	WBGene00018299	F41G3.2	c.14delC	p.Pro5fs	32.23
III	9348875	A	AG	splice_region_variant&intron_variant	LOW	K04H4.2	WBGene00010573	K04H4.2c.1	c.3986-8_3986-7insC		32.16
III	9348875	A	AG	splice_region_variant&intron_variant	LOW	K04H4.2	WBGene00010573	K04H4.2b.1	c.1961-8_1961-7insC		32.16
III	9348875	A	AG	splice_region_variant&intron_variant	LOW	K04H4.2	WBGene00010573	K04H4.2b.3	c.1961-8_1961-7insC		32.16
III	9348875	A	AG	splice_region_variant&intron_variant	LOW	K04H4.2	WBGene00010573	K04H4.2c.3	c.3986-8_3986-7insC		32.16
III	9348875	A	AG	splice_region_variant&intron_variant	LOW	K04H4.2	WBGene00010573	K04H4.2b.2	c.1961-8_1961-7insC		32.16
III	9348875	A	AG	splice_region_variant&intron_variant	LOW	K04H4.2	WBGene00010573	K04H4.2c.2	c.3986-8_3986-7insC		32.16
II	1744949	TACAAGTGG	T	frameshift_variant	HIGH	clec-19	WBGene00018105	F36H5.6	c.380_387delCAAGTGGA	p.Thr127fs	32.13
III	4429019	A	AC	frameshift_variant	HIGH	C28A5.t3	WBGene00014269	C28A5.t3	c.5dupG	p.Ile3fs	32.06
X	1417333	A	AAACTCTTTTCCTTTCCTCAGTCACCGCGTTGGGGGGTTTTTCGAAGGTACCTCTAACTTGGTGACTGAGGAAAGGAAAAGAGTTTTTG	frameshift_variant	HIGH	F19G12.4	WBGene00017612	F19G12.4	c.40_41insCTTTCCTCAGTCACCGCGTTGGGGGGTTTTTCGAAGGTACCTCTAACTTGGTGACTGAGGAAAGGAAAAGAGTTTTTGAACTCTTTTC	p.Leu14fs	32.06
V	2227204	TGCCCGCACC	T	conservative_inframe_deletion	MODERATE	nhr-18	WBGene00003617	F44C8.3	c.4_12delCCCGCACCG	p.Pro2_Pro4del	32.01
X	14766693	TG	T	frameshift_variant	HIGH	Y16B4A.2	WBGene00012445	Y16B4A.2	c.3212delC	p.Pro1071fs	31.37
IV	7053292	C	CT	frameshift_variant	HIGH	nhr-105	WBGene00003695	C06G3.1a.1	c.1218dupT	p.Arg407fs	31.26
IV	7053292	C	CT	frameshift_variant	HIGH	nhr-105	WBGene00003695	C06G3.1a.2	c.1218dupT	p.Arg407fs	31.26
IV	7053292	C	CT	frameshift_variant	HIGH	nhr-105	WBGene00003695	C06G3.1b.2	c.1170dupT	p.Arg391fs	31.26
IV	7053292	C	CT	frameshift_variant	HIGH	nhr-105	WBGene00003695	C06G3.1b.1	c.1170dupT	p.Arg391fs	31.26
II	6736533	G	GC	frameshift_variant	HIGH	T14B4.2	WBGene00020499	T14B4.2	c.279_280insC	p.Asn94fs	31.17
II	6736536	CA	C	frameshift_variant	HIGH	T14B4.2	WBGene00020499	T14B4.2	c.284delA	p.Lys95fs	31.15
IV	13203448	GA	G	splice_region_variant&intron_variant	LOW	ced-3	WBGene00000417	C48D1.2a	c.282-5delT		31.15
I	13768982	TGGA	T	disruptive_inframe_deletion	MODERATE	Y6B3B.4	WBGene00012389	Y6B3B.4	c.3297_3299delGGA	p.Glu1100del	31.05
III	9102246	TC	T	frameshift_variant	HIGH	ZK507.3	WBGene00013979	ZK507.3	c.567delC	p.Glu190fs	31.02
II	7124047	C	CG	frameshift_variant	HIGH	F10E7.2	WBGene00017344	F10E7.2	c.386dupG	p.Thr130fs	30.77
IV	12308328	GC	G	frameshift_variant	HIGH	oac-58	WBGene00019580	K09E10.2a	c.2052delG	p.Arg684fs	30.5
II	5078789	G	GC	frameshift_variant	HIGH	dsh-2	WBGene00001102	C27A2.6	c.1972dupG	p.Ala658fs	30.28
V	5084632	TGA	T	frameshift_variant	HIGH	Y58A7A.4	WBGene00021978	Y58A7A.4	c.326_327delTC	p.Val109fs	30.26
V	8063714	C	CTCGACGATGCTCATACTCCA	splice_region_variant&intron_variant	LOW	fbxa-223	WBGene00022630	ZC513.10	c.670+3_670+4insTGGAGTATGAGCATCGTCGA		30.04
IV	13511655	ACAT	A	disruptive_inframe_deletion	MODERATE	puf-3	WBGene00004239	Y45F10A.2	c.416_418delATG	p.Asp139del	29.98
V	6972737	A	AT	splice_region_variant&intron_variant	LOW	srx-59	WBGene00005950	T07H8.3	c.600+7_600+8insT		29.97
I	2905525	TGC	T	frameshift_variant	HIGH	Y71F9AL.4	WBGene00022110	Y71F9AL.4	c.677_678delCG	p.Ala226fs	29.91
X	1615121	GC	G	frameshift_variant	HIGH	H11E01.3	WBGene00019188	H11E01.3	c.2103delC	p.Ser702fs	29.62
X	14766734	CG	C	frameshift_variant	HIGH	Y16B4A.2	WBGene00012445	Y16B4A.2	c.3171delC	p.Gly1058fs	29.54
I	6066247	T	TGATCTCCAATTACAATCAAAA	conservative_inframe_insertion	MODERATE	C27A12.9	WBGene00016159	C27A12.9	c.769_770insTTTTGATTGTAATTGGAGATC	p.Asp256_His257insLeuLeuIleValIleGlyAsp	29.53
V	5625702	CGATCCAAAATCT	C	disruptive_inframe_deletion	MODERATE	acy-4	WBGene00000071	T01C2.1	c.2573_2584delAGATTTTGGATC	p.Gln858_Asp861del	29.43
X	1615129	TC	T	frameshift_variant	HIGH	H11E01.3	WBGene00019188	H11E01.3	c.2109delC	p.Asn704fs	29.21
II	6084945	A	AG	frameshift_variant&splice_region_variant	HIGH	ptc-2	WBGene00004209	F21H12.4	c.863dupC	p.Ser289fs	28.81
II	7698954	C	CG	frameshift_variant	HIGH	moa-2	WBGene00015205	B0495.6	c.79dupC	p.Arg27fs	28.76
II	6737105	TC	T	splice_region_variant&intron_variant	LOW	T14B4.1	WBGene00020498	T14B4.1	c.96-5delC		28.69
V	13647362	C	CATCCCGATCCCGATCCAGCCCGATCCCGATCCATCCCGATCCCGATCCATCCCGATCCATCCCGATCCCGATCCATCCCGATCCCGATCCCGATCCCG	frameshift_variant	HIGH	H37A05.4	WBGene00044200	H37A05.4a	c.527_528insCGGGATCGGGATCGGGATCGGGATGGATCGGGATCGGGATGGATCGGGATGGATCGGGATCGGGATGGATCGGGATCGGGCTGGATCGGGATCGGGAT	p.Met176fs	28.61
V	13647362	C	CATCCCGATCCCGATCCAGCCCGATCCCGATCCATCCCGATCCCGATCCATCCCGATCCATCCCGATCCCGATCCATCCCGATCCCGATCCCGATCCCG	frameshift_variant	HIGH	H37A05.4	WBGene00044200	H37A05.4b	c.527_528insCGGGATCGGGATCGGGATCGGGATGGATCGGGATCGGGATGGATCGGGATGGATCGGGATCGGGATGGATCGGGATCGGGCTGGATCGGGATCGGGAT	p.Met176fs	28.61
V	12167424	C	CCCTGGTGGTCCTGGTGGTCCGGCTGGGCATGTGATGCAAGCAGAAGCAGATGAGTGTTGTTCAGCAACTCCAGCTCCTCCAGCTTGTCCATCACCTCCTGGTTCTCCTGCCTCTCCTGGAGCACCATCCTCT	disruptive_inframe_insertion	MODERATE	col-37	WBGene00000614	ZK863.2	c.329_330insAGAGGATGGTGCTCCAGGAGAGGCAGGAGAACCAGGAGGTGATGGACAAGCTGGAGGAGCTGGAGTTGCTGAACAACACTCATCTGCTTCTGCTTGCATCACATGCCCAGCCGGACCACCAGGACCACCAGG	p.Gly110_Pro111insGluAspGlyAlaProGlyGluAlaGlyGluProGlyGlyAspGlyGlnAlaGlyGlyAlaGlyValAlaGluGlnHisSerSerAlaSerAlaCysIleThrCysProAlaGlyProProGlyProProGly	28.55
IV	15476881	C	CAGA	splice_acceptor_variant&intron_variant	HIGH	Y73F8A.26	WBGene00013531	Y73F8A.26a	c.1258-3_1258-2insAGA		28.54
IV	15476881	C	CAGA	splice_acceptor_variant&intron_variant	HIGH	Y73F8A.26	WBGene00013531	Y73F8A.26b	c.955-3_955-2insAGA		28.54
III	10498230	G	GC	frameshift_variant	HIGH	F43D9.1	WBGene00009653	F43D9.1	c.3096_3097insC	p.Cys1033fs	28.34
V	10394037	ATCCAT	A	frameshift_variant	HIGH	col-151	WBGene00000724	AC3.6	c.523_527delATGGA	p.Met175fs	27.99
X	8639290	A	ACG	frameshift_variant	HIGH	F12D9.t5	WBGene00022990	F12D9.t5	c.4_5dupCG	p.Gly3fs	27.92
V	12166948	G	GC	splice_region_variant&intron_variant	LOW	col-37	WBGene00000614	ZK863.2	c.802+3_802+4insG		27.91
II	11027640	C	CCGTGAAGATCGCCGTGACCGAAGCAAGGATCGGGAGGATCGTCGTGATCGCAGTAAGGATCGAGACGATCGT	disruptive_inframe_insertion	MODERATE	let-858	WBGene00002957	F33A8.1	c.2567_2568insGGAGGATCGTCGTGATCGCAGTAAGGATCGAGACGATCGTCGTGAAGATCGCCGTGACCGAAGCAAGGATCG	p.Arg856_Glu857insGluAspArgArgAspArgSerLysAspArgAspAspArgArgGluAspArgArgAspArgSerLysAspArg	27.77
X	8941404	TGATC	T	frameshift_variant	HIGH	trk-1	WBGene00017039	D1073.1b	c.2510_2513delGATC	p.Arg837fs	27.66
X	8941404	TGATC	T	frameshift_variant	HIGH	trk-1	WBGene00017039	D1073.1a	c.2099_2102delGATC	p.Arg700fs	27.66
X	1615139	TC	T	frameshift_variant	HIGH	H11E01.3	WBGene00019188	H11E01.3	c.2119delC	p.His707fs	27.37
II	7697469	G	GC	frameshift_variant	HIGH	B0495.5	WBGene00015204	B0495.5.1	c.823_824insG	p.Ser275fs	27.05
II	7697469	G	GC	frameshift_variant	HIGH	B0495.5	WBGene00015204	B0495.5.2	c.823_824insG	p.Ser275fs	27.05
V	15432432	C	CTCGAGTATGCTGAA	frameshift_variant	HIGH	T26H5.8	WBGene00012070	T26H5.8.1	c.5_6insTTCAGCATACTCGA	p.Glu2fs	26.59
V	15432432	C	CTCGAGTATGCTGAA	frameshift_variant	HIGH	T26H5.8	WBGene00012070	T26H5.8.4	c.5_6insTTCAGCATACTCGA	p.Glu2fs	26.59
V	15432432	C	CTCGAGTATGCTGAA	frameshift_variant	HIGH	T26H5.8	WBGene00012070	T26H5.8.2	c.5_6insTTCAGCATACTCGA	p.Glu2fs	26.59
V	15432432	C	CTCGAGTATGCTGAA	frameshift_variant	HIGH	T26H5.8	WBGene00012070	T26H5.8.3	c.5_6insTTCAGCATACTCGA	p.Glu2fs	26.59
V	5084639	G	GAA	frameshift_variant	HIGH	Y58A7A.4	WBGene00021978	Y58A7A.4	c.320_321insTT	p.Val109fs	26.58
V	1646957	C	CGAACCGGTTTGTTCATCGCCCAGCCACTCTTCTTCCAGCAACTCCACCTGGCGCAGCAGTGCCAGCAGTTTTTGCCCTTGTTCCGTCGGGCGCGGCGGTA	frameshift_variant	HIGH	alh-2	WBGene00000108	K04F1.15	c.821_822insGAACCGGTTTGTTCATCGCCCAGCCACTCTTCTTCCAGCAACTCCACCTGGCGCAGCAGTGCCAGCAGTTTTTGCCCTTGTTCCGTCGGGCGCGGCGGTA	p.Val276fs	26.22
X	155403	C	CA	splice_region_variant&intron_variant	LOW	Y73B3A.10	WBGene00022212	Y73B3A.10	c.85-5_85-4insT		26.12
II	7698960	G	GC	frameshift_variant	HIGH	moa-2	WBGene00015205	B0495.6	c.73dupG	p.Ala25fs	26
II	7697471	TC	T	frameshift_variant	HIGH	B0495.5	WBGene00015204	B0495.5.1	c.821delG	p.Gly274fs	25.82
II	7697471	TC	T	frameshift_variant	HIGH	B0495.5	WBGene00015204	B0495.5.2	c.821delG	p.Gly274fs	25.82
I	238082	G	GTTGGTGGTCGC	frameshift_variant	HIGH	Y48G1BM.6	WBGene00021671	Y48G1BM.6	c.170_171insGCGACCACCAA	p.Phe58fs	25.69
I	12299416	G	GAATTGATCTACTGAAACCAAGAGAAT	frameshift_variant&stop_gained	HIGH	F56H6.7	WBGene00010168	F56H6.7	c.1316_1317insGATCTACTGAAACCAAGAGAATAATT	p.Phe439fs	25.49
II	4408048	CGCGTGGA	C	frameshift_variant	HIGH	ZK430.5	WBGene00022741	ZK430.5	c.692_698delGCGTGGA	p.Arg231fs	25.49
X	15748079	C	CG	frameshift_variant	HIGH	ZK678.t2	WBGene00014627	ZK678.t2	c.51dupG	p.Phe18fs	24.95
V	13647423	T	TTCGTCG	conservative_inframe_insertion	MODERATE	H37A05.4	WBGene00044200	H37A05.4a	c.461_466dupCGACGA	p.Thr154_Thr155dup	24.89
V	13647423	T	TTCGTCG	conservative_inframe_insertion	MODERATE	H37A05.4	WBGene00044200	H37A05.4b	c.461_466dupCGACGA	p.Thr154_Thr155dup	24.89
II	2141129	A	AAGTCAATCTAGTCCCGGACTTTAAATCGAGACGT	frameshift_variant&start_lost	HIGH	C40A11.3	WBGene00016546	C40A11.3	c.1_2insGTCAATCTAGTCCCGGACTTTAAATCGAGACGTA	p.Met1fs	24.08
V	15688539	G	GT	splice_region_variant&intron_variant	LOW	nhr-197	WBGene00010602	K06B4.7	c.396+5_396+6insT		24
IV	2961082	TCC	T,TC	splice_region_variant&intron_variant	LOW	ser-6	WBGene00021897	Y54G2A.35a	c.347+8_347+9delCC		23.9
IV	2961082	TCC	T,TC	splice_region_variant&intron_variant	LOW	ser-6	WBGene00021897	Y54G2A.35b	c.347+8_347+9delCC		23.9
I	238051	A	AT	splice_region_variant&intron_variant	LOW	Y48G1BM.6	WBGene00021671	Y48G1BM.6	c.193+8_193+9insA		22.4
III	10511310	G	GT	splice_region_variant&intron_variant	LOW	F43D9.3	WBGene00009654	F43D9.3a	c.1772+5_1772+6insT		22
III	10511310	G	GT	splice_region_variant&intron_variant	LOW	F43D9.3	WBGene00009654	F43D9.3b	c.1772+5_1772+6insT		22
I	1053922	GA	G	splice_region_variant	LOW	vps-4	WBGene00021334	Y34D9A.10	c.*439delT		21.46
IV	7727258	AGTCG	A	frameshift_variant	HIGH	C50F7.5	WBGene00016845	C50F7.5	c.541_544delGTCG	p.Val181fs	21.32
III	3348173	G	GT	splice_region_variant&intron_variant	LOW	gei-1	WBGene00001559	F45H7.2a	c.1318+5_1318+6insT		20.94
III	3348173	G	GT	splice_region_variant&intron_variant	LOW	gei-1	WBGene00001559	F45H7.2b	c.1318+5_1318+6insT		20.94
III	3348173	G	GT	splice_region_variant&intron_variant	LOW	gei-1	WBGene00001559	F45H7.2d.2	c.811+5_811+6insT		20.94
III	3348173	G	GT	splice_region_variant&intron_variant	LOW	gei-1	WBGene00001559	F45H7.2d.1	c.811+5_811+6insT		20.94
II	3833914	A	ACTTGGG	disruptive_inframe_insertion	MODERATE	oac-4	WBGene00015873	C17A2.5	c.1625_1626insCCCAAG	p.Phe542_Phe543insProSer	20.79
IV	7727263	ATCCATCCGAAGATCCTCAACCTTCTGGATCATCATCTCCAGGACCAG	A	frameshift_variant	HIGH	C50F7.5	WBGene00016845	C50F7.5	c.547_593delCCATCCGAAGATCCTCAACCTTCTGGATCATCATCTCCAGGACCAGT	p.Pro183fs	19.67
II	3833909	G	GC	frameshift_variant	HIGH	oac-4	WBGene00015873	C17A2.5	c.1630_1631insG	p.Ser544fs	19.37
II	3833910	A	ATTTTCGGC	frameshift_variant	HIGH	oac-4	WBGene00015873	C17A2.5	c.1629_1630insGCCGAAAA	p.Ser544fs	19.37
III	2425066	GC	G	frameshift_variant	HIGH	W04B5.2	WBGene00021019	W04B5.2	c.389delC	p.Pro130fs	19.37
II	3834846	TAA	T	frameshift_variant	HIGH	oac-4	WBGene00015873	C17A2.5	c.987_988delTT	p.Tyr330fs	18.12
II	3834850	TGGGCCAATGA	T	frameshift_variant	HIGH	oac-4	WBGene00015873	C17A2.5	c.975_984delTCATTGGCCC	p.His326fs	18.06
I	1382293	CA	C	frameshift_variant	HIGH	Y92H12BL.4	WBGene00022365	Y92H12BL.4	c.383delT	p.Leu128fs	17.58
II	3834843	GC	G	frameshift_variant	HIGH	oac-4	WBGene00015873	C17A2.5	c.991delG	p.Ala331fs	17.58
II	3833732	CGAAAAT	C	conservative_inframe_deletion	MODERATE	oac-4	WBGene00015873	C17A2.5	c.1762_1767delATTTTC	p.Ile588_Phe589del	16.99
II	2903191	CA	C	frameshift_variant	HIGH	Y110A2AM.1	WBGene00022449	Y110A2AM.1	c.810delT	p.Phe270fs	16.11
II	3834811	TGCATAAATGGGCATAAATGGGCCAATGAA	T	frameshift_variant	HIGH	oac-4	WBGene00015873	C17A2.5	c.995_1023delTTCATTGGCCCATTTATGCCCATTTATGC	p.Phe332fs	15.71
I	232098	TG	T	frameshift_variant	HIGH	Y48G1BM.6	WBGene00021671	Y48G1BM.6	c.3373delC	p.Gln1125fs	15.21
V	20825949	GT	G	splice_region_variant&intron_variant	LOW	grl-14	WBGene00001723	T03D8.4a	c.264+6delT		13.98
V	20825949	GT	G	splice_region_variant&intron_variant	LOW	grl-14	WBGene00001723	T03D8.4b	c.264+6delT		13.98
V	20825949	GT	G	splice_region_variant&intron_variant	LOW	grl-14	WBGene00001723	T03D8.4c	c.264+6delT		13.98
II	7123724	TCAACAACAACAACAACAACA	T	frameshift_variant	HIGH	F10E7.2	WBGene00017344	F10E7.2	c.187_206delCAACAACAACAACAACAACA	p.Gln63fs	13.23
II	3833794	G	GAAATGGCTAGTTTAGGGGTGACAGGC	splice_region_variant&intron_variant	LOW	oac-4	WBGene00015873	C17A2.5	c.1710-5_1710-4insGCCTGTCACCCCTAAACTAGCCATTT		12.97
II	7123720	AT	A	frameshift_variant	HIGH	F10E7.2	WBGene00017344	F10E7.2	c.184delT	p.Tyr62fs	12.24
V	17490465	TTTTTCGGACGCGGGTGCGTCCGGTTTTTTTGTTTTTTGTATACATCTCAGTGAGATTGAGTGAGATTGTAAACAAAAAACAAAAAAAAACAAA	T	conservative_inframe_deletion	MODERATE	K03D7.8	WBGene00010535	K03D7.8	c.730_822delTTTGTTTTTTTTTGTTTTTTGTTTACAATCTCACTCAATCTCACTGAGATGTATACAAAAAACAAAAAAACCGGACGCACCCGCGTCCGAAAA	p.Phe244_Lys274del	12.05
X	3812042	CA	C	frameshift_variant	HIGH	F35A5.1	WBGene00018024	F35A5.1	c.4578delA	p.Glu1527fs	11.37
X	3812046	A	AG	frameshift_variant	HIGH	F35A5.1	WBGene00018024	F35A5.1	c.4582dupG	p.Asp1528fs	11.37
III	9101442	G	GAGTC	splice_region_variant&intron_variant	LOW	ZK507.3	WBGene00013979	ZK507.3	c.71+5_71+6insAGTC		10.71
I	237847	G	GCA	frameshift_variant	HIGH	Y48G1BM.6	WBGene00021671	Y48G1BM.6	c.199_200insTG	p.Thr67fs	10.68
I	237841	GAT	G	frameshift_variant	HIGH	Y48G1BM.6	WBGene00021671	Y48G1BM.6	c.204_205delAT	p.Ser69fs	10.43
I	9576737	AC	A	splice_region_variant&intron_variant	LOW	F42H11.1	WBGene00009646	F42H11.1	c.235+6delC		10.31
II	276596	TG	T	splice_region_variant	LOW	B0432.8	WBGene00015189	B0432.8.1	c.*264delC		9.4
II	3269809	C	CA	frameshift_variant	HIGH	F02E11.7	WBGene00195073	F02E11.7a	c.192dupA	p.Leu65fs	9.15
IV	16494486	A	AC	frameshift_variant	HIGH	Y51H4A.2	WBGene00013099	Y51H4A.2	c.24dupG	p.Ser9fs	9.1
III	5985738	AAG	A	frameshift_variant	HIGH	T04C9.3	WBGene00020211	T04C9.3	c.146_147delAG	p.Glu49fs	8.65
V	17116108	TA	T	frameshift_variant	HIGH	ZK218.8	WBGene00013942	ZK218.8	c.84delA	p.Val29fs	8.52
V	17116110	GT	G	frameshift_variant	HIGH	ZK218.8	WBGene00013942	ZK218.8	c.87delT	p.Val30fs	7.94
X	7710413	TC	T	frameshift_variant	HIGH	K09F5.4	WBGene00019583	K09F5.4	c.194delG	p.Gly65fs	7.9
X	13660587	G	GT	splice_region_variant&intron_variant	LOW	C04A11.1	WBGene00007285	C04A11.1	c.36+5_36+6insT		7.84
X	15747864	A	ACCATTCGG	frameshift_variant	HIGH	ZK678.t5	WBGene00014629	ZK678.t5	c.5_6insCCGAATGG	p.Leu3fs	7.8
II	4442633	AT	A	frameshift_variant	HIGH	twk-2	WBGene00006657	T12C9.3	c.4123delA	p.Met1375fs	7.67
III	11164276	G	GGTTCCGGTGAATGGTCGTATTCATAAATCAGTGCTTGATAAACCCGGTTTTGGCGTCGAACTCAATCGTGACTGCAATTTGAAACGCCCCTACAGCCACTAATCACTCCGGGCGTTGC	frameshift_variant&stop_gained	HIGH	cku-70	WBGene00000519	Y47D3A.4	c.1118_1119insGTTCCGGTGAATGGTCGTATTCATAAATCAGTGCTTGATAAACCCGGTTTTGGCGTCGAACTCAATCGTGACTGCAATTTGAAACGCCCCTACAGCCACTAATCACTCCGGGCGTTGC	p.Val374fs	7.46
V	1642950	A	AC	frameshift_variant	HIGH	Y46H3D.1	WBGene00021608	Y46H3D.1	c.110dupC	p.Pro38fs	7.06
V	1642947	G	GCC	frameshift_variant	HIGH	Y46H3D.1	WBGene00021608	Y46H3D.1	c.107_108insCC	p.Thr37fs	6.25
I	11629703	GT	G	splice_region_variant&intron_variant	LOW	W04G5.3	WBGene00012264	W04G5.3	c.58+6delT		6.14
III	10689248	ATTT	A	splice_region_variant&intron_variant	LOW	Y39A1A.17	WBGene00012655	Y39A1A.17	c.599-8_599-6delAAA		5.66
IV	4399441	CGA	C	frameshift_variant	HIGH	Y24D9A.5	WBGene00021283	Y24D9A.5	c.308_309delTC	p.Leu103fs	5.66
X	4620258	AG	A	frameshift_variant	HIGH	pqn-65	WBGene00004148	T13H2.4a	c.165delC	p.Tyr56fs	5.66
X	4620258	AG	A	frameshift_variant	HIGH	pqn-65	WBGene00004148	T13H2.4b	c.165delC	p.Tyr56fs	5.66
I	4565233	CTAA	C	conservative_inframe_deletion	MODERATE	pqn-24	WBGene00004113	D1007.14	c.439_441delAAT	p.Asn147del	5.51
II	13410270	G	GT	frameshift_variant&stop_lost	HIGH	efl-2	WBGene00001162	Y48C3A.17c	c.997dupT	p.Ter333fs	5.44
III	1758625	T	TTGGGGGGGG	splice_region_variant&intron_variant	LOW	Y46E12A.5	WBGene00194738	Y46E12A.5	c.-8+8_-8+9insCCCCCCCCA		5.26
I	10930076	G	GA	splice_region_variant&intron_variant	LOW	F49D11.10	WBGene00045433	F49D11.10.1	c.938-4_938-3insT		5.05
I	10930076	G	GA	splice_region_variant&intron_variant	LOW	F49D11.10	WBGene00045433	F49D11.10.2	c.938-4_938-3insT		5.05
X	8969553	T	TTCGGCCATGTTGAAGCTTTCCTTGTCATATGGTCATGACTGCGCAAATTATCTGTCCTGCATTTGCCCGTAGGCG	stop_gained&conservative_inframe_insertion	HIGH	C48C5.t3	WBGene00022964	C48C5.t3	c.6_7insCGCCTACGGGCAAATGCAGGACAGATAATTTGCGCAGTCATGACCATATGACAAGGAAAGCTTCAACATGGCCGA	p.Arg2_Met3insArgLeuArgAlaAsnAlaGlyGlnIleIleCysAlaValMetThrIleTerGlnGlyLysLeuGlnHisGlyArg	4.91
X	3304508	ATT	A	frameshift_variant	HIGH	F11D5.7	WBGene00043980	F11D5.7	c.79_80delTT	p.Leu27fs	4.85
X	3304513	T	TGC	frameshift_variant	HIGH	F11D5.7	WBGene00043980	F11D5.7	c.83_84insGC	p.Ile28fs	4.85
IV	93835	G	GT	splice_region_variant&intron_variant	LOW	tpa-1	WBGene00006599	B0545.1a	c.279+5_279+6insT		4.56
IV	93835	G	GT	splice_region_variant&intron_variant	LOW	tpa-1	WBGene00006599	B0545.1b.2	c.-133+5_-133+6insT		4.56
II	12606863	TG	T	splice_region_variant&intron_variant	LOW	lips-15	WBGene00012585	Y38E10A.7	c.783+7delG		4.5
I	1953628	C	CA	splice_region_variant&intron_variant	LOW	Y51F10.10	WBGene00021771	Y51F10.10a	c.499-5_499-4insT		4.26
I	1953628	C	CA	splice_region_variant&intron_variant	LOW	Y51F10.10	WBGene00021771	Y51F10.10d	c.454-5_454-4insT		4.26
I	12775739	T	TA	splice_region_variant&intron_variant	LOW	B0019.2	WBGene00007094	B0019.2	c.738-7dupA		4.26
V	1455156	G	GT	splice_region_variant&intron_variant	LOW	chil-14	WBGene00019980	R09B5.12a	c.90+5_90+6insT		4.18
V	1455156	G	GT	splice_region_variant&intron_variant	LOW	chil-14	WBGene00019980	R09B5.12b	c.90+5_90+6insT		4.18
V	20237725	AT	A	frameshift_variant&start_lost	HIGH	sld-5	WBGene00013768	Y113G7B.24a	c.1delA	p.Met1fs	3.62
V	9917601	A	AAAGCTCGGATAGAACAACGCCCGCGCGGAATCCACCTGATCTAATGACGCCTGAACATACCAGCGCATGGCTTGCAGATCCGGGCGTCTGGCGAGCAACTCATAAG	frameshift_variant&stop_gained	HIGH	C50H2.4	WBGene00008240	C50H2.4a	c.479_480insAGCTCGGATAGAACAACGCCCGCGCGGAATCCACCTGATCTAATGACGCCTGAACATACCAGCGCATGGCTTGCAGATCCGGGCGTCTGGCGAGCAACTCATAAGA	p.Ser161fs	3.5
II	3347470	T	TCAACGG	conservative_inframe_insertion	MODERATE	F14D2.14	WBGene00017462	F14D2.14	c.45_46insCCGTTG	p.Glu15_Ile16insProLeu	3.4
II	3335873	C	CATT	conservative_inframe_insertion	MODERATE	F14D2.19	WBGene00206522	F14D2.19	c.826_828dupAAT	p.Asn276dup	3.38
II	13397403	GGT	G	splice_donor_variant&intron_variant	HIGH	Y48C3A.14	WBGene00012995	Y48C3A.14a	c.2046+1_2046+2delGT		3.38
II	13397403	GGT	G	splice_donor_variant&intron_variant	HIGH	Y48C3A.14	WBGene00012995	Y48C3A.14c	c.1638+1_1638+2delGT		3.38
II	13397403	GGT	G	splice_donor_variant&intron_variant	HIGH	Y48C3A.14	WBGene00012995	Y48C3A.14b	c.531+1_531+2delGT		3.38
II	3347472	T	TGATATTCAGCGGCGGTTTTTAGCTCATCATTGGTCTGGATCTGCCAGCGGTGAGTGCCATCTTCCAGCGCGCCCTGCGGTTTACGCACGTTGGCATTGCTGACGG	conservative_inframe_insertion	MODERATE	F14D2.14	WBGene00017462	F14D2.14	c.43_44insCCGTCAGCAATGCCAACGTGCGTAAACCGCAGGGCGCGCTGGAAGATGGCACTCACCGCTGGCAGATCCAGACCAATGATGAGCTAAAAACCGCCGCTGAATATC	p.Glu15delinsAlaValSerAsnAlaAsnValArgLysProGlnGlyAlaLeuGluAspGlyThrHisArgTrpGlnIleGlnThrAsnAspGluLeuLysThrAlaAlaGluTyrGln	3.16
IV	16780615	T	TG	frameshift_variant	HIGH	Y43D4A.5	WBGene00012791	Y43D4A.5a	c.3919dupG	p.Asp1307fs	3.16
IV	16780615	T	TG	frameshift_variant	HIGH	Y43D4A.5	WBGene00012791	Y43D4A.5b	c.1153dupG	p.Asp385fs	3.16
IV	16780615	T	TG	frameshift_variant	HIGH	Y43D4A.5	WBGene00012791	Y43D4A.5c	c.3919dupG	p.Asp1307fs	3.16
IV	16780615	T	TG	frameshift_variant	HIGH	Y43D4A.5	WBGene00012791	Y43D4A.5d	c.1153dupG	p.Asp385fs	3.16
III	2355547	AT	A	splice_region_variant&intron_variant	LOW	gip-1	WBGene00001589	H04J21.3b	c.1253+6delT		3.15
III	2355547	AT	A	splice_region_variant&intron_variant	LOW	gip-1	WBGene00001589	H04J21.3a	c.1253+6delT		3.15
IV	1577481	G	GT	splice_region_variant&intron_variant	LOW	Y41D4B.14	WBGene00021516	Y41D4B.14	c.277+5_277+6insT		3.1
X	1584965	G	GT	splice_region_variant&intron_variant	LOW	wrt-9	WBGene00006955	B0344.2	c.371+5_371+6insT		3.03
IV	16780618	T	TG	frameshift_variant	HIGH	Y43D4A.5	WBGene00012791	Y43D4A.5a	c.3921_3922insG	p.Met1308fs	2.95
IV	16780618	T	TG	frameshift_variant	HIGH	Y43D4A.5	WBGene00012791	Y43D4A.5b	c.1155_1156insG	p.Met386fs	2.95
IV	16780618	T	TG	frameshift_variant	HIGH	Y43D4A.5	WBGene00012791	Y43D4A.5c	c.3921_3922insG	p.Met1308fs	2.95
IV	16780618	T	TG	frameshift_variant	HIGH	Y43D4A.5	WBGene00012791	Y43D4A.5d	c.1155_1156insG	p.Met386fs	2.95
X	3178099	G	GA	splice_region_variant&intron_variant	LOW	klp-4	WBGene00002217	F56E3.3b	c.376-4_376-3insT		2.9
X	3178099	G	GA	splice_region_variant&intron_variant	LOW	klp-4	WBGene00002217	F56E3.3a	c.376-4_376-3insT		2.9
X	3178099	G	GA	splice_region_variant&intron_variant	LOW	klp-4	WBGene00002217	F56E3.3c	c.376-4_376-3insT		2.9
III	10907892	GACGGAA	G	conservative_inframe_deletion	MODERATE	unc-119	WBGene00006843	M142.1c	c.361_366delACGGAA	p.Thr121_Glu122del	2.88
III	10907892	GACGGAA	G	conservative_inframe_deletion	MODERATE	unc-119	WBGene00006843	M142.1a	c.286_291delACGGAA	p.Thr96_Glu97del	2.88
III	10907892	GACGGAA	G	conservative_inframe_deletion	MODERATE	unc-119	WBGene00006843	M142.1b	c.226_231delACGGAA	p.Thr76_Glu77del	2.88
II	228058	C	CA	splice_region_variant&intron_variant	LOW	Y43H11AL.1	WBGene00021545	Y43H11AL.1b.1	c.965-5_965-4insT		2.73
II	228058	C	CA	splice_region_variant&intron_variant	LOW	Y43H11AL.1	WBGene00021545	Y43H11AL.1d	c.-11-5_-11-4insT		2.73
II	228058	C	CA	splice_region_variant&intron_variant	LOW	Y43H11AL.1	WBGene00021545	Y43H11AL.1c	c.923-5_923-4insT		2.73
II	228058	C	CA	splice_region_variant&intron_variant	LOW	Y43H11AL.1	WBGene00021545	Y43H11AL.1b.2	c.965-5_965-4insT		2.73
II	228058	C	CA	splice_region_variant&intron_variant	LOW	Y43H11AL.1	WBGene00021545	Y43H11AL.1a.1	c.965-5_965-4insT		2.73
II	228058	C	CA	splice_region_variant&intron_variant	LOW	Y43H11AL.1	WBGene00021545	Y43H11AL.1a.2	c.965-5_965-4insT		2.73
I	4591377	G	GA	frameshift_variant	HIGH	D1007.9	WBGene00017006	D1007.9	c.284dupA	p.Asn95fs	2.69
III	10907887	A	ACG	frameshift_variant	HIGH	unc-119	WBGene00006843	M142.1c	c.355_356insCG	p.Asn119fs	2.58
III	10907887	A	ACG	frameshift_variant	HIGH	unc-119	WBGene00006843	M142.1a	c.280_281insCG	p.Asn94fs	2.58
III	10907887	A	ACG	frameshift_variant	HIGH	unc-119	WBGene00006843	M142.1b	c.220_221insCG	p.Asn74fs	2.58
II	10984126	G	GT	splice_region_variant&intron_variant	LOW	ptp-3	WBGene00004215	C09D8.1j	c.1265+5_1265+6insT		2.5
II	10984126	G	GT	splice_region_variant&intron_variant	LOW	ptp-3	WBGene00004215	C09D8.1d	c.1274+5_1274+6insT		2.5
II	10984126	G	GT	splice_region_variant&intron_variant	LOW	ptp-3	WBGene00004215	C09D8.1a	c.1133+5_1133+6insT		2.5
II	10984126	G	GT	splice_region_variant&intron_variant	LOW	ptp-3	WBGene00004215	C09D8.1f	c.1133+5_1133+6insT		2.5
II	10984126	G	GT	splice_region_variant&intron_variant	LOW	ptp-3	WBGene00004215	C09D8.1l	c.1133+5_1133+6insT		2.5
II	10984126	G	GT	splice_region_variant&intron_variant	LOW	ptp-3	WBGene00004215	C09D8.1i	c.1265+5_1265+6insT		2.5
II	10984126	G	GT	splice_region_variant&intron_variant	LOW	ptp-3	WBGene00004215	C09D8.1e	c.548+5_548+6insT		2.5
IV	15721060	G	GT	splice_region_variant&intron_variant	LOW	Y105C5A.15	WBGene00013639	Y105C5A.15c	c.2375+5_2375+6insT		2.49
IV	15721060	G	GT	splice_region_variant&intron_variant	LOW	Y105C5A.15	WBGene00013639	Y105C5A.15e	c.2366+5_2366+6insT		2.49
IV	15721060	G	GT	splice_region_variant&intron_variant	LOW	Y105C5A.15	WBGene00013639	Y105C5A.15a	c.2084+5_2084+6insT		2.49
IV	15721060	G	GT	splice_region_variant&intron_variant	LOW	Y105C5A.15	WBGene00013639	Y105C5A.15b	c.2093+5_2093+6insT		2.49
III	10907885	A	AG	frameshift_variant	HIGH	unc-119	WBGene00006843	M142.1c	c.353_354insG	p.Asn119fs	2.44
III	10907885	A	AG	frameshift_variant	HIGH	unc-119	WBGene00006843	M142.1a	c.278_279insG	p.Asn94fs	2.44
III	10907885	A	AG	frameshift_variant	HIGH	unc-119	WBGene00006843	M142.1b	c.218_219insG	p.Asn74fs	2.44
I	4441768	A	AT	splice_region_variant&intron_variant	LOW	C41D11.3	WBGene00016562	C41D11.3c.1	c.985-7_985-6insA		2.26
I	4441768	A	AT	splice_region_variant&intron_variant	LOW	C41D11.3	WBGene00016562	C41D11.3d.1	c.979-7_979-6insA		2.26
I	4441768	A	AT	splice_region_variant&intron_variant	LOW	C41D11.3	WBGene00016562	C41D11.3c.2	c.985-7_985-6insA		2.26
I	4441768	A	AT	splice_region_variant&intron_variant	LOW	C41D11.3	WBGene00016562	C41D11.3d.2	c.979-7_979-6insA		2.26
V	6181538	GTGC	G	conservative_inframe_deletion	MODERATE	ttn-1	WBGene00006436	W06H8.8g	c.15595_15597delGCA	p.Ala5199del	2.26
V	6181538	GTGC	G	conservative_inframe_deletion	MODERATE	ttn-1	WBGene00006436	W06H8.8e.2	c.15595_15597delGCA	p.Ala5199del	2.26
V	6181538	GTGC	G	conservative_inframe_deletion	MODERATE	ttn-1	WBGene00006436	W06H8.8f.2	c.15595_15597delGCA	p.Ala5199del	2.26
V	6181538	GTGC	G	conservative_inframe_deletion	MODERATE	ttn-1	WBGene00006436	W06H8.8e.1	c.15595_15597delGCA	p.Ala5199del	2.26
V	6181538	GTGC	G	conservative_inframe_deletion	MODERATE	ttn-1	WBGene00006436	W06H8.8f.1	c.15595_15597delGCA	p.Ala5199del	2.26
V	6181538	GTGC	G	conservative_inframe_deletion	MODERATE	ttn-1	WBGene00006436	W06H8.8d	c.15595_15597delGCA	p.Ala5199del	2.26
V	6181542	AAGTTTC	A	disruptive_inframe_deletion	MODERATE	ttn-1	WBGene00006436	W06H8.8g	c.15588_15593delGAAACT	p.Glu5196_Leu5198delinsAsp	2.26
V	6181542	AAGTTTC	A	disruptive_inframe_deletion	MODERATE	ttn-1	WBGene00006436	W06H8.8e.2	c.15588_15593delGAAACT	p.Glu5196_Leu5198delinsAsp	2.26
V	6181542	AAGTTTC	A	disruptive_inframe_deletion	MODERATE	ttn-1	WBGene00006436	W06H8.8f.2	c.15588_15593delGAAACT	p.Glu5196_Leu5198delinsAsp	2.26
V	6181542	AAGTTTC	A	disruptive_inframe_deletion	MODERATE	ttn-1	WBGene00006436	W06H8.8e.1	c.15588_15593delGAAACT	p.Glu5196_Leu5198delinsAsp	2.26
V	6181542	AAGTTTC	A	disruptive_inframe_deletion	MODERATE	ttn-1	WBGene00006436	W06H8.8f.1	c.15588_15593delGAAACT	p.Glu5196_Leu5198delinsAsp	2.26
V	6181542	AAGTTTC	A	disruptive_inframe_deletion	MODERATE	ttn-1	WBGene00006436	W06H8.8d	c.15588_15593delGAAACT	p.Glu5196_Leu5198delinsAsp	2.26
X	3173133	G	GA	splice_region_variant&intron_variant	LOW	klp-4	WBGene00002217	F56E3.3b	c.4423-4_4423-3insT		2.23
X	3173133	G	GA	splice_region_variant&intron_variant	LOW	klp-4	WBGene00002217	F56E3.3a	c.4423-4_4423-3insT		2.23
IV	7578783	GCTT	G	disruptive_inframe_deletion	MODERATE	cec-5	WBGene00017993	F32E10.6.1	c.1088_1090delAAG	p.Glu363del	2.1
IV	7578783	GCTT	G	disruptive_inframe_deletion	MODERATE	cec-5	WBGene00017993	F32E10.6.2	c.1088_1090delAAG	p.Glu363del	2.1
IV	7578783	GCTT	G	disruptive_inframe_deletion	MODERATE	cec-5	WBGene00017993	F32E10.6.3	c.1088_1090delAAG	p.Glu363del	2.1
III	10907907	GC	G	frameshift_variant	HIGH	unc-119	WBGene00006843	M142.1c	c.376delC	p.Gln126fs	2.08
III	10907907	GC	G	frameshift_variant	HIGH	unc-119	WBGene00006843	M142.1a	c.301delC	p.Gln101fs	2.08
III	10907907	GC	G	frameshift_variant	HIGH	unc-119	WBGene00006843	M142.1b	c.241delC	p.Gln81fs	2.08
IV	6922145	GCCACCGAAGGAACTGGAACCCCACCACCACCACCAACTGGAGAACCACAGGATCTTTCTACAGAAGGTAATGCTTCTCGTCGTCCACCACCA	G	frameshift_variant&splice_acceptor_variant&splice_region_variant&intron_variant	HIGH	T22D1.2	WBGene00020681	T22D1.2	c.265+27_294delCCACCGAAGGAACTGGAACCCCACCACCACCACCAACTGGAGAACCACAGGATCTTTCTACAGAAGGTAATGCTTCTCGTCGTCCACCACCA	p.Glu89fs	2.03
V	14319622	TCTC	T	disruptive_inframe_deletion	MODERATE	F47B8.13	WBGene00044193	F47B8.13	c.107_109delGAG	p.Gly36del	2.03
II	972930	G	GA	frameshift_variant	HIGH	C32B5.15	WBGene00016308	C32B5.15	c.20dupT	p.Arg8fs	1.93
III	11370967	TA	T	splice_region_variant&intron_variant	LOW	tba-7	WBGene00006533	T28D6.2	c.520-3delT		1.81
III	11245380	G	GT	splice_region_variant&intron_variant	LOW	rsks-1	WBGene00012929	Y47D3A.16	c.65+5_65+6insT		1.73
I	237820	TGA	T	frameshift_variant	HIGH	Y48G1BM.6	WBGene00021671	Y48G1BM.6	c.225_226delTC	p.Thr77fs	1.66
V	4961405	AT	A	splice_region_variant&intron_variant	LOW	tam-1	WBGene00006523	F26G5.9	c.775-7delA		1.66
V	15952447	AAT	A	frameshift_variant	HIGH	srw-56	WBGene00005803	F36G9.16	c.368_369delAT	p.Tyr123fs	1.59
IV	9127755	G	GT	splice_region_variant&intron_variant	LOW	nrfl-1	WBGene00006438	C01F6.6b	c.1257+5_1257+6insT		1.57
IV	9127755	G	GT	splice_region_variant&intron_variant	LOW	nrfl-1	WBGene00006438	C01F6.6c	c.906+5_906+6insT		1.57
IV	9127755	G	GT	splice_region_variant&intron_variant	LOW	nrfl-1	WBGene00006438	C01F6.6d	c.906+5_906+6insT		1.57
IV	9127755	G	GT	splice_region_variant&intron_variant	LOW	nrfl-1	WBGene00006438	C01F6.6i	c.834+5_834+6insT		1.57
IV	9127755	G	GT	splice_region_variant&intron_variant	LOW	nrfl-1	WBGene00006438	C01F6.6j.2	c.426+5_426+6insT		1.57
IV	9127755	G	GT	splice_region_variant&intron_variant	LOW	nrfl-1	WBGene00006438	C01F6.6a	c.834+5_834+6insT		1.57
IV	9127755	G	GT	splice_region_variant&intron_variant	LOW	nrfl-1	WBGene00006438	C01F6.6e.2	c.426+5_426+6insT		1.57
IV	9127755	G	GT	splice_region_variant&intron_variant	LOW	nrfl-1	WBGene00006438	C01F6.6h	c.906+5_906+6insT		1.57
IV	9127755	G	GT	splice_region_variant&intron_variant	LOW	nrfl-1	WBGene00006438	C01F6.6j.3	c.426+5_426+6insT		1.57
IV	9127755	G	GT	splice_region_variant&intron_variant	LOW	nrfl-1	WBGene00006438	C01F6.6e.3	c.426+5_426+6insT		1.57
IV	9127755	G	GT	splice_region_variant&intron_variant	LOW	nrfl-1	WBGene00006438	C01F6.6f	c.495+5_495+6insT		1.57
IV	9127755	G	GT	splice_region_variant&intron_variant	LOW	nrfl-1	WBGene00006438	C01F6.6g	c.531+5_531+6insT		1.57
IV	9127755	G	GT	splice_region_variant&intron_variant	LOW	nrfl-1	WBGene00006438	C01F6.6j.1	c.426+5_426+6insT		1.57
IV	9127755	G	GT	splice_region_variant&intron_variant	LOW	nrfl-1	WBGene00006438	C01F6.6e.1	c.426+5_426+6insT		1.57
II	12606904	GAT	G	splice_region_variant&intron_variant	LOW	lips-15	WBGene00012585	Y38E10A.7	c.784-9_784-8delAT		1.54
III	3637685	TAG	T	splice_region_variant&intron_variant	LOW	rilp-1	WBGene00007860	C32A3.3b	c.21+4_21+5delAG		1.54
V	19469359	G	GA	frameshift_variant	HIGH	Y43F8B.12	WBGene00012822	Y43F8B.12	c.318dupA	p.Leu107fs	1.49
II	7006461	A	ATGTTGCCGGATCTGGTCTGAACGCCATCTCCGGCTAACAAAATAATGTCGCTAAAAC	splice_region_variant&intron_variant	LOW	unc-104	WBGene00006831	C52E12.2b	c.2487-9_2487-8insTGTTGCCGGATCTGGTCTGAACGCCATCTCCGGCTAACAAAATAATGTCGCTAAAAC		1.43
II	7006461	A	ATGTTGCCGGATCTGGTCTGAACGCCATCTCCGGCTAACAAAATAATGTCGCTAAAAC	splice_region_variant&intron_variant	LOW	unc-104	WBGene00006831	C52E12.2a	c.2346-9_2346-8insTGTTGCCGGATCTGGTCTGAACGCCATCTCCGGCTAACAAAATAATGTCGCTAAAAC		1.43
III	2967655	G	GA	splice_region_variant&intron_variant	LOW	H05C05.3	WBGene00019159	H05C05.3	c.714-4_714-3insT		1.37
V	5585845	G	GT	splice_donor_variant&intron_variant	HIGH	CD4.11	WBGene00044542	CD4.11	c.338+1_338+2insT		1.36
V	18550341	AT	A	splice_region_variant&intron_variant	LOW	Y51A2D.8	WBGene00013076	Y51A2D.8	c.878-7delA		1.22
V	15417294	C	CA	splice_region_variant&intron_variant	LOW	srh-265	WBGene00005471	T06E6.9	c.723+7_723+8insA		0.93
